# Supplementary material for: A spatial analysis of parliamentary elections in Sweden 1985–2018
Source: Springer Nature journal article supplement (doi:10.1007/s41109-021-00409-z), 2021-09-03
Supplement: MOESM1 [file 19632432]

## Sheet: 1985
	M	C	FP	KD	S	V	MP	SD	Other	Invalid	Nonvoters
Ale	2309	2028	2267	0	6947	775	185	0	21	135	1299
Alingsås	4063	3033	4428	0	8159	1050	313	0	32	167	1887
Alvesta	2541	3208	1293	0	5207	461	141	0	20	109	1454
Aneby	859	1622	648	0	1360	78	63	0	8	16	413
Arboga	1595	1199	1206	0	5241	431	172	0	15	78	1092
Arjeplog	245	373	236	0	1310	421	22	0	6	17	503
Arvidsjaur	467	693	489	0	3508	633	27	0	19	44	644
Arvika	3160	2664	2617	0	8308	988	329	0	28	154	2506
Askersund	1160	1577	861	0	4012	241	75	0	10	48	922
Avesta	1947	2468	1515	0	10023	1026	282	0	23	148	1907
Bengtsfors	1190	1933	1004	0	3685	227	114	0	14	59	958
Berg	766	1909	389	0	2580	200	51	0	4	28	957
Bjurholm	324	575	448	0	803	29	21	0	7	6	287
Bjuv	1570	819	972	0	4934	227	64	0	7	86	945
Boden	2654	1961	1867	0	11829	1502	121	0	40	79	2150
Bollnäs	2346	3331	2234	0	9464	1273	326	0	16	163	2654
Borgholm	1707	2746	763	0	2182	164	135	0	17	38	958
Borlänge	4462	3412	3362	0	16669	1811	728	0	325	328	3710
Borås	15477	8015	10383	0	30052	3031	694	0	247	473	6667
Botkyrka	8155	1548	4965	0	15037	2306	553	0	147	362	4434
Boxholm	410	792	313	0	2215	214	24	0	8	34	352
Bromölla	959	579	790	0	5013	392	64	0	10	63	857
Bräcke	648	1174	343	0	3608	318	51	0	4	31	739
Burlöv	2194	417	1315	0	4946	308	126	0	19	89	876
Båstad	3117	2091	1424	0	1660	96	157	0	34	61	954
Dals-Ed	586	1234	479	0	970	72	64	0	8	19	530
Danderyd	10965	688	4024	0	3266	492	307	0	47	127	1156
Degerfors	740	831	656	0	5280	611	96	0	11	56	589
Dorotea	163	469	302	0	1496	190	26	0	3	11	379
Eda	812	1152	602	0	3153	215	47	0	13	29	782
Ekerö	3796	881	2006	0	3021	433	198	0	32	73	765
Eksjö	2538	3229	1841	0	4195	283	181	0	10	80	1361
Emmaboda	1085	1810	588	0	3549	235	121	0	10	75	824
Enköping	4419	3990	2746	0	9213	624	293	0	60	236	2621
Eskilstuna	9678	4658	8106	0	31485	2526	727	0	125	479	6491
Eslöv	3936	3167	1829	0	8110	404	232	0	23	126	2190
Essunga	1079	1251	521	0	986	68	26	0	3	25	417
Fagersta	1242	620	916	0	6032	574	90	0	19	90	1004
Falkenberg	4664	6199	3081	0	9008	581	384	0	34	249	2415
Falköping	4607	5598	2886	0	7907	679	273	0	25	146	2337
Falun	7618	5122	5463	0	14068	1510	598	0	65	373	4548
Filipstad	1333	703	896	0	5979	565	144	0	11	74	1182
Finspång	2173	2006	1540	0	9307	735	222	0	18	127	1364
Flen	1824	1755	1221	0	5970	483	208	0	38	106	1123
Forshaga	1196	923	793	0	4375	310	79	0	6	58	677
Färgelanda	792	1526	549	0	1835	88	68	0	7	38	562
Gagnef	902	1557	736	0	2911	212	138	0	8	71	681
Gislaved	3570	4107	2497	0	7133	432	221	0	33	167	1791
Gnosjö	1209	1467	911	0	1923	155	38	0	11	34	495
Gotland	6437	9204	3928	0	15791	1402	938	0	66	442	4774
Grums	855	899	605	0	4125	348	60	0	7	45	804
Grästorp	924	1167	630	0	1088	76	47	0	4	32	453
Gullspång	811	948	464	0	1947	163	56	0	9	35	470
Gällivare	1831	876	925	0	8746	2790	94	0	181	97	2649
Gävle	9544	4552	8387	0	32898	3795	1028	0	175	448	7401
Göteborg	62325	14242	57730	0	113270	26013	5216	0	3773	2654	36759
Götene	1569	1761	1387	0	3492	249	103	0	16	62	849
Habo	1227	1252	874	0	1849	102	60	0	18	46	451
Hagfors	1218	1420	686	0	7695	920	149	0	7	79	1056
Hallsberg	1382	1817	1249	0	6167	525	147	0	21	94	1115
Hallstahammar	1430	793	1092	0	6539	793	100	0	17	68	1206
Halmstad	11679	5769	8035	0	23420	1939	1022	0	84	464	5400
Hammarö	1623	417	1128	0	4782	481	140	0	8	53	631
Haninge	8225	1852	5568	0	15516	2647	482	0	282	415	4307
Haparanda	848	911	232	0	2796	305	56	0	15	19	903
Heby	1075	2449	880	0	3823	396	88	0	15	107	1023
Hedemora	1640	1929	1220	0	5617	642	275	0	14	123	1345
Helsingborg	19811	4260	11321	0	30851	2606	1166	0	317	749	8915
Herrljunga	1307	1918	1015	0	1900	176	76	0	13	58	530
Hjo	1416	1130	824	0	2382	163	72	0	7	42	607
Hofors	731	642	637	0	5622	829	61	0	10	60	914
Huddinge	11691	1867	6973	0	16579	2934	652	0	416	465	4686
Hudiksvall	3037	5201	2569	0	11809	1842	525	0	33	215	3762
Hultsfred	1917	2945	947	0	5476	448	79	0	13	93	1286
Hylte	1059	2172	828	0	2958	104	116	0	8	64	797
Håbo	2449	627	1136	0	3242	314	82	0	19	66	769
Hällefors	644	486	526	0	4458	497	91	0	10	37	844
Härjedalen	1063	1347	630	0	5107	398	118	0	8	63	1461
Härnösand	3381	3925	2111	0	8389	966	354	0	42	131	2051
Härryda	3536	1520	3558	0	5726	793	259	0	22	108	1503
Hässleholm	7498	6579	4373	0	12759	829	392	0	66	260	3965
Höganäs	4998	1410	2369	0	5595	299	264	0	31	131	1360
Högsby	831	1316	383	0	2469	231	52	0	5	20	546
Hörby	1958	2658	1294	0	2442	81	170	0	21	75	1145
Höör	2145	1511	1082	0	2422	101	175	0	12	55	947
Jokkmokk	483	287	401	0	2755	426	101	0	7	28	944
Järfälla	9906	1461	6504	0	14262	1976	488	0	101	378	3108
Jönköping	14778	11892	11038	0	31949	2784	686	0	294	508	7196
Kalix	1185	1461	865	0	8598	750	102	0	21	60	1385
Kalmar	9127	4332	4365	0	17372	1451	626	0	71	342	4314
Karlsborg	1002	932	851	0	2652	135	72	0	2	59	489
Karlshamn	3401	2359	2503	0	11704	1259	286	0	31	185	2608
Karlskoga	4106	1691	3060	0	13873	1484	238	0	35	203	2407
Karlskrona	7844	5077	5708	0	20193	1721	515	0	77	336	4506
Karlstad	12752	4811	7672	0	23743	2500	981	0	79	409	5589
Katrineholm	3355	2803	2645	0	11631	812	282	0	293	208	2121
Kil	1677	1116	1055	0	3238	286	117	0	8	67	681
Kinda	1299	2149	727	0	2521	153	80	0	10	69	738
Kiruna	1493	799	1146	0	10105	2696	121	0	237	72	2971
Klippan	2677	1757	1226	0	4493	183	135	0	17	118	1497
Kramfors	1828	3817	1036	0	10264	1310	236	0	20	117	1583
Kristianstad	11218	5557	7036	0	21684	1270	624	0	80	443	5560
Kristinehamn	3137	1967	2444	0	9395	963	193	0	26	131	2108
Krokom	1173	2474	726	0	4275	379	149	0	11	59	1159
Kumla	1557	1943	1530	0	6237	583	139	0	41	112	1204
Kungsbacka	9874	4318	6975	0	8976	787	505	0	54	209	2733
Kungsör	899	730	722	0	2712	273	121	0	17	41	548
Kungälv	4577	2834	4035	0	8313	883	435	0	23	141	1822
Kävlinge	3410	1416	1749	0	6474	265	162	0	21	122	1062
Köping	2202	2088	1785	0	9359	1021	201	0	330	148	2179
Laholm	3222	4376	1605	0	4386	270	238	0	11	139	1646
Landskrona	5798	1258	2502	0	13052	796	293	0	59	190	2656
Laxå	575	853	584	0	2985	280	71	0	10	50	603
Leksand	1906	2422	1262	0	3520	282	158	0	11	103	1219
Lerum	4919	1846	4890	0	6590	895	421	0	54	177	1508
Lessebo	892	748	464	0	3342	463	80	0	8	37	487
Lidingö	12316	879	5528	0	5739	973	447	0	51	214	2060
Lidköping	4405	3972	3615	0	10437	1136	301	0	43	185	2829
Lilla Edet	1030	1210	902	0	3781	368	130	0	15	49	868
Lindesberg	2484	3025	1711	0	8116	751	420	0	52	143	1917
Linköping	18918	8945	12374	0	34450	3998	1190	0	626	775	7748
Ljungby	3508	4652	2126	0	6766	587	209	0	19	162	2187
Ljusdal	1628	2781	1589	0	6755	1209	260	0	22	99	2554
Ljusnarsberg	500	561	391	0	2606	393	63	0	6	34	653
Lomma	4236	702	2118	0	3828	172	169	0	14	96	668
Ludvika	2486	1761	1927	0	12328	1837	346	0	33	214	2502
Luleå	5962	4061	4855	0	24887	4194	487	0	387	255	4750
Lund	14872	4141	9210	0	19971	3917	1652	0	202	635	4822
Lycksele	902	1633	1486	0	5035	484	75	0	18	42	1192
Lysekil	1658	894	1589	0	5437	422	124	0	22	85	1073
Malmö	46268	5515	22279	0	73048	6271	2146	0	1817	1542	19527
Malung	1383	1520	971	0	3962	296	133	0	7	67	872
Malå	222	392	412	0	1597	158	33	0	2	10	386
Mariestad	3337	2426	2188	0	7269	618	352	0	32	132	1930
Mark	3941	4286	2256	0	9898	813	235	0	29	156	1835
Markaryd	1309	1614	748	0	3236	238	125	0	10	59	960
Mellerud	1454	2198	804	0	2431	164	118	0	6	50	877
Mjölby	3060	2933	1953	0	8463	616	164	0	38	202	1909
Mora	2324	2862	1670	0	5337	467	222	0	23	117	2081
Motala	4352	3110	3684	0	14941	1268	304	0	37	217	2939
Mullsjö	865	1065	671	0	1492	95	76	0	8	41	336
Munkedal	1202	1769	903	0	2817	197	157	0	12	49	922
Munkfors	293	340	279	0	2473	178	32	0	4	24	377
Mölndal	6673	2682	7147	0	13634	2069	517	0	162	286	3282
Mönsterås	1562	1578	717	0	4565	415	128	0	18	73	958
Mörbylånga	2048	2054	966	0	3093	184	107	0	11	59	874
Nacka	13048	1346	6457	0	11957	2432	572	0	543	338	3547
Nora	1042	812	897	0	3407	292	138	0	6	62	800
Norberg	512	416	344	0	2626	430	47	0	7	49	459
Nordanstig	711	2225	683	0	3502	467	200	0	7	56	1131
Nordmaling	693	1424	566	0	2526	156	37	0	11	18	529
Norrköping	18114	6917	9898	0	39309	3739	1001	0	103	625	9647
Norrtälje	5996	4765	3711	0	11911	1223	319	0	57	238	3495
Norsjö	310	673	594	0	1851	204	28	0	5	13	562
Nybro	2455	3115	1243	0	6871	551	114	0	21	149	1534
Nyköping	9093	5661	5713	0	20912	1611	791	0	84	381	4279
Nynäshamn	2639	1112	1696	0	7245	925	328	0	34	106	1292
Nässjö	3643	4489	2826	0	9852	701	222	0	39	138	1903
Ockelbo	460	981	350	0	2370	253	54	0	9	22	657
Olofström	1249	1273	1071	0	5301	474	115	0	13	76	1159
Orsa	814	935	610	0	2047	273	145	0	2	39	839
Orust	1729	1659	1600	0	2965	286	152	0	12	66	1113
Osby	1579	1749	1144	0	4306	270	93	0	15	60	1155
Oskarshamn	3527	2547	2087	0	9453	817	202	0	40	153	2090
Ovanåker	1028	2542	1133	0	4201	259	222	0	27	74	983
Oxelösund	1186	418	901	0	5285	674	105	0	41	66	796
Pajala	600	670	286	0	3067	1136	22	0	10	35	840
Partille	4619	1261	4541	0	7107	1192	293	0	149	133	1817
Perstorp	1056	685	549	0	2164	123	34	0	15	45	550
Piteå	2201	3627	1938	0	16806	1707	201	0	82	159	2142
Ragunda	446	1082	309	0	3025	234	82	0	7	43	602
Robertsfors	541	1850	738	0	1890	150	41	0	8	29	557
Ronneby	3296	2821	2240	0	10462	769	304	0	31	140	2177
Rättvik	1415	1673	1145	0	2690	260	130	0	5	57	1401
Sala	2479	3031	2021	0	5860	546	286	0	15	187	1621
Salem	2207	423	1320	0	2627	378	110	0	24	69	664
Sandviken	3580	2918	2741	0	16838	1823	293	0	312	165	2775
Sigtuna	4815	1462	2677	0	7163	842	182	0	41	172	2143
Simrishamn	3484	2259	1865	0	5413	240	213	0	78	115	2202
Sjöbo	2314	2766	1065	0	3553	122	163	0	12	93	1419
Skara	2563	2104	1856	0	4944	397	226	0	113	111	1314
Skellefteå	4833	8749	6909	0	26751	2473	416	0	223	332	5764
Skinnskatteberg	360	410	264	0	2103	225	36	0	8	20	356
Skurup	1917	1901	991	0	3222	113	136	0	37	95	983
Skövde	6155	4546	4782	0	13049	1248	416	0	36	260	3511
Smedjebacken	923	1034	724	0	5452	574	121	0	14	95	871
Sollefteå	1890	3011	1039	0	10938	1019	283	0	24	114	1858
Sollentuna	10145	1690	5903	0	10309	1612	552	0	81	266	2558
Solna	11714	1399	5846	0	13455	2668	562	0	292	351	4743
Sorsele	241	630	357	0	1080	103	33	0	4	13	493
Sotenäs	1230	760	1181	0	2921	211	84	0	6	52	766
Staffanstorp	3608	1077	1765	0	4294	171	175	0	15	126	717
Stenungsund	2399	1441	2010	0	4166	412	166	0	14	91	1324
Stockholm	136899	16745	71639	0	172352	43384	7870	0	4228	4724	57860
Storfors	494	436	346	0	2144	177	28	0	3	17	328
Storuman	774	984	850	0	2405	220	102	0	9	36	978
Strängnäs	3868	1702	2949	0	7107	608	269	0	25	123	1615
Strömstad	1084	1126	1045	0	2694	152	149	0	9	28	1047
Strömsund	1113	2308	630	0	6904	529	117	0	15	57	1527
Sundbyberg	4124	647	2842	0	9206	1663	286	0	164	216	2349
Sundsvall	9112	8701	8101	0	33133	3733	842	0	340	480	7466
Sunne	1905	2779	1059	0	3261	184	94	0	4	31	1167
Surahammar	692	455	676	0	4507	474	71	0	9	66	640
Svalöv	1768	1762	779	0	3631	115	93	0	83	75	881
Svedala	2702	1121	1512	0	4879	155	91	0	49	99	807
Svenljunga	1729	1946	958	0	2426	146	113	0	11	75	717
Säffle	2433	2875	1378	0	5431	373	87	0	14	72	1565
Säter	1185	1693	837	0	3167	330	121	0	11	105	888
Sävsjö	1712	2617	1068	0	2223	115	52	0	21	39	858
Söderhamn	2188	2323	1819	0	12954	1622	245	0	29	140	2471
Söderköping	1872	1888	943	0	2905	198	170	0	2	67	859
Södertälje	9719	3270	7196	0	21769	2909	880	0	487	471	6234
Sölvesborg	2277	1261	1256	0	5366	327	145	0	22	90	1177
Tanum	1627	2075	1438	0	2112	144	193	0	7	73	1135
Tibro	1201	1313	1303	0	3189	221	74	0	6	53	822
Tidaholm	1439	1706	1046	0	4426	310	102	0	10	75	853
Tierp	1386	2703	1443	0	7747	387	118	0	47	126	1442
Timrå	1015	1831	1012	0	7554	869	100	0	27	68	1241
Tingsryd	2129	2847	801	0	3454	338	120	0	13	79	1230
Tjörn	2178	1280	2131	0	2173	186	145	0	13	52	981
Tomelilla	2005	2113	916	0	2961	120	83	0	14	83	1309
Torsby	1743	1857	823	0	5245	733	134	0	10	66	1443
Torsås	1064	1778	463	0	1929	88	39	0	11	33	616
Tranemo	1547	2100	992	0	3279	157	75	0	11	83	659
Tranås	2469	2154	1912	0	5648	353	121	0	27	68	1305
Trelleborg	5020	2342	2399	0	12394	400	277	0	38	214	2552
Trollhättan	5081	3096	4581	0	17373	1595	550	0	47	223	3776
Tyresö	5608	832	3381	0	7453	1356	383	0	109	193	1736
Täby	14413	1542	7272	0	8887	1204	576	0	98	258	2577
Töreboda	1314	1839	727	0	2607	191	93	0	7	75	938
Uddevalla	5515	3964	4789	0	14975	1440	570	0	130	281	3833
Ulricehamn	3446	4127	2249	0	4803	328	249	0	27	131	1355
Umeå	7691	7996	8948	0	25211	4359	1015	0	710	458	6073
Upplands-Väsby	4978	964	3206	0	8182	1136	287	0	57	200	2214
Upplands-Bro	2765	698	1695	0	5164	670	218	0	27	102	1131
Uppsala	22494	10292	17802	0	39244	6947	2079	0	1125	956	10845
Uppvidinge	1096	1841	580	0	3303	406	73	0	9	53	835
Vadstena	1069	846	676	0	2394	147	69	0	17	62	463
Vaggeryd	1384	2109	1027	0	3245	306	64	0	5	41	681
Valdemarsvik	1068	1280	526	0	2903	207	52	0	11	39	550
Vallentuna	4081	1219	1920	0	3788	552	215	0	23	140	1065
Vansbro	801	1414	543	0	2644	238	93	0	9	64	687
Vara	3133	3337	1497	0	3199	168	95	0	12	87	1369
Varberg	5775	6676	4353	0	12543	918	440	0	48	348	3098
Vaxholm	1416	192	806	0	1458	214	89	0	6	57	419
Vellinge	7904	1172	2645	0	4477	122	204	0	20	119	1011
Vetlanda	3416	5645	2506	0	6711	520	199	0	27	118	2031
Vilhelmina	482	1117	633	0	3178	309	80	0	8	14	895
Vimmerby	2084	3247	942	0	4159	324	105	0	19	124	1199
Vindeln	646	1235	825	0	1755	110	55	0	10	15	552
Vingåker	901	1134	780	0	3291	228	185	0	15	61	612
Vårgårda	1248	1856	1176	0	1729	141	116	0	7	51	548
Vänersborg	4631	3749	3888	0	10595	1075	334	0	64	196	2749
Vännäs	592	1352	610	0	2596	257	53	0	19	26	610
Värmdö	3484	634	1686	0	4781	767	151	0	35	105	1088
Värnamo	4068	4876	2817	0	7854	563	267	0	63	137	1933
Västervik	4957	4031	2537	0	14180	1355	394	0	45	203	3261
Västerås	16029	5289	13241	0	37694	3684	953	0	195	790	9206
Växjö	10515	6932	6261	0	17425	2170	732	0	130	388	4686
Ydre	531	1061	457	0	882	51	42	0		19	271
Ystad	4124	2213	2253	0	7765	235	193	0	28	129	1945
Åmål	1709	1525	1199	0	4280	288	96	0	7	58	1268
Ånge	776	1926	617	0	5184	563	175	0	7	49	1128
Åre	1000	1623	715	0	2909	266	118	0	13	70	923
Årjäng	1283	1752	1015	0	1856	123	69	0	11	48	1178
Åsele	257	666	277	0	1784	133	30	0	2	14	433
Åstorp	1824	868	845	0	3927	179	39	0	46	81	918
Åtvidaberg	1320	1493	852	0	4748	238	106	0	11	85	789
Älmhult	2319	2197	1008	0	4619	329	152	0	11	67	1169
Älvdalen	804	1414	557	0	2425	207	120	0	6	52	958
Älvkarleby	506	376	526	0	4719	310	64	0	6	31	560
Älvsbyn	408	865	429	0	4078	659	49	0	48	31	638
Ängelholm	7024	3195	3116	0	6797	405	333	0	30	223	2615
Öckerö	1756	1054	1501	0	2035	166	85	0	18	44	712
Ödeshög	730	1153	405	0	1657	108	41	0	9	30	405
Örebro	14418	9546	13462	0	35940	4359	1439	0	1126	736	9428
Örkelljunga	1860	1414	810	0	1732	45	55	0	5	57	842
Örnsköldsvik	4414	8929	4390	0	21922	1351	411	0	101	275	4071
Östersund	6300	6129	4707	0	18699	1927	625	0	58	366	4844
Österåker	5494	825	2879	0	5269	635	241	0	28	211	1451
Östhammar	2123	2641	1480	0	6437	488	214	0	61	135	1721
Östra Göinge	1490	1400	1041	0	5342	338	67	0	22	90	1132
Överkalix	204	453	177	0	2239	336	18	0	4	12	467
Övertorneå	407	913	180	0	1968	468	12	0	2	18	539

## Sheet: 1988
	M	C	FP	KD	S	V	MP	SD	Other	Invalid	Nonvoters
Ale	1842	1811	1722	418	6628	867	891	0	87	179	2077
Alingsås	3461	2589	3340	1087	7857	1065	1386	0	48	227	2841
Alvesta	2004	2798	917	515	4978	473	579	0	24	155	1905
Aneby	632	1045	448	689	1349	91	181	0	4	25	558
Arboga	1319	1040	981	230	4689	504	460	0	98	120	1602
Arjeplog	132	310	198	69	1198	407	122	0	13	19	528
Arvidsjaur	330	476	411	163	3239	632	171	0	36	41	905
Arvika	2231	2621	1848	322	7933	1058	970	0	9	208	3497
Askersund	932	1262	707	364	3809	304	269	0	4	96	1166
Avesta	1380	2110	1263	476	8985	1197	685	0	82	191	2670
Bengtsfors	870	1617	745	264	3414	289	389	0	5	75	1368
Berg	541	1678	316	119	2450	200	241	0	3	40	1135
Bjurholm	277	440	381	125	773	25	57	0	4	11	296
Bjuv	1224	719	748	107	4883	328	327	0	36	91	1320
Boden	2094	1470	1683	551	11072	1470	636	0	136	111	2977
Bollnäs	1632	3007	1857	539	8612	1231	953	0	85	173	3556
Borgholm	1216	2497	543	363	2147	188	449	0	5	77	1210
Borlänge	3138	3069	3083	721	15214	1959	1765	0	271	433	5411
Borås	12560	6561	7908	2474	29827	3033	3263	0	55	576	9383
Botkyrka	6584	1953	4622	592	13875	2632	1920	0	354	584	6869
Boxholm	309	670	199	125	2068	224	148	0	5	48	478
Bromölla	759	523	536	98	4977	384	363	0	9	114	1218
Bräcke	467	980	296	51	3232	310	239	0	6	50	994
Burlöv	1953	405	904	79	4803	361	458	0	148	124	1201
Båstad	2731	2017	1151	151	1799	82	500	0	31	120	1322
Dals-Ed	407	1036	337	167	966	76	226	0	7	29	698
Danderyd	10222	771	3520	304	2861	471	1040	0	58	199	1702
Degerfors	488	636	532	198	4944	684	262	0	23	71	859
Dorotea	121	439	220	51	1422	155	84	0		19	483
Eda	588	1100	392	94	2902	251	198	0	5	48	1080
Ekerö	3447	992	2054	190	2914	509	774	0	22	146	1300
Eksjö	2041	2399	1355	1049	3957	322	533	0	13	98	1856
Emmaboda	840	1644	437	203	3444	270	332	0	23	78	906
Enköping	3682	3804	2432	355	8679	696	899	0	178	306	3850
Eskilstuna	7671	4057	7224	1264	28522	2659	2452	0	645	668	9712
Eslöv	3197	2815	1404	321	8209	375	735	0	100	229	3029
Essunga	831	1156	382	109	1004	95	161	0	4	42	610
Fagersta	946	571	770	100	5531	536	365	0	120	94	1440
Falkenberg	3738	5903	2243	491	8935	671	1322	0	34	376	3422
Falköping	3547	4887	2157	964	7753	753	951	0	23	218	3243
Falun	5944	4385	4715	1079	12975	1726	2022	0	74	452	6514
Filipstad	973	654	694	104	5528	587	370	0	5	92	1635
Finspång	1601	1564	1271	624	8519	841	744	0	26	135	1982
Flen	1423	1552	1011	249	5437	537	565	0	47	137	1587
Forshaga	813	854	690	146	4180	329	303	0	11	75	1094
Färgelanda	582	1405	424	103	1809	103	260	0	2	63	758
Gagnef	659	1372	551	275	2654	259	407	0	9	94	1013
Gislaved	2867	3413	2046	973	7069	475	659	0	34	216	2469
Gnosjö	988	795	769	823	1957	185	191	0	11	55	739
Gotland	4880	9079	2871	555	14926	1508	2485	0	58	492	6094
Grums	608	888	416	87	3793	396	246	0	8	46	1170
Grästorp	810	1073	412	104	1130	90	190	0	4	47	615
Gullspång	604	805	340	129	1805	152	200	0	6	37	729
Gällivare	1277	692	736	190	8019	2361	512	0	278	81	3619
Gävle	7190	4230	7438	1285	29989	3694	3145	0	398	604	10349
Göteborg	55214	12972	46299	7060	100938	24523	21341	0	3627	4122	50373
Götene	1270	1461	1029	516	3386	314	392	0	3	99	1177
Habo	1002	791	722	616	1819	133	236	0	1	57	705
Hagfors	865	1306	500	143	7262	918	415	0	3	72	1499
Hallsberg	1038	1477	1029	361	5707	702	427	0	37	125	1528
Hallstahammar	1081	687	956	164	6059	820	317	0	147	107	1726
Halmstad	9858	5569	6648	955	22412	2206	2930	0	152	598	7710
Hammarö	1340	580	972	75	4728	526	367	0	8	98	987
Haninge	6899	2078	5264	553	14113	2537	1975	0	267	565	6319
Haparanda	641	756	206	101	2687	294	160	0	58	28	1205
Heby	759	2199	664	266	3603	445	315	0	24	135	1465
Hedemora	1211	1733	961	310	5045	704	598	0	53	151	1878
Helsingborg	15675	3988	8839	1163	29929	2714	4498	0	1069	1055	12876
Herrljunga	1028	1756	702	304	1906	210	357	0	6	58	764
Hjo	1123	886	694	343	2298	197	260	0	6	57	885
Hofors	521	621	493	77	5033	848	294	0	64	37	1282
Huddinge	9951	2196	6288	711	15153	3152	2401	0	365	687	7250
Hudiksvall	2011	4736	1948	837	10574	1951	1559	0	42	241	5015
Hultsfred	1477	2325	707	549	5153	453	366	0	14	115	1763
Hylte	830	1872	635	163	2898	117	369	0	6	70	1115
Håbo	2332	648	1121	121	3190	372	334	0	42	146	1251
Hällefors	460	418	410	80	3868	559	280	0	1	58	1169
Härjedalen	728	1131	601	103	4550	488	391	0	15	74	1878
Härnösand	2535	3284	1734	504	7666	1126	1156	0	26	182	2981
Härryda	3107	1585	2988	357	5487	881	1180	0	63	162	2241
Hässleholm	6130	5489	3121	1241	12592	904	1590	0	140	376	5466
Höganäs	4280	1246	1834	356	5315	379	992	0	64	177	2079
Högsby	612	1071	301	235	2195	250	194	0	4	53	705
Hörby	1547	2183	982	343	2536	130	369	0	62	116	1601
Höör	1782	1368	829	187	2479	131	530	0	50	94	1372
Jokkmokk	310	221	381	75	2486	449	252	0	18	33	1133
Järfälla	8608	1630	5938	748	12949	2096	1876	0	307	495	4574
Jönköping	12027	6479	8788	7904	30327	2932	2922	0	480	783	9877
Kalix	866	1221	756	187	7986	780	417	0	158	71	1897
Kalmar	7153	4292	3728	1033	16706	1656	1767	0	99	428	5895
Karlsborg	826	903	614	166	2516	162	296	0	8	49	674
Karlshamn	2506	1938	1877	583	11381	1294	1160	0	26	267	3289
Karlskoga	3280	1396	2619	494	12743	1682	651	0	86	250	3535
Karlskrona	5994	4462	4310	1217	19329	1836	1989	0	93	418	5636
Karlstad	10072	5219	6335	922	22246	2628	2617	0	81	609	8408
Katrineholm	2662	2398	2077	719	11066	881	1055	0	120	254	2937
Kil	1189	1142	865	130	3200	316	376	0	8	107	1158
Kinda	947	1748	616	401	2421	183	292	0	11	89	991
Kiruna	1112	568	972	260	9288	2485	438	0	185	107	4063
Klippan	2114	1527	997	197	4173	280	519	0	47	170	2173
Kramfors	1322	3147	765	496	9241	1288	868	0	119	167	2287
Kristianstad	9208	4834	5724	888	21205	1409	2442	0	101	593	7896
Kristinehamn	2340	1785	2168	353	8599	1044	730	0	21	206	2965
Krokom	850	2102	569	228	4081	392	420	0	5	78	1561
Kumla	1256	1481	1319	608	5814	702	422	0	22	138	1718
Kungsbacka	9027	4389	6554	603	8981	993	2053	0	91	346	4305
Kungsör	643	681	635	98	2543	301	310	0	36	64	759
Kungälv	3852	2704	3220	644	8083	971	1388	0	96	272	2777
Kävlinge	2791	1376	1467	92	6498	389	699	0	129	184	1705
Köping	1742	1730	1593	416	8477	1112	781	0	305	188	3016
Laholm	2503	4094	1290	258	4395	336	772	0	18	207	2283
Landskrona	4993	1193	2077	206	11997	847	1132	0	208	298	3733
Laxå	399	561	459	237	2765	298	200	0	3	71	865
Leksand	1347	1964	1015	677	3259	324	572	0	14	120	1606
Lerum	4198	1894	4003	609	6340	1034	1568	0	42	282	2337
Lessebo	649	665	383	132	3192	496	239	0	1	54	644
Lidingö	11365	1189	5051	316	5035	989	1551	0	77	308	2981
Lidköping	3406	3497	2790	887	10028	1272	1162	0	21	232	3803
Lilla Edet	782	1188	690	199	3562	456	448	0	19	78	1241
Lindesberg	1748	2609	1522	595	7466	861	805	0	21	186	2711
Linköping	15895	8270	10199	3137	32118	4336	4651	0	545	1009	11319
Ljungby	2566	3823	1489	897	6690	675	1001	0	17	220	2974
Ljusdal	1122	2349	1246	361	6522	1030	577	0	103	91	3219
Ljusnarsberg	336	406	319	98	2302	396	221	0	4	47	845
Lomma	3818	736	1714	124	3796	211	656	0	113	161	1021
Ludvika	1810	1593	1476	413	10977	1792	1030	0	42	261	3461
Luleå	4561	3510	4530	913	23768	4116	2063	0	471	306	6728
Lund	12684	3737	7985	802	18347	3969	5647	0	537	923	6953
Lycksele	747	854	1118	828	4719	509	267	0	30	71	1506
Lysekil	1274	698	1431	232	5089	443	544	0	26	150	1492
Malmö	40490	4908	15357	2037	69522	6406	8085	0	4634	2139	25428
Malung	1053	1424	839	120	3694	284	339	0	9	99	1266
Malå	166	254	346	151	1472	188	75	0	10	25	451
Mariestad	2657	2072	1922	560	6855	775	840	0	51	199	2894
Mark	3083	3707	1755	677	9652	877	1066	0	12	212	2672
Markaryd	1011	1191	531	354	3061	269	351	0	10	83	1248
Mellerud	1012	1893	629	287	2319	142	419	0	15	64	1234
Mjölby	2390	2559	1584	606	8091	756	550	0	29	261	2694
Mora	1693	2472	1375	338	4844	601	759	0	15	133	3036
Motala	3294	2741	2981	774	14065	1418	1277	0	60	353	4215
Mullsjö	717	671	484	555	1498	136	223	0	8	64	482
Munkedal	902	1595	733	239	2686	213	356	0	21	75	1290
Munkfors	192	336	203	41	2351	187	95	0	7	19	433
Mölndal	5782	2457	6080	926	12660	2252	2061	0	249	432	4810
Mönsterås	1158	1641	535	329	4210	471	335	0	3	72	1188
Mörbylånga	1580	2042	739	181	3140	222	362	0	32	72	1175
Nacka	11831	1535	6158	512	11041	2558	2214	0	444	483	5504
Nora	795	690	738	224	3119	370	375	0	16	97	1093
Norberg	414	345	281	43	2404	415	194	0	46	66	611
Nordanstig	444	1825	523	382	3181	472	481	0	2	71	1442
Nordmaling	563	1106	485	316	2443	163	153	0	4	24	697
Norrköping	15167	6150	8237	2048	35040	4246	3909	0	218	981	14056
Norrtälje	5045	4558	3053	524	11457	1405	1427	0	61	344	4915
Norsjö	209	601	432	166	1742	204	91	0	40	34	676
Nybro	1828	2738	963	514	6514	610	503	0	34	145	2065
Nyköping	7588	5077	4815	987	19573	1890	2412	0	161	463	5955
Nynäshamn	2097	1032	1591	259	6626	1023	952	0	39	182	2047
Nässjö	2955	3154	1999	1889	9411	689	620	0	49	161	2698
Ockelbo	295	894	268	97	2176	257	201	0	4	42	839
Olofström	889	978	738	335	5325	479	452	0	8	128	1491
Orsa	551	827	503	153	1828	257	347	0	7	44	1120
Orust	1353	1550	1288	197	2974	299	564	0	37	107	1485
Osby	1286	1386	782	356	4088	306	402	0	26	102	1606
Oskarshamn	2784	1964	1597	951	8866	966	669	0	22	232	2742
Ovanåker	649	2271	836	523	3873	297	453	0	8	89	1360
Oxelösund	939	414	739	86	4799	735	418	0	51	62	1216
Pajala	431	517	279	156	2727	982	110	0	139	31	1190
Partille	3889	1144	3791	628	6784	1320	1345	0	89	209	2766
Perstorp	840	561	450	113	2067	88	212	0	57	62	827
Piteå	1562	2669	1673	1044	16461	1705	796	0	128	175	2989
Ragunda	297	959	227	75	2662	247	241	0	4	29	838
Robertsfors	393	1564	521	279	1853	179	167	0	11	40	714
Ronneby	2408	2639	1654	332	10124	803	1013	0	19	208	2825
Rättvik	985	1312	881	335	2551	282	416	0	16	65	1934
Sala	1835	2732	1638	393	5619	632	688	0	24	268	2390
Salem	1888	420	1135	172	2400	432	434	0	20	91	1052
Sandviken	2586	2603	2284	564	15628	2000	1019	0	226	230	3919
Sigtuna	4219	1419	2537	297	6883	966	867	0	42	245	3194
Simrishamn	2826	2057	1218	183	5359	293	662	0	110	176	2746
Sjöbo	2147	2618	722	83	3687	173	557	0	83	204	1389
Skara	2096	1851	1355	360	5037	419	729	0	19	125	1877
Skellefteå	3510	6915	5307	2430	25688	2635	1685	0	352	373	7619
Skinnskatteberg	272	353	184	44	1929	217	146	0	16	30	562
Skurup	1627	1624	713	89	3285	145	387	0	83	154	1360
Skövde	5025	3877	3836	1083	12721	1376	1480	0	49	347	4761
Smedjebacken	639	939	567	137	5033	618	327	0	21	112	1385
Sollefteå	1361	2355	853	441	10133	1038	1056	0	9	158	2359
Sollentuna	8950	1747	5499	800	9393	1731	1992	0	164	422	4061
Solna	10273	1530	5336	606	12063	2804	2025	0	324	476	6979
Sorsele	203	369	242	220	1063	92	106	0	17	15	538
Sotenäs	963	641	1023	206	2713	234	342	0	8	62	1042
Staffanstorp	3233	1084	1424	116	4232	197	607	0	127	167	1117
Stenungsund	1984	1416	1805	296	4169	449	682	0	32	163	1796
Stockholm	119567	18195	62511	7834	145524	44339	29894	0	4626	6627	79613
Storfors	386	405	242	51	1994	195	123	0	4	25	453
Storuman	583	571	658	444	2273	181	240	0	12	47	1153
Strängnäs	3389	1603	2702	311	6650	712	839	0	57	191	2532
Strömstad	857	1025	812	149	2571	194	421	0	11	71	1333
Strömsund	724	1965	609	221	6239	578	419	0	8	72	1929
Sundbyberg	3906	813	2715	302	8444	1881	1140	0	227	339	3697
Sundsvall	6760	7390	6947	1929	30416	3919	3011	0	650	629	10405
Sunne	1424	2619	830	167	3234	201	353	0	5	87	1597
Surahammar	523	340	569	126	4240	534	243	0	26	70	1040
Svalöv	1473	1538	622	137	3407	163	386	0	123	131	1225
Svedala	2266	1006	1056	155	4991	188	501	0	258	150	1172
Svenljunga	1287	1735	718	222	2510	172	396	0	2	77	1061
Säffle	1717	2555	1115	330	4987	444	470	0	13	118	2301
Säter	849	1534	698	229	2925	362	366	0	7	125	1293
Sävsjö	1347	1808	668	1038	2193	149	257	0	18	43	1094
Söderhamn	1489	2194	1363	394	11559	1744	838	0	138	217	3365
Söderköping	1496	1722	779	260	2882	244	545	0	5	82	1275
Södertälje	8161	3449	6229	814	19493	3021	2914	0	482	613	9234
Sölvesborg	1776	1103	887	279	5253	301	621	0	13	127	1617
Tanum	1311	1817	1150	135	1999	156	545	0	25	112	1560
Tibro	939	1039	1086	358	3052	277	295	0	7	58	1102
Tidaholm	1123	1428	851	312	4267	331	348	0	34	102	1197
Tierp	1064	2515	1153	296	7280	397	451	0	108	148	1876
Timrå	672	1500	931	345	7083	1009	433	0	25	84	1912
Tingsryd	1605	2500	590	345	3353	331	370	0	20	100	1656
Tjörn	1631	818	1886	746	2217	228	558	0	5	70	1454
Tomelilla	1654	1815	582	125	2948	129	355	0	27	132	1702
Torsby	1318	1675	644	150	5033	698	422	0	5	103	1798
Torsås	745	1565	336	227	1906	92	235	0	10	43	801
Tranemo	1253	1954	766	185	3212	193	363	0	4	96	890
Tranås	1957	1335	1285	1139	5387	408	467	0	17	155	1770
Trelleborg	4211	2102	1747	268	12055	557	1123	0	208	293	3541
Trollhättan	4110	2861	3761	712	16585	1817	1818	0	52	358	5239
Tyresö	5123	1021	3261	358	7052	1483	1169	0	130	322	2717
Täby	13971	1824	6940	564	7860	1291	1929	0	224	436	3849
Töreboda	1042	1604	528	219	2461	230	306	0	8	68	1339
Uddevalla	4333	3416	3733	939	14318	1466	1799	0	273	408	5183
Ulricehamn	2740	3475	1823	639	4891	298	802	0	23	159	2023
Umeå	6041	6462	7457	2253	24972	4259	3683	0	587	543	8417
Upplands-Väsby	4364	1071	3098	326	7801	1237	1203	0	121	341	3357
Upplands-Bro	2400	727	1610	258	4664	725	564	0	24	169	1771
Uppsala	20335	9931	15416	2163	36340	7554	6728	0	1084	1386	15711
Uppvidinge	774	1599	467	248	3165	377	266	0	4	70	1109
Vadstena	959	764	516	188	2253	169	243	0	4	73	680
Vaggeryd	1167	1205	707	1076	3188	320	195	0	15	60	892
Valdemarsvik	833	1181	391	144	2709	189	230	0	7	59	833
Vallentuna	3731	1185	1867	282	3527	580	866	0	67	226	1757
Vansbro	563	1067	464	241	2347	239	280	0	5	91	1016
Vara	2458	3101	1061	310	3182	226	487	0	11	125	1825
Varberg	4825	6398	3339	837	12261	1111	1600	0	44	532	4496
Vaxholm	1280	301	747	50	1307	230	320	0	8	65	538
Vellinge	7886	1137	2248	230	4690	175	878	0	160	173	1534
Vetlanda	2751	3937	1746	2001	6473	513	713	0	25	149	2830
Vilhelmina	303	705	649	340	2857	277	239	0	10	25	1072
Vimmerby	1603	2927	647	357	4093	341	414	0	12	115	1608
Vindeln	470	944	604	287	1628	115	190	0	14	23	736
Vingåker	670	913	641	200	3187	259	398	0	19	85	881
Vårgårda	1053	1575	861	489	1738	171	336	0	24	54	802
Vänersborg	3665	3443	3009	683	9710	1266	1545	0	36	300	4012
Vännäs	416	1107	484	292	2473	291	194	0	19	41	809
Värmdö	3182	744	1652	158	4604	859	693	0	64	178	1842
Värnamo	3272	3142	2270	2272	7657	575	769	0	105	177	2785
Västervik	3843	3655	2151	607	12718	1553	1166	0	20	279	4482
Västerås	12769	4601	11904	1709	34535	3715	3330	0	551	1056	13828
Växjö	8800	6277	5228	1534	17185	2337	2533	0	72	574	6509
Ydre	372	849	338	230	806	61	170	0	2	39	370
Ystad	3758	2042	1596	145	7611	353	767	0	64	219	2648
Åmål	1255	1478	822	221	4115	344	371	0		88	1634
Ånge	546	1599	489	232	4515	631	482	0	13	89	1560
Åre	689	1442	687	151	2641	293	374	0	11	55	1181
Årjäng	784	1900	575	249	1708	136	250	0	5	45	1611
Åsele	158	487	223	136	1676	108	100	0	5	20	468
Åstorp	1543	794	622	149	3781	188	291	0	46	95	1456
Åtvidaberg	976	1269	667	304	4585	229	369	0	10	79	1038
Älmhult	1740	1879	782	384	4459	339	539	0	11	69	1545
Älvdalen	443	1144	526	122	2322	198	373	0	6	72	1237
Älvkarleby	386	361	510	68	4171	385	194	0	21	55	806
Älvsbyn	293	700	329	231	3890	656	169	0	47	30	854
Ängelholm	6387	3015	2385	442	6776	442	1247	0	58	367	3686
Öckerö	1586	341	1124	910	1994	214	486	0	2	72	935
Ödeshög	579	887	307	302	1533	113	162	0	4	38	515
Örebro	11738	7921	11949	3036	33775	4972	3914	0	896	1006	12371
Örkelljunga	1530	1024	634	365	1622	79	278	0	24	94	1203
Örnsköldsvik	3046	6586	3636	2293	20571	1366	1856	0	164	410	5604
Östersund	4810	5506	4224	735	17416	2244	1981	0	51	459	6861
Österåker	4986	1103	2883	195	5185	828	1023	0	75	250	2390
Östhammar	1717	2506	1222	221	5920	618	542	0	133	168	2391
Östra Göinge	1122	1070	801	291	5185	350	398	0	27	125	1566
Överkalix	140	446	113	17	2008	302	79	0	37	22	587
Övertorneå	333	731	185	90	1758	396	77	0	47	21	703

## Sheet: 1991
	M	C	FP	KD	S	V	MP	SD	Other	Invalid	Nonvoters
Ale	2815	1280	1313	1116	5906	817	431	0	1324	305	1888
Alingsås	4340	1878	2423	2726	7219	961	871	0	1608	369	2583
Alvesta	2160	2291	605	1118	4298	448	345	0	1199	216	1757
Aneby	680	753	266	1096	1232	70	125	0	322	42	541
Arboga	1636	801	835	635	4303	396	331	0	562	186	1535
Arjeplog	234	282	134	130	1166	262	52	0	123	38	509
Arvidsjaur	478	494	337	274	2979	515	60	0	194	78	952
Arvika	2854	1999	1340	1221	6969	939	547	0	1244	286	3273
Askersund	1149	1017	483	735	3401	246	177	0	561	122	1204
Avesta	1896	1852	907	907	8041	986	389	0	1056	270	2666
Bengtsfors	1120	1211	482	770	2956	248	173	0	570	110	1353
Berg	582	1531	206	258	2241	190	140	0	364	61	1177
Bjurholm	281	378	298	199	695	34	35	0	80	13	324
Bjuv	1676	535	521	367	4002	250	115	0	900	185	1338
Boden	2764	1315	1415	973	10728	1337	457	0	629	172	2920
Bollnäs	2334	2655	1386	1225	7576	1135	715	0	1173	298	3272
Borgholm	1500	2143	312	679	1855	173	272	0	602	84	1245
Borlänge	4494	2375	2280	1739	14031	1557	937	0	2226	601	5150
Borås	14554	4778	5851	6286	25901	2533	1810	0	4361	1055	9112
Botkyrka	8612	1194	3657	1793	12306	1736	1249	0	2902	669	6577
Boxholm	382	540	149	319	1872	180	84	0	201	97	515
Bromölla	1004	422	422	312	4432	364	191	0	662	197	1261
Bräcke	579	906	244	160	2905	283	133	0	290	69	1072
Burlöv	2207	298	701	355	4050	249	225	0	895	152	1190
Båstad	3288	1543	776	682	1486	71	265	0	966	126	1337
Dals-Ed	522	821	197	483	828	65	109	0	286	33	630
Danderyd	10169	483	2511	1020	2294	284	667	0	1408	144	1439
Degerfors	662	494	413	379	4591	571	159	0	422	90	898
Dorotea	154	370	174	103	1242	208	42	0	125	41	489
Eda	734	868	299	355	2487	250	108	0	404	74	996
Ekerö	4234	807	1623	621	2600	330	628	0	1101	218	1174
Eksjö	2363	1944	881	1843	3534	260	325	0	690	185	1707
Emmaboda	983	1283	327	469	3104	231	213	0	462	134	965
Enköping	4955	2982	1846	1330	8001	587	608	0	1639	485	3711
Eskilstuna	9595	3099	5357	3236	25397	2169	1465	0	4445	930	9574
Eslöv	4035	2150	982	871	7171	322	376	0	1755	306	3008
Essunga	849	895	264	364	888	81	80	0	439	45	551
Fagersta	1184	388	602	460	4950	428	185	0	640	124	1455
Falkenberg	4836	4949	1650	1822	7906	592	785	0	1795	503	3305
Falköping	4748	3218	1311	2559	6511	841	588	0	1668	315	2867
Falun	7373	3470	3349	2510	11513	1273	1316	0	2900	615	6244
Filipstad	1184	503	450	352	4947	532	192	0	506	167	1625
Finspång	1855	1135	991	1254	7650	767	416	0	1027	213	1866
Flen	1682	1273	750	691	4886	443	339	0	701	213	1646
Forshaga	1152	730	570	397	3740	287	172	0	576	90	1022
Färgelanda	715	1041	321	362	1610	109	108	0	480	78	732
Gagnef	876	1115	379	575	2468	200	305	0	534	136	1055
Gislaved	3406	2686	1482	1938	6280	378	371	0	1143	364	2359
Gnesta	1080	842	434	335	1881	207	244	0	541	82	886
Gnosjö	1135	610	435	1312	1744	111	71	0	455	65	688
Gotland	6105	7532	2421	1830	13208	1374	1556	0	2432	789	6132
Grums	774	680	276	327	3486	323	105	0	625	76	1063
Grästorp	925	802	256	390	927	88	101	0	413	52	565
Gullspång	654	611	227	348	1538	184	130	0	382	63	709
Gällivare	1491	546	678	431	7499	2113	293	0	459	150	3592
Gävle	9399	3024	6068	3263	27448	2896	1991	0	4153	975	9657
Göteborg	67603	8508	32743	19733	89658	18454	12251	0	21456	5467	46041
Götene	1527	1248	649	1001	2936	320	221	0	749	138	1093
Habo	1208	522	447	1164	1667	128	165	0	484	76	665
Hagfors	1010	1029	413	409	6540	872	201	0	551	121	1619
Hallsberg	1261	1123	786	891	5087	596	222	0	830	165	1607
Hallstahammar	1256	459	760	475	5594	573	183	0	877	169	1633
Halmstad	12322	4306	4772	3320	19847	1651	1779	0	3820	938	7573
Hammarö	1704	416	807	395	4066	408	240	0	589	142	986
Haninge	9691	1438	4122	1526	12289	1671	1194	0	3519	771	5719
Haparanda	706	771	200	164	2522	242	90	0	137	45	1404
Heby	1045	1703	446	749	3230	314	206	0	756	153	1475
Hedemora	1530	1408	672	693	4600	592	404	0	778	211	1746
Helsingborg	19397	2716	6174	4944	24783	1982	1994	0	7208	1276	12392
Herrljunga	1164	1260	446	877	1696	186	176	0	499	105	742
Hjo	1269	643	464	755	1977	147	181	0	476	102	848
Hofors	685	445	418	251	4597	693	166	0	310	127	1268
Huddinge	12335	1358	4855	1945	13059	2078	1552	0	4376	875	6554
Hudiksvall	2791	4026	1558	1773	9613	1580	1119	0	1644	381	4837
Hultsfred	1578	1893	537	1096	4609	459	176	0	616	145	1746
Hylte	1061	1488	445	606	2579	112	239	0	422	102	1129
Håbo	3076	457	816	399	2741	274	186	0	1022	160	1228
Hällefors	624	379	294	250	3474	411	143	0	317	106	1198
Härjedalen	976	1029	445	240	4124	397	216	0	632	115	1677
Härnösand	3544	2335	1390	1298	7017	803	765	0	1141	209	2814
Härryda	4251	1071	2263	1217	5009	670	709	0	1416	315	1974
Hässleholm	7017	3958	2056	3058	10454	702	796	0	3612	510	5154
Höganäs	4741	878	1300	1276	4656	322	465	0	1312	180	1996
Högsby	631	841	159	438	1902	237	93	0	375	62	702
Hörby	1815	1552	571	835	2102	128	216	0	1426	111	1546
Höör	2103	990	592	637	2175	135	300	0	1067	99	1360
Jokkmokk	508	189	325	156	2281	447	151	0	157	70	940
Järfälla	10752	986	4728	2039	10798	1466	1317	0	2878	608	4144
Jönköping	14666	4805	5972	12519	26697	2402	2008	0	4127	1213	9275
Kalix	1088	1071	737	411	7717	771	267	0	313	135	1977
Kalmar	8526	3343	2843	2650	14686	1313	1258	0	2860	650	5298
Karlsborg	1107	679	399	538	2049	143	150	0	401	81	693
Karlshamn	3315	1527	1438	1244	10329	1083	688	0	1276	419	3116
Karlskoga	3937	907	1967	1272	11210	1201	403	0	1576	338	3385
Karlskrona	7970	3650	3395	2717	16742	1589	1058	0	2455	637	5398
Karlstad	12266	3732	4901	3606	19397	2166	1725	0	3949	710	7470
Katrineholm	3296	1997	1768	1433	10168	752	658	0	1183	384	2873
Kil	1557	912	607	624	2812	283	233	0	687	100	1095
Kinda	1081	1367	382	893	2159	197	170	0	449	142	1102
Kiruna	1521	452	890	535	8952	2169	299	0	555	133	3851
Klippan	2569	1125	608	674	3329	228	235	0	1176	227	2191
Kramfors	1727	2494	598	1062	8749	1119	428	0	575	218	2370
Kristianstad	11462	3470	4018	2861	17803	1107	1162	0	4633	889	7899
Kristinehamn	2744	1329	1537	1050	7683	806	421	0	1491	217	2745
Krokom	1078	1943	457	497	3733	371	334	0	448	147	1613
Kumla	1817	1168	1008	1184	5205	600	240	0	889	183	1662
Kungsbacka	12161	3359	4655	2440	7873	766	1076	0	3478	505	3682
Kungsör	902	508	529	295	2322	231	197	0	386	90	798
Kungälv	5213	2136	2336	1809	7425	915	791	0	1805	415	2474
Kävlinge	3866	991	1181	612	5881	288	351	0	1467	310	1736
Köping	2372	1307	1213	1087	7841	896	436	0	1012	240	2907
Laholm	3244	3144	917	932	3854	264	486	0	1362	268	2328
Landskrona	6017	1003	1508	953	10368	681	465	0	1917	382	3830
Laxå	480	434	391	442	2270	247	104	0	347	105	837
Leksand	1768	1459	792	1147	3089	298	333	0	804	152	1644
Lerum	5749	1212	2760	2042	5599	860	943	0	1816	386	2078
Lessebo	788	602	330	289	2877	374	144	0	369	113	689
Lidingö	11873	752	3694	1315	4186	553	1045	0	1976	292	2625
Lidköping	4299	2852	1985	2039	8916	1256	640	0	1785	325	3428
Lilla Edet	1096	1004	515	505	3172	404	196	0	734	117	1246
Lindesberg	2160	1943	1183	1336	6830	722	476	0	1106	253	2625
Linköping	20286	5623	8835	7999	26815	3288	2829	0	5879	1792	11043
Ljungby	2941	2887	1111	2074	5771	540	507	0	1699	286	2691
Ljusdal	1500	2030	1064	834	5868	891	377	0	833	202	3030
Ljusnarsberg	418	364	232	209	2029	354	119	0	374	47	813
Lomma	4416	481	1270	662	3286	127	335	0	986	208	935
Ludvika	2281	1162	1150	979	10093	1258	498	0	1459	373	3385
Luleå	6167	2769	4364	2130	22875	3481	1494	0	1487	576	6726
Lund	15918	2859	7819	3044	16182	3034	3910	0	3464	1221	6536
Lycksele	891	757	878	1133	4233	558	157	0	327	98	1624
Lysekil	1565	572	1035	552	4742	402	310	0	703	186	1396
Malmö	47976	3267	11011	6827	57800	4860	4393	0	12007	2914	26315
Malung	1335	1126	638	400	3251	255	169	0	645	122	1135
Malå	251	220	236	213	1383	163	38	0	74	29	472
Mariestad	3140	1480	1157	1502	6126	658	497	0	1383	267	2641
Mark	3622	3057	1339	1910	8684	756	573	0	1402	377	2593
Markaryd	1134	874	332	730	2468	227	160	0	780	107	1152
Mellerud	1194	1525	392	687	1988	148	209	0	640	107	1075
Mjölby	3020	1753	1208	1581	7088	584	362	0	1312	380	2614
Mora	2274	1850	923	842	4284	419	485	0	1415	242	2961
Motala	4327	1895	2195	1916	12862	1094	683	0	1863	484	4150
Mullsjö	863	459	334	968	1274	123	153	0	361	59	458
Munkedal	1101	1256	457	631	2410	220	176	0	679	84	1309
Munkfors	258	290	178	108	2095	204	54	0	139	33	448
Mölndal	8056	1749	4626	2509	11084	1634	1210	0	2580	652	4379
Mönsterås	1291	1298	384	717	3737	416	190	0	697	118	1261
Mörbylånga	1863	1692	565	566	2797	230	267	0	832	102	1113
Nacka	14007	1047	5174	1668	10258	1678	1749	0	3182	610	5199
Nora	1024	596	536	501	2778	370	227	0	553	95	1091
Norberg	495	287	227	149	2223	387	140	0	269	77	656
Nordanstig	648	1587	448	617	2826	392	325	0	430	126	1433
Nordmaling	597	886	379	509	2306	156	78	0	239	47	852
Norrköping	17949	4314	5772	5660	30092	3318	2241	0	6690	1372	12952
Norrtälje	6877	3892	2451	1584	10157	1042	918	0	2534	453	4867
Norsjö	238	600	312	265	1541	199	77	0	133	40	672
Nybro	2223	2169	625	1088	5863	490	280	0	1048	219	1984
Nyköping	6269	2886	2633	2131	13629	1100	887	0	2558	465	4187
Nynäshamn	3193	785	1223	622	5798	739	551	0	1289	254	2015
Nässjö	3431	2358	1338	3093	8162	680	559	0	1154	304	2579
Ockelbo	475	727	191	249	1998	224	114	0	241	63	765
Olofström	1228	834	613	610	4703	415	270	0	403	188	1617
Orsa	660	665	341	361	1626	248	217	0	506	50	958
Orust	1814	1266	1029	732	2709	335	309	0	833	153	1412
Osby	1363	1035	494	785	3547	265	211	0	986	154	1475
Oskarshamn	3213	1463	1138	1763	7803	817	423	0	1362	291	2544
Ovanåker	869	1866	589	1125	3433	321	270	0	470	137	1337
Oxelösund	1061	309	520	316	4465	524	207	0	781	92	1149
Pajala	420	436	231	248	2603	967	68	0	219	60	1171
Partille	5031	825	2735	1679	5845	912	696	0	1771	331	2476
Perstorp	935	438	307	341	1694	83	86	0	514	94	805
Piteå	2055	2255	1666	1621	16287	1552	524	0	927	319	3053
Ragunda	389	883	145	198	2364	210	129	0	272	53	842
Robertsfors	468	1388	394	461	1771	165	104	0	175	79	706
Ronneby	3288	2172	1300	967	9101	738	500	0	1179	263	2714
Rättvik	1310	965	580	598	2351	206	252	0	834	109	1741
Sala	2268	2103	1203	1174	4959	479	426	0	1466	301	2199
Salem	2240	331	1016	452	2103	282	351	0	651	144	971
Sandviken	3149	1931	1828	1201	14353	1554	703	0	1856	396	3930
Sigtuna	5455	991	1998	968	5950	603	593	0	1600	357	3243
Simrishamn	3180	1444	860	781	4456	272	381	0	1559	211	2638
Sjöbo	2034	713	425	457	2872	137	259	0	3362	135	1821
Skara	2589	1445	1025	1035	4224	376	494	0	1012	194	1747
Skellefteå	4400	6462	4415	4076	24871	2351	1110	0	1485	592	7322
Skinnskatteberg	367	278	181	163	1702	220	93	0	214	45	508
Skurup	1951	1089	550	421	2737	147	173	0	1327	152	1408
Skövde	6160	2984	2775	2755	10960	973	844	0	2584	549	4636
Smedjebacken	939	763	447	383	4382	525	221	0	664	154	1425
Sollefteå	1873	1920	670	884	9295	954	511	0	644	201	2393
Sollentuna	10531	1125	4402	2137	8172	1126	1493	0	2647	414	3508
Solna	11871	965	4248	1809	10686	1882	1490	0	2729	598	6302
Sorsele	226	319	158	266	914	136	61	0	84	28	568
Sotenäs	1266	501	824	495	2438	192	193	0	442	110	1026
Staffanstorp	3757	724	1129	544	3657	162	278	0	985	195	1199
Stenungsund	2849	1015	1322	897	3602	358	401	0	1106	236	1717
Stockholm	133141	12656	49510	21233	129108	30956	22979	0	33617	7782	73580
Storfors	409	309	198	152	1774	184	42	0	259	34	452
Storuman	634	502	481	649	1868	246	128	0	319	49	1102
Strängnäs	4335	1247	2041	1068	6003	501	533	0	1479	225	2490
Strömstad	1254	874	623	386	2228	207	255	0	436	73	1324
Strömsund	830	1814	514	424	5593	580	248	0	459	136	1911
Sundbyberg	4845	562	2117	846	7398	1324	738	0	1562	373	3439
Sundsvall	9405	5288	5999	3925	28202	3376	2156	0	3664	827	9904
Sunne	1796	2079	572	689	2791	188	222	0	630	106	1581
Surahammar	713	246	430	309	3880	414	154	0	512	80	1069
Svalöv	1678	1219	480	481	2955	134	186	0	736	158	1254
Svedala	2867	712	776	626	4300	189	269	0	1027	236	1225
Svenljunga	1462	1444	575	637	2153	122	189	0	535	133	1050
Säffle	2080	2032	683	896	4429	358	220	0	1119	142	2042
Säter	1218	1269	459	542	2614	330	210	0	721	181	1182
Sävsjö	1458	1355	394	1687	1979	171	135	0	472	78	1157
Söderhamn	2142	1854	1213	920	10463	1254	563	0	1085	260	3391
Söderköping	1957	1322	569	700	2542	216	317	0	832	174	1215
Södertälje	10348	2401	4332	2257	18198	1952	1860	0	3856	745	8831
Sölvesborg	2185	792	657	632	4804	289	292	0	760	184	1590
Tanum	1632	1512	776	548	1791	174	301	0	759	129	1468
Tibro	1246	734	674	897	2568	219	156	0	658	102	1077
Tidaholm	1302	1053	638	759	3799	313	165	0	676	157	1118
Tierp	1419	2029	917	683	6690	383	292	0	871	204	1958
Timrå	1041	1173	828	673	6695	854	239	0	625	120	1948
Tingsryd	1773	2082	379	748	2920	262	251	0	772	162	1622
Tjörn	2023	560	1231	1533	2081	182	254	0	915	130	1245
Tomelilla	1680	1156	388	366	2451	118	181	0	1400	143	1744
Torsby	1665	1438	464	416	4460	619	223	0	526	127	1814
Torsås	866	1253	219	508	1628	88	110	0	426	63	883
Tranemo	1502	1513	610	676	2846	137	184	0	494	150	899
Tranås	2240	1022	794	1730	4745	366	270	0	824	158	1721
Trelleborg	5230	1456	1457	1223	10758	513	560	0	2070	399	3463
Trollhättan	5700	2134	2940	1859	14534	1452	908	0	2494	583	4838
Trosa	1576	495	631	284	1909	185	208	0	591	78	778
Tyresö	6548	680	2456	961	6278	1026	840	0	1784	381	2617
Täby	16218	1136	5369	1878	6504	706	1404	0	2788	470	3397
Töreboda	1163	1244	335	586	2098	209	182	0	661	125	1250
Uddevalla	5429	2645	2591	2445	12528	1379	1024	0	2370	581	5102
Ulricehamn	2969	2715	1266	1881	4126	317	503	0	1202	241	1881
Umeå	7766	5606	6678	4367	24537	3630	3002	0	2791	836	8336
Upplands-Väsby	5831	660	2550	1020	6808	895	741	0	1762	393	3140
Upplands-Bro	3200	481	1109	715	4015	468	336	0	984	180	1681
Uppsala	24651	7381	13770	6447	32080	5565	5699	0	8012	1895	15518
Uppvidinge	922	1339	302	501	2696	356	150	0	532	128	1100
Vadstena	1060	572	404	486	2065	125	126	0	342	106	640
Vaggeryd	1282	920	472	1682	2872	293	143	0	410	79	890
Valdemarsvik	960	943	272	388	2397	168	124	0	484	68	831
Vallentuna	4714	891	1607	822	3222	384	641	0	1233	243	1651
Vansbro	655	897	268	432	2131	220	85	0	380	123	1012
Vara	2683	2129	683	1067	2605	246	268	0	1317	148	1727
Varberg	6351	5308	2565	2420	10861	931	934	0	2234	830	4415
Vaxholm	1649	232	548	175	1168	140	197	0	356	76	463
Vellinge	9317	732	1645	958	3926	131	350	0	1733	228	1447
Vetlanda	3099	3047	1184	3206	5806	421	440	0	1239	235	2566
Vilhelmina	391	628	536	462	2453	370	143	0	252	72	1121
Vimmerby	1822	2446	441	885	3591	284	230	0	752	198	1572
Vindeln	503	827	451	518	1521	117	93	0	203	23	796
Vingåker	828	755	453	476	2947	212	236	0	435	111	907
Vårgårda	1188	1102	537	1233	1617	179	198	0	529	89	795
Vänersborg	4431	2711	2200	2020	8624	1064	787	0	2042	432	3754
Vännäs	489	971	425	475	2313	311	147	0	232	45	879
Värmdö	4144	560	1255	535	4272	639	541	0	1342	237	1787
Värnamo	3920	2532	1538	3531	6772	447	504	0	1079	278	2589
Västervik	4409	3015	1719	1590	11117	1361	785	0	1863	419	4337
Västerås	16538	3055	9308	4903	30606	2837	2179	0	6398	1279	12790
Växjö	10582	5385	4027	3751	14467	1937	1800	0	3689	845	5779
Ydre	424	649	174	485	756	72	87	0	209	40	338
Ystad	4351	1384	1106	728	6262	278	370	0	2127	336	2715
Åmål	1525	1063	638	695	3727	260	175	0	626	155	1549
Ånge	813	1296	333	430	3928	530	323	0	502	107	1662
Åre	939	1329	461	341	2318	249	269	0	473	106	1098
Årjäng	937	1487	556	588	1523	127	157	0	524	56	1376
Åsele	225	419	159	186	1455	130	35	0	99	25	550
Åstorp	2016	562	414	509	3104	130	111	0	853	103	1329
Åtvidaberg	1253	969	543	762	3859	256	203	0	544	168	1070
Älmhult	1977	1534	683	880	3933	269	198	0	790	143	1569
Älvdalen	763	921	319	263	2092	200	165	0	502	98	1141
Älvkarleby	511	246	412	181	3841	306	109	0	437	82	824
Älvsbyn	383	567	323	368	3696	641	112	0	205	34	856
Ängelholm	7337	2168	1786	1715	5536	374	629	0	2572	388	3616
Öckerö	1711	239	814	1648	1814	161	279	0	527	116	825
Ödeshög	642	656	201	614	1307	85	133	0	280	69	510
Örebro	14271	5450	9432	7554	30366	3877	2646	0	5970	1056	11777
Örkelljunga	1634	714	396	882	1329	66	146	0	682	93	1066
Örnsköldsvik	4140	5106	2923	4015	19338	1145	924	0	1881	509	5594
Östersund	6268	5264	3377	1936	15923	1777	1443	0	1986	659	6627
Österåker	6631	814	2363	840	4749	556	738	0	1641	319	2306
Östhammar	2266	2012	1010	593	5628	445	363	0	1115	258	2322
Östra Göinge	1384	846	485	647	4545	303	176	0	976	158	1513
Överkalix	186	393	139	66	1919	312	31	0	65	33	580
Övertorneå	376	699	142	157	1658	357	44	0	103	11	724

## Sheet: 1994
	M	C	FP	KD	S	V	MP	SD	Other	Invalid	Nonvoters
Ale	2693	1198	978	636	7824	1221	761	0	384	265	2012
Alingsås	4530	1744	1971	1715	9079	1423	1539	0	424	316	2730
Alvesta	2524	2116	493	580	5259	681	515	0	297	191	1711
Aneby	764	760	227	756	1581	125	189	0	88	55	563
Arboga	1660	676	623	334	4842	635	542	0	198	173	1449
Arjeplog	206	198	92	68	1332	328	119	0	38	27	474
Arvidsjaur	474	353	212	147	3340	652	149	0	63	47	812
Arvika	2843	1687	1081	595	7966	1384	999	0	264	287	3477
Askersund	1182	878	440	430	4168	445	310	0	104	108	1175
Avesta	1877	1588	722	478	8885	1236	724	0	221	240	2571
Bengtsfors	1218	1008	403	388	3488	339	315	0	84	107	1367
Berg	585	1378	148	120	2530	302	255	0	86	53	1113
Bjurholm	303	375	243	142	774	58	74	0	9	11	285
Bjuv	1633	503	327	165	5245	295	220	0	227	109	1340
Boden	2782	1089	910	575	12169	1871	748	0	247	207	2509
Bollebygd	1201	545	269	278	2225	254	277	0	96	74	564
Bollnäs	2227	2242	1000	603	9222	1423	1134	0	301	254	3326
Borgholm	1728	1839	283	402	2551	276	410	0	164	86	1294
Borlänge	4432	1917	1718	900	16937	2292	1732	0	578	465	4958
Borås	13589	4065	4115	2539	29620	3486	2985	0	951	941	8684
Botkyrka	7959	945	2588	1072	16511	2265	1722	0	994	617	6812
Boxholm	412	494	140	190	2037	252	176	0	57	65	443
Bromölla	944	381	310	210	5143	552	348	0	146	127	1117
Bräcke	543	801	144	62	3257	364	255	0	42	48	964
Burlöv	2012	255	464	165	5201	275	263	0	366	179	1102
Båstad	3674	1559	612	414	2089	143	412	0	264	134	1496
Dals-Ed	546	647	154	284	1162	118	247	0	45	51	659
Danderyd	10985	652	2272	1119	2687	336	614	0	259	175	1627
Degerfors	672	447	332	210	4853	752	240	0	102	70	920
Dorotea	180	279	148	43	1483	135	87	0	19	35	412
Eda	779	758	200	170	2755	364	216	0	79	63	995
Ekerö	4735	904	1294	446	3579	542	797	0	308	228	1432
Eksjö	2456	1846	658	1076	4404	427	620	0	230	137	1717
Emmaboda	1037	1165	243	253	3490	298	321	0	95	100	994
Enköping	5037	2765	1330	719	9870	868	1051	0	476	403	4167
Eskilstuna	9826	2634	3947	1785	29939	3083	2476	0	1548	835	9229
Eslöv	4108	1967	684	396	9049	567	618	0	625	259	3120
Essunga	931	877	203	166	1234	136	173	0	93	40	621
Fagersta	1237	346	465	196	5285	623	312	0	207	101	1417
Falkenberg	5207	4632	1189	909	9953	973	1241	0	611	396	3359
Falköping	4529	3204	1000	1385	8073	1115	1211	0	360	315	3165
Falun	7395	3303	2931	1443	14295	2059	2400	0	620	649	5950
Filipstad	1047	425	358	145	5426	716	246	0	141	106	1480
Finspång	2122	1041	743	785	8309	1109	655	0	317	199	1831
Flen	1867	1003	557	390	5695	669	542	0	201	155	1559
Forshaga	1176	635	459	236	4413	486	318	0	169	100	1021
Färgelanda	733	1026	266	163	2002	195	219	0	68	89	717
Gagnef	933	992	307	333	2996	350	491	0	127	123	997
Gislaved	3756	2500	1146	1167	7806	522	794	0	291	315	2457
Gnesta	1155	783	351	215	2487	327	454	0	120	103	917
Gnosjö	1338	661	323	955	2095	172	189	0	156	83	705
Gotland	6646	6639	1671	937	16089	1926	2486	0	615	682	6104
Grums	839	595	234	174	3902	429	260	0	136	88	1024
Grästorp	1028	771	175	175	1318	175	222	0	84	53	600
Gullspång	700	503	152	220	1912	253	225	0	92	55	666
Gällivare	1400	360	425	233	8566	2480	465	0	284	74	2849
Gävle	9623	2566	4723	1651	31456	3969	3113	0	1159	883	9721
Göteborg	69283	7994	26137	11804	109186	23817	16202	0	7407	4317	47640
Götene	1591	1149	553	612	3742	491	488	0	221	138	1121
Habo	1300	599	359	748	2136	229	275	0	173	113	693
Hagfors	1039	832	314	198	6897	1117	312	0	73	102	1446
Hallsberg	1331	926	643	553	5983	769	422	0	193	160	1447
Hallstahammar	1251	425	510	227	6094	841	324	0	266	131	1575
Halmstad	13293	4017	3618	1703	24785	2481	2441	0	1265	829	7816
Hammarö	1863	337	751	228	4853	611	347	0	116	111	1032
Haninge	9100	1416	2917	940	16400	2424	1887	0	1180	668	5994
Haparanda	653	571	168	117	3031	347	132	0	93	14	1332
Heby	1261	1606	361	402	3986	460	465	0	112	143	1425
Hedemora	1565	1315	512	396	5278	840	598	0	202	183	1778
Helsingborg	20360	3000	4638	1971	31981	2886	2952	0	2937	1009	12755
Herrljunga	1196	1250	388	496	2211	290	370	0	101	123	772
Hjo	1322	613	389	424	2414	275	318	0	122	71	953
Hofors	752	395	271	109	4646	823	273	0	85	95	1212
Huddinge	12451	1346	3782	1229	17721	2780	2115	0	1293	766	6730
Hudiksvall	2870	3338	1039	882	11643	2260	1822	0	469	306	4838
Hultsfred	1584	1784	329	603	5301	710	288	0	165	149	1647
Hylte	1099	1412	357	236	3125	188	268	0	124	90	1098
Håbo	3346	458	657	278	3915	436	398	0	313	218	1399
Hällefors	570	311	229	111	3717	519	254	0	48	72	1009
Härjedalen	947	872	314	135	4664	577	400	0	115	92	1673
Härnösand	3565	2000	1135	696	8259	1197	1216	0	287	230	2815
Härryda	4419	1002	1842	761	6993	1034	1089	0	373	264	2089
Hässleholm	7070	3689	1631	1716	13858	1129	1506	0	936	547	5806
Höganäs	5092	952	1111	629	5836	448	699	0	316	164	2013
Högsby	692	718	116	245	2190	269	164	0	79	63	716
Hörby	2099	1505	382	458	2941	187	379	0	647	129	1606
Höör	2283	992	419	342	3150	255	467	0	346	125	1424
Jokkmokk	334	140	170	62	2711	486	255	0	77	36	783
Järfälla	10880	1090	3548	1340	14114	1982	1712	0	795	615	4431
Jönköping	15270	4968	5361	7938	31952	3745	3010	0	1622	1184	9918
Kalix	1092	873	504	208	8430	1093	361	0	160	93	1649
Kalmar	8885	2978	2243	1417	17751	2046	1876	0	800	614	5410
Karlsborg	1020	594	266	225	2423	242	271	0	132	115	676
Karlshamn	3306	1267	1047	629	11963	1589	1067	0	295	358	2943
Karlskoga	3993	799	1271	636	12315	1622	733	0	446	350	3521
Karlskrona	8295	3215	2359	1497	19651	2523	1787	0	694	669	5457
Karlstad	12803	3328	4355	1994	23438	3369	2581	0	870	723	7272
Katrineholm	3542	1626	1382	701	11638	1015	1264	0	287	329	2933
Kil	1642	814	532	303	3519	435	389	0	146	110	1130
Kinda	1169	1331	302	522	2663	260	381	0	114	123	1063
Kiruna	1501	333	580	320	9550	3135	584	0	296	137	3007
Klippan	2620	1018	397	327	4544	301	340	0	328	201	2040
Kramfors	1727	2130	476	563	9296	1271	677	0	93	173	2249
Kristianstad	11522	3192	2985	1555	23056	1642	1882	0	1427	838	7746
Kristinehamn	2995	1169	1197	547	9004	1255	732	0	257	222	2561
Krokom	1091	1761	334	269	4529	570	598	0	128	101	1454
Kumla	1762	968	823	784	6169	882	481	0	258	172	1706
Kungsbacka	13595	3464	3700	1684	11874	1377	1817	0	862	597	4417
Kungsör	980	476	324	148	2634	387	292	0	136	91	796
Kungälv	5267	2014	1858	1136	9945	1414	1234	0	445	339	2629
Kävlinge	4081	842	890	312	7737	358	488	0	576	317	1753
Köping	2510	1174	827	566	8840	1384	636	0	391	194	2698
Laholm	3442	3081	636	522	5076	508	765	0	414	269	2408
Landskrona	5679	791	1047	379	13036	825	709	0	679	336	3547
Laxå	509	357	267	274	2648	263	189	0	58	78	746
Lekeberg	758	818	239	376	1774	228	241	0	83	73	674
Leksand	2023	1304	588	767	3857	537	764	0	154	150	1610
Lerum	5805	1158	2219	1189	7931	1254	1482	0	464	352	2222
Lessebo	846	516	224	122	3253	449	266	0	84	92	708
Lidingö	12721	1102	3162	1180	5038	745	999	0	396	322	2703
Lidköping	4437	2560	1555	1128	11017	1694	1230	0	393	345	3395
Lilla Edet	1050	877	318	259	4066	664	362	0	212	107	1193
Lindesberg	2407	1820	893	692	8060	1125	815	0	194	234	2441
Linköping	21117	5569	8305	4708	34504	4675	4580	0	2061	1559	11077
Ljungby	3484	2683	865	1212	7213	935	944	0	278	309	2772
Ljusdal	1732	1656	751	336	6861	1116	704	0	160	156	3016
Ljusnarsberg	441	325	169	92	2309	505	175	0	86	41	746
Lomma	4649	432	1081	397	4365	193	376	0	365	211	999
Ludvika	2258	906	859	452	11201	1768	896	0	296	293	3060
Luleå	6126	2211	3344	1313	26767	4480	2049	0	508	378	6139
Lund	18249	3028	7766	1874	21873	3589	4326	0	1297	1215	7282
Lycksele	847	509	757	776	4936	615	366	0	111	81	1584
Lysekil	1623	515	859	248	5542	613	516	0	167	142	1264
Malmö	40454	2933	8350	3621	71442	6513	5364	0	7832	2973	27494
Malung	1335	925	491	189	3755	447	280	0	105	124	1224
Malå	225	164	174	108	1470	308	83	0	45	17	452
Mariestad	3166	1313	859	824	7407	1155	880	0	409	248	2613
Mark	3776	2867	945	1002	10457	1193	997	0	280	364	2690
Markaryd	1217	812	275	436	3099	334	321	0	140	99	1111
Mellerud	1243	1399	301	348	2472	263	455	0	160	103	1161
Mjölby	3083	1736	961	779	8423	936	714	0	280	306	2474
Mora	2332	1423	815	546	5682	735	947	0	224	272	2938
Motala	4393	1769	1634	1019	15088	1590	1295	0	396	418	3967
Mullsjö	898	473	264	677	1709	219	291	0	99	82	438
Munkedal	1160	1107	329	296	3124	359	441	0	149	106	1190
Munkfors	261	239	140	59	2203	251	72	0	50	29	440
Mölndal	8146	1547	3697	1520	14313	2219	1664	0	841	533	4658
Mönsterås	1373	1285	278	356	4577	534	320	0	144	116	1148
Mörbylånga	1968	1511	460	304	3565	374	452	0	208	114	1252
Nacka	15159	1295	4636	1302	12879	2283	2096	0	1020	647	5555
Nora	1093	528	495	287	3404	475	366	0	106	118	1073
Norberg	525	253	170	90	2355	510	187	0	67	66	599
Nordanstig	646	1278	307	338	3226	570	545	0	142	100	1437
Nordmaling	643	723	341	312	2638	242	190	0	60	45	815
Norrköping	18558	3678	4038	2911	35942	4493	3897	0	2782	1172	12719
Norrtälje	7264	3494	1748	958	13320	1727	1694	0	636	541	5199
Norsjö	223	442	236	176	1815	296	135	0	32	19	561
Nybro	2322	1918	438	610	6802	777	497	0	255	216	2012
Nyköping	6431	2454	2089	1266	16663	1662	1455	0	550	445	4169
Nynäshamn	3170	690	920	394	6897	1074	880	0	283	227	2136
Nässjö	3560	2164	1108	1754	9483	1006	867	0	441	273	2589
Ockelbo	454	617	141	122	2209	321	168	0	57	66	796
Olofström	1203	625	439	348	5318	624	393	0	150	157	1579
Orsa	658	566	203	233	1986	392	387	0	95	51	977
Orust	2079	1171	806	344	3824	599	575	0	218	137	1415
Osby	1536	933	386	447	4463	324	378	0	157	145	1398
Oskarshamn	3304	1310	848	1011	9407	1092	653	0	250	317	2548
Ovanåker	877	1663	469	776	4003	422	471	0	86	141	1313
Oxelösund	995	227	386	166	4922	633	314	0	129	95	996
Pajala	442	331	183	177	2911	1093	115	0	142	29	970
Partille	5186	726	2210	1086	7950	1348	1042	0	456	321	2695
Perstorp	951	407	217	157	2184	192	142	0	100	60	822
Piteå	2097	1634	1213	924	18563	2271	859	0	327	217	2861
Ragunda	418	728	94	70	2517	381	245	0	40	37	739
Robertsfors	459	1124	374	315	2063	240	227	0	55	55	710
Ronneby	3592	1813	885	450	10368	1224	779	0	258	260	2784
Rättvik	1394	884	489	295	2964	345	475	0	168	121	1813
Sala	2581	2046	870	580	6180	665	906	0	296	319	2302
Salem	2282	277	772	303	2793	414	463	0	178	146	1003
Sandviken	3352	1750	1358	652	15623	2038	1077	0	340	369	3840
Sigtuna	5523	1060	1450	595	8068	927	846	0	460	350	3214
Simrishamn	3310	1472	588	366	5579	515	528	0	544	222	2605
Sjöbo	2531	1459	309	204	4053	242	346	0	1213	166	1945
Skara	2605	1364	677	506	5140	586	760	0	346	189	1851
Skellefteå	4463	4793	3439	2322	28591	3708	2368	0	389	412	6876
Skinnskatteberg	356	248	115	98	1934	251	162	0	46	30	477
Skurup	2103	1127	391	147	3767	242	319	0	422	148	1447
Skövde	6817	2984	2214	1464	13728	1648	1507	0	653	472	4592
Smedjebacken	962	658	307	142	4999	708	370	0	129	140	1223
Sollefteå	1741	1525	546	459	10023	1160	795	0	153	187	2377
Sollentuna	11459	1245	3891	1461	10542	1454	1674	0	729	483	3744
Solna	12860	1077	3598	1184	12999	2481	1672	0	767	569	6804
Sorsele	209	243	129	158	1043	125	129	0	66	16	575
Sotenäs	1433	424	634	265	2979	272	355	0	79	110	1002
Staffanstorp	3708	691	933	324	5285	241	366	0	478	261	1293
Stenungsund	2866	916	1123	512	5084	634	734	0	298	198	1798
Stockholm	140982	13996	44707	13303	152722	36768	25595	0	10359	7329	76361
Storfors	435	260	160	99	1966	261	101	0	52	39	423
Storuman	638	449	342	370	2291	279	301	0	99	45	1014
Strängnäs	4642	1181	1628	600	7687	856	846	0	368	288	2672
Strömstad	1220	861	433	205	2811	310	405	0	133	93	1254
Strömsund	828	1578	353	204	5969	777	404	0	115	92	1779
Sundbyberg	4789	581	1552	444	8542	1545	910	0	622	389	3560
Sundsvall	9305	4090	4935	1932	33235	4463	3225	0	1087	671	9903
Sunne	1947	1804	441	364	3444	370	429	0	161	121	1637
Surahammar	732	214	341	146	4225	633	274	0	173	78	968
Svalöv	1748	1177	296	201	3764	209	321	0	265	120	1201
Svedala	2902	646	597	317	5794	327	353	0	419	209	1286
Svenljunga	1528	1302	432	296	2808	213	353	0	92	158	1102
Säffle	2099	1864	593	498	5206	509	427	0	189	170	2076
Säter	1241	1166	363	286	3201	507	387	0	198	143	1179
Sävsjö	1510	1373	312	1164	2433	334	260	0	147	84	1232
Söderhamn	2155	1514	847	452	11404	1739	989	0	356	252	3224
Söderköping	2231	1209	408	395	3369	328	515	0	256	132	1268
Södertälje	10534	2065	3266	1414	22707	2523	2732	0	910	767	8757
Sölvesborg	2177	709	448	361	5700	545	404	0	238	188	1677
Tanum	1723	1494	630	243	2430	305	581	0	176	167	1513
Tibro	1291	730	572	558	3198	370	313	0	168	77	1028
Tidaholm	1298	943	519	440	4477	502	321	0	207	135	1113
Tierp	1531	1768	702	381	7605	587	491	0	244	182	1851
Timrå	960	935	614	347	7723	1124	439	0	196	93	1861
Tingsryd	1926	1893	276	372	3609	400	385	0	189	187	1653
Tjörn	2430	552	959	1004	3040	334	470	0	292	157	1347
Tomelilla	1963	1150	300	198	3293	205	285	0	511	136	1625
Torsby	1753	1118	282	229	5141	850	360	0	140	109	1565
Torsås	953	1126	166	280	2055	153	257	0	125	70	860
Tranemo	1635	1480	458	318	3362	225	378	0	104	160	924
Tranås	2391	1029	708	1117	5551	492	537	0	257	145	1668
Trelleborg	5223	1381	907	606	13560	659	774	0	803	398	3384
Trollhättan	5441	1885	2243	1009	17795	2119	1604	0	630	429	4538
Trosa	1637	414	538	213	2599	286	358	0	180	119	776
Tyresö	6644	689	1947	690	8211	1296	1094	0	551	366	2814
Täby	17529	1328	5010	1553	8468	1042	1579	0	583	505	3549
Töreboda	1246	1177	214	325	2613	374	327	0	120	126	1226
Uddevalla	5420	2125	2043	1308	15543	2139	1771	0	910	474	4761
Ulricehamn	3273	2504	1030	939	5282	590	1039	0	265	296	2010
Umeå	8593	4297	5969	2667	30225	5045	4868	0	820	626	8678
Upplands-Väsby	5782	586	1833	601	8751	1169	1074	0	485	368	3261
Upplands-Bro	3082	448	847	544	5100	655	457	0	235	202	1552
Uppsala	26624	6986	12164	5012	42913	7428	7962	0	2349	1750	15336
Uppvidinge	1043	1186	245	223	3163	503	265	0	98	102	1039
Vadstena	1121	527	342	257	2451	201	292	0	68	86	598
Vaggeryd	1545	929	399	1097	3293	421	299	0	122	60	953
Valdemarsvik	1049	894	167	264	2781	209	272	0	181	66	808
Vallentuna	4893	953	1315	570	4493	627	815	0	242	251	1751
Vansbro	641	731	204	263	2494	310	224	0	91	112	1017
Vara	2784	2257	541	497	3398	390	541	0	248	175	1865
Varberg	6769	4989	1871	1289	14111	1728	1439	0	601	702	4556
Vaxholm	1843	308	512	158	1533	219	336	0	90	74	575
Vellinge	9716	768	1302	675	5720	235	468	0	752	348	1603
Vetlanda	3261	2900	972	2045	7119	883	720	0	384	222	2552
Vilhelmina	367	453	444	316	3043	381	266	0	95	40	979
Vimmerby	1815	2204	292	536	4471	505	448	0	265	184	1566
Vindeln	545	671	388	295	1811	167	232	0	53	39	797
Vingåker	966	618	299	243	3346	298	571	0	48	103	757
Vårgårda	1117	1081	473	844	2247	293	449	0	111	89	948
Vänersborg	4260	2411	1667	1055	10961	1584	1391	0	423	363	3705
Vännäs	531	827	333	270	2765	396	280	0	79	26	894
Värmdö	5018	620	1139	375	5881	1007	818	0	350	279	2017
Värnamo	4096	2507	1267	2480	8153	643	884	0	403	265	2505
Västervik	4383	2721	1214	863	13219	1771	1205	0	406	314	4161
Västerås	18067	2474	7231	2707	37819	3972	3559	0	1771	1115	12303
Växjö	11594	4787	3386	2083	19041	3050	2418	0	822	742	6179
Ydre	462	654	155	294	935	97	162	0	41	41	341
Ystad	4605	1346	840	331	8060	440	639	0	598	319	2768
Åmål	1559	943	454	329	4394	415	368	0	109	117	1577
Ånge	783	1025	249	187	4546	708	529	0	111	100	1480
Åre	916	1320	296	188	2748	359	458	0	85	72	1031
Årjäng	934	1454	326	372	1919	251	282	0	113	91	1506
Åsele	218	340	128	119	1620	138	110	0	32	24	479
Åstorp	1765	534	271	259	4329	222	226	0	196	92	1355
Åtvidaberg	1282	912	408	359	4601	389	375	0	151	96	1005
Älmhult	2272	1416	482	494	4700	337	419	0	185	133	1452
Älvdalen	711	886	201	145	2507	287	347	0	77	100	1131
Älvkarleby	536	172	291	72	4373	377	186	0	101	60	783
Älvsbyn	389	412	209	217	4098	817	200	0	87	27	786
Ängelholm	8123	2219	1320	980	7910	694	981	0	639	422	3995
Öckerö	1835	234	654	1327	2501	324	380	0	140	107	927
Ödeshög	754	650	166	308	1600	134	217	0	68	51	495
Örebro	14325	4069	7445	4417	35415	5127	3952	0	1856	1073	11022
Örkelljunga	1608	723	256	574	1983	121	226	0	197	114	1220
Örnsköldsvik	4454	4208	2477	2502	22184	1743	1511	0	393	351	5284
Östersund	6196	4832	2257	1039	19220	2679	2522	0	476	503	6352
Österåker	6919	808	1934	547	6668	843	1046	0	426	351	2390
Östhammar	2405	1746	659	281	6944	637	728	0	322	242	2365
Östra Göinge	1495	751	359	377	5408	434	368	0	179	142	1483
Överkalix	160	354	97	28	2058	373	59	0	37	24	513
Övertorneå	352	588	88	102	1910	442	70	0	76	13	678

## Sheet: 1998
	M	C	FP	KD	S	V	MP	SD	Other	Invalid	Nonvoters
Ale	2444	721	494	1941	5801	2322	649	50	180	402	3128
Alingsås	4208	993	1257	3924	6634	2828	1274	36	367	432	3995
Alvesta	2022	1384	241	1721	4298	1160	412	25	148	192	2627
Aneby	612	432	119	1271	1171	288	172	9	75	67	748
Arboga	1535	444	349	917	3602	1161	510	10	61	206	1936
Arjeplog	162	131	59	165	957	533	84	3	72	31	583
Arvidsjaur	405	260	152	265	2363	1184	130	6	42	45	1068
Arvika	2474	984	642	1800	6349	2226	811	14	124	386	4637
Askersund	1150	616	251	834	3091	930	264	18	119	163	1655
Avesta	1906	952	378	1333	6607	2096	607	39	241	292	3426
Bengtsfors	1062	628	233	931	2747	696	254	6	67	143	1786
Berg	574	1006	97	394	1820	691	285	0	102	64	1410
Bjurholm	337	201	185	244	647	98	40	0	24	15	426
Bjuv	1468	298	228	657	3765	789	171	76	191	178	2139
Boden	2671	670	557	1407	8707	3761	603	1	329	255	3597
Bollebygd	1131	323	137	764	1654	516	253	10	81	103	778
Bollnäs	2165	1559	552	1895	6392	2712	984	21	224	394	4582
Borgholm	1523	1240	191	1279	1806	595	282	9	100	100	1802
Borlänge	4225	1153	916	2585	12596	4273	1511	224	667	733	6957
Borås	12220	2223	2390	8297	21248	7430	2682	120	735	1323	12773
Botkyrka	7858	507	1671	3243	13249	3917	1409	167	590	617	10691
Boxholm	382	337	69	445	1514	482	132	4	31	111	667
Bromölla	963	239	205	547	3712	1133	236	52	93	211	1812
Bräcke	494	556	100	194	2296	825	212	5	78	53	1297
Burlöv	1967	197	297	549	4237	627	257	70	231	158	1793
Båstad	3329	957	472	1553	1636	382	322	50	189	188	2064
Dals-Ed	454	442	90	594	893	243	144	29	24	86	797
Danderyd	11413	338	1674	2598	2027	503	495	21	179	166	2603
Degerfors	596	308	159	512	3751	1215	231	11	64	119	1385
Dorotea	150	156	141	155	1082	360	59	0	54	47	509
Eda	693	464	119	497	2107	666	160	8	22	89	1349
Ekerö	4910	449	762	1623	3025	906	689	66	185	266	2064
Eksjö	2014	1185	340	2314	3354	873	454	21	196	199	2242
Emmaboda	904	728	131	703	2731	636	215	4	91	166	1331
Enköping	5420	2064	691	2501	7758	1720	908	55	203	564	4942
Eskilstuna	9570	1768	2170	5076	22725	5849	2438	142	903	1222	13203
Eslöv	3459	1366	494	1443	7042	1280	511	136	370	360	4223
Essunga	830	559	110	536	1041	279	148	7	61	70	767
Fagersta	1201	208	238	601	3706	1462	243	10	71	126	1991
Falkenberg	4591	3244	839	2721	7793	1916	942	84	1440	579	4888
Falköping	3700	1850	622	3550	6260	1995	847	73	261	393	4369
Falun	7210	1738	1500	4092	10787	4023	1894	101	1145	774	7772
Filipstad	903	259	250	466	3695	1488	213	6	73	161	2048
Finspång	2061	604	402	1583	6394	2011	551	21	203	271	2623
Flen	1746	671	269	1112	4293	1197	482	27	127	237	2320
Forshaga	1107	379	220	638	3448	942	268	8	76	133	1519
Färgelanda	594	734	165	558	1562	407	122	17	68	100	1022
Gagnef	879	628	168	871	2172	746	443	16	155	142	1396
Gislaved	3437	1637	553	2782	6334	1243	629	30	288	412	3808
Gnesta	1174	604	194	735	1921	561	383	12	50	138	1325
Gnosjö	1078	354	160	1736	1633	315	159	21	102	97	1194
Gotland	6572	5119	1168	2973	11885	3692	1956	122	714	916	8883
Grums	738	380	121	546	2955	848	162	14	43	98	1602
Grästorp	887	468	138	611	1040	309	107	1	51	84	789
Gullspång	616	325	72	506	1380	546	209	12	53	74	811
Gällivare	1320	214	233	577	5408	4196	406	15	138	121	3760
Gävle	9620	1719	2618	5379	23255	7942	2817	145	640	1216	13613
Göteborg	67998	4375	17404	31704	77241	39280	15040	1403	8736	5468	71753
Götene	1372	747	313	1429	2922	974	330	18	101	161	1575
Habo	1199	333	150	1504	1788	441	211	3	112	151	973
Hagfors	886	615	156	638	4861	1946	255	8	46	153	2015
Hallsberg	1322	645	331	1032	4571	1371	392	31	167	210	2068
Hallstahammar	1220	322	292	728	4349	1416	319	17	82	189	2304
Halmstad	12059	2326	2250	5446	18117	4884	2131	197	3083	1413	11908
Hammarö	1847	174	329	866	3777	1185	354	13	98	171	1532
Haninge	9111	700	1540	3498	13566	4122	1632	668	712	893	9243
Haparanda	687	402	74	268	1959	732	82	3	123	48	2019
Heby	1262	1166	211	982	3001	990	321	28	67	244	1784
Hedemora	1482	850	245	1000	3852	1544	509	20	135	202	2452
Helsingborg	19343	1175	3090	6683	23355	6176	2184	714	4302	1666	19125
Herrljunga	955	792	305	1152	1680	551	266	7	120	118	1153
Hjo	1156	357	301	1037	1812	633	235	11	67	100	1113
Hofors	636	248	153	404	3366	1381	229	19	44	127	1719
Huddinge	13153	707	2340	4298	14566	4715	1790	368	892	928	10242
Hudiksvall	2652	2439	590	2214	8559	3936	1560	29	418	462	6277
Hultsfred	1310	1164	171	1284	3939	1214	209	9	120	210	2219
Hylte	984	842	194	772	2418	467	203	8	234	151	1496
Håbo	3242	304	347	1104	3217	714	370	16	189	216	2225
Hällefors	537	170	164	282	2744	886	198	5	36	82	1285
Härjedalen	913	578	198	475	3333	1210	281	11	130	101	2112
Härnösand	2918	1159	648	1800	6629	2204	914	17	231	300	3857
Härryda	4307	545	1057	2391	5387	1923	821	56	581	406	3132
Hässleholm	6333	2420	982	4402	9997	2782	1216	139	754	707	7705
Höganäs	4775	424	815	1972	4364	910	476	57	502	280	2873
Högsby	552	431	76	590	1600	561	117	4	27	76	960
Hörby	1871	1054	293	1205	2408	448	343	74	256	218	2226
Höör	2013	536	258	898	2466	541	405	172	474	170	2068
Jokkmokk	357	88	123	226	1808	1089	180	0	35	65	927
Järfälla	10520	584	2117	4073	11716	3300	1567	205	584	764	6871
Jönköping	13686	2657	2628	16157	24948	6863	2649	157	1625	1444	14041
Kalix	1180	664	316	570	6059	2069	486	26	89	146	2477
Kalmar	8252	1937	1360	4502	13811	4015	1753	65	660	977	7821
Karlsborg	801	320	185	775	1886	483	166	3	73	122	950
Karlshamn	3263	870	618	1906	8664	2983	907	44	209	512	4368
Karlskoga	3421	438	666	1828	9326	2928	581	56	522	406	4735
Karlskrona	8032	1966	1621	4662	15232	4565	1453	56	542	963	7552
Karlstad	11671	2079	2345	6031	18296	6389	2451	97	847	1088	10638
Katrineholm	3276	1105	808	1911	9471	1958	1082	44	347	403	4024
Kil	1401	545	297	931	2637	862	320	16	79	153	1601
Kinda	1000	823	169	1139	2163	587	254	12	92	145	1330
Kiruna	1555	181	327	744	7161	3964	407	20	207	195	4059
Klippan	2406	530	293	1213	3080	735	256	102	195	273	2943
Kramfors	1510	1502	307	1169	6909	2216	492	11	208	285	3187
Kristianstad	11046	1927	2074	4948	16774	3836	1729	79	1135	1282	11361
Kristinehamn	2610	791	698	1580	6695	2424	614	56	209	329	3571
Krokom	1076	1358	174	673	3397	1180	573	0	112	140	2018
Kumla	1827	680	480	1389	5009	1492	384	29	199	266	2437
Kungsbacka	13198	2060	2258	6061	9302	2663	1518	100	1398	827	6671
Kungsör	928	352	190	521	1943	667	216	8	67	114	1106
Kungälv	4938	1219	1039	3505	7762	2523	1004	88	372	485	4074
Kävlinge	4038	578	571	1206	6137	960	372	311	391	368	2855
Köping	2327	820	464	1398	6431	2356	514	28	237	309	3892
Laholm	3173	1801	399	1850	3892	961	561	105	802	414	3257
Landskrona	5304	442	804	1401	9297	1732	609	163	1431	446	5540
Laxå	461	198	139	503	1884	608	140	22	102	107	999
Lekeberg	710	598	158	680	1394	458	186	30	50	95	923
Leksand	1853	854	273	1736	2950	1123	583	25	187	189	2095
Lerum	5287	609	1240	3661	5948	2596	1167	56	407	452	3486
Lessebo	732	340	115	508	2446	822	197	5	51	120	1058
Lidingö	13070	520	2400	3327	3965	1197	907	78	301	328	4080
Lidköping	3952	1570	928	3258	8722	3004	864	43	434	467	4835
Lilla Edet	961	567	220	821	2950	1218	323	67	134	109	1811
Lindesberg	2250	1239	451	1650	5909	1967	650	42	224	280	3601
Linköping	20977	3392	4535	11702	26732	8217	4146	156	1975	2201	16231
Ljungby	2955	1870	403	2940	5816	1580	657	23	244	391	3888
Ljusdal	1514	1122	454	1087	4676	2241	513	33	143	211	3998
Ljusnarsberg	366	220	72	268	1635	677	141	21	29	66	1080
Lomma	4456	286	620	1354	3571	410	359	87	356	246	1589
Ludvika	2181	448	446	1408	7765	3450	603	49	270	485	4173
Luleå	6924	1815	1919	3165	19631	8470	1939	24	498	613	9159
Lund	19075	1945	5801	5433	17875	5875	3763	187	1236	1523	11125
Lycksele	787	305	615	1086	3698	1380	256	13	121	118	1936
Lysekil	1478	324	597	874	4263	1142	464	3	121	227	2086
Malmö	38930	1498	4988	10752	58979	12071	4989	1209	7219	3150	42251
Malung	1432	511	286	672	2744	1044	184	11	59	181	1531
Malå	265	99	113	193	1119	576	68	0	54	14	469
Mariestad	2553	718	510	2199	5695	1941	576	35	187	339	3609
Mark	3325	1820	482	2953	7677	2524	852	38	196	477	4218
Markaryd	982	498	109	1123	2355	598	208	5	105	136	1495
Mellerud	1065	805	193	956	1842	576	321	15	202	145	1561
Mjölby	2939	1036	485	2084	6416	1861	586	27	239	416	3445
Mora	2200	800	486	1684	4214	1597	719	19	331	308	3526
Motala	4176	1115	840	3016	11152	3292	1162	44	409	705	5774
Mullsjö	773	198	96	1189	1316	464	211	16	91	100	774
Munkedal	962	722	183	963	2266	771	267	24	131	136	1654
Munkfors	228	160	81	171	1599	460	65	10	24	34	651
Mölndal	7669	773	2178	4405	10327	3876	1380	374	1826	728	6804
Mönsterås	1211	897	157	995	3449	1006	271	10	110	170	1837
Mörbylånga	1784	958	255	1293	2696	784	397	11	125	189	1681
Nacka	16718	835	3033	4239	10592	3768	1877	89	634	767	8173
Nora	1028	363	285	723	2667	894	265	26	81	140	1476
Norberg	513	183	103	224	1594	946	149	12	32	93	813
Nordanstig	557	900	202	676	2244	1038	367	37	184	132	1908
Nordmaling	575	510	278	566	2070	567	130	0	80	56	1135
Norrköping	17017	2302	2182	7994	26487	8228	3664	241	2981	1577	18020
Norrtälje	7583	2335	1124	3391	10361	2892	1336	56	750	690	7689
Norsjö	261	353	129	390	1252	557	69	2	57	27	657
Nybro	2032	1238	225	1528	5366	1377	363	10	121	292	2948
Nykvarn	1142	183	238	365	1851	345	176	38	32	103	867
Nyköping	5767	1685	1213	3764	13224	3246	1269	77	382	646	6106
Nynäshamn	3344	438	525	1494	5156	1763	652	39	237	324	3201
Nässjö	3066	1276	545	3779	7200	1997	637	24	274	385	3524
Ockelbo	418	439	61	330	1577	818	135	6	21	81	1019
Olofström	1063	465	256	854	3988	1126	355	28	69	202	2257
Orsa	629	309	122	644	1423	739	258	6	95	86	1163
Orust	1912	685	476	1463	2832	1144	375	15	188	175	2120
Osby	1330	609	261	962	3339	837	320	33	98	215	1928
Oskarshamn	2822	775	492	2508	6998	2220	508	13	220	410	3699
Ovanåker	863	1190	272	1267	3013	901	398	5	82	127	1841
Oxelösund	832	142	203	531	3801	1021	256	25	80	111	1413
Pajala	455	211	75	368	2042	1450	100	1	114	55	1176
Partille	4623	304	1246	2899	5801	2364	829	76	719	377	3789
Perstorp	880	203	145	452	1427	448	94	16	194	86	1179
Piteå	2161	1385	723	1845	14165	5176	695	8	436	369	4291
Ragunda	400	577	62	169	1840	700	187	10	96	61	973
Robertsfors	479	852	223	544	1638	526	167	1	29	67	930
Ronneby	3504	1190	651	1875	7569	2496	673	39	149	450	3978
Rättvik	1301	571	328	853	2177	720	336	20	264	141	2074
Sala	2442	1361	490	1659	4633	1434	689	36	109	401	3225
Salem	2270	164	470	878	2356	700	362	77	122	146	1365
Sandviken	3270	1135	732	1890	11486	4032	888	51	198	468	5580
Sigtuna	5633	575	779	2023	6074	1739	678	45	610	394	4968
Simrishamn	3337	879	407	1548	3534	1137	481	39	305	359	3415
Sjöbo	2565	940	292	1015	3192	630	280	41	483	302	2878
Skara	2357	825	469	1480	4227	1181	498	10	135	234	2585
Skellefteå	4228	2898	2218	4759	22653	7182	1848	92	589	580	9662
Skinnskatteberg	333	195	60	235	1388	510	123	4	28	31	677
Skurup	1965	739	238	743	2778	509	259	43	279	237	2297
Skövde	6438	1843	1263	4424	10764	3079	1160	73	412	690	6770
Smedjebacken	1003	354	161	509	3547	1420	296	19	92	215	1662
Sollefteå	1546	973	284	1131	7311	2405	545	15	356	218	3297
Sollentuna	12160	742	2528	4213	8732	2468	1455	171	597	570	5886
Solna	11108	623	2309	3429	9961	3756	1488	101	713	716	8329
Sorsele	209	119	75	239	804	284	119	3	78	27	617
Sotenäs	1424	228	352	885	2245	504	235	12	96	145	1418
Staffanstorp	3826	434	473	1144	4598	625	305	61	443	244	1912
Stenungsund	2712	512	690	1768	3943	1340	501	50	234	279	2622
Stockholm	147599	7493	33027	39100	119270	56663	24362	1599	9182	8668	105082
Storfors	454	164	85	243	1432	499	91	8	19	62	605
Storuman	549	280	220	616	1604	662	153	10	166	52	1314
Strängnäs	4674	715	948	2056	6004	1559	716	29	201	452	3967
Strömstad	1134	569	269	684	2150	559	304	6	82	137	2023
Strömsund	774	1111	212	536	4456	1626	316	6	120	120	2192
Sundbyberg	5529	323	1179	1563	6559	2479	940	95	477	474	5152
Sundsvall	9776	2604	2740	5710	24649	8885	2672	89	1315	1321	13619
Sunne	1728	1341	327	950	2661	798	347	68	52	149	2103
Surahammar	701	158	206	446	3075	1080	212	13	58	146	1495
Svalöv	1670	932	228	704	2848	471	214	35	225	174	1851
Svedala	2659	402	306	1032	4999	686	319	61	289	262	2047
Svenljunga	1302	773	229	1044	2186	556	238	9	61	173	1527
Säffle	1835	1209	337	1424	3944	1161	340	17	71	232	2691
Säter	1161	796	187	864	2335	985	286	23	157	174	1524
Sävsjö	1178	849	176	1972	2007	496	223	7	113	74	1505
Söderhamn	2005	1126	375	1373	7806	3219	744	18	480	339	4604
Söderköping	2198	793	223	1152	2644	746	414	19	173	169	1732
Södertälje	8875	1343	1535	4045	16340	4057	2123	253	857	883	11925
Sölvesborg	2178	432	255	1033	4309	1112	284	126	84	292	2531
Tanum	1491	1013	399	1058	1803	663	419	18	102	210	2027
Tibro	1094	442	308	1170	2478	804	241	8	57	115	1379
Tidaholm	1064	479	362	1154	3538	931	238	10	129	157	1671
Tierp	1498	1310	369	1123	5857	1267	473	120	79	300	2855
Timrå	1010	708	319	865	5527	2134	388	109	140	144	2672
Tingsryd	1683	1193	132	1215	2720	794	342	18	91	139	2257
Tjörn	2048	249	669	2297	2248	670	332	46	252	185	1832
Tomelilla	1788	776	212	850	2381	543	255	45	165	237	2341
Torsby	1706	741	184	587	3706	1514	289	25	46	143	2159
Torsås	854	779	113	692	1553	349	208	5	50	91	1126
Tranemo	1396	1024	256	1005	2805	519	330	6	44	199	1389
Tranås	2187	550	317	2356	4180	1101	394	29	97	215	2382
Trelleborg	4920	803	535	2133	10188	1551	654	98	1353	499	5482
Trollhättan	5159	1095	1232	3420	13702	4146	1369	459	459	619	6746
Trosa	1579	244	274	856	2075	528	318	22	81	95	1177
Tyresö	7192	391	1233	2185	6939	2057	1026	102	335	479	4031
Täby	18663	626	3278	4797	6811	1602	1130	51	518	520	5432
Töreboda	966	723	147	826	1995	674	251	15	88	154	1574
Uddevalla	5070	1271	1206	3905	11870	3966	1322	285	846	643	6492
Ulricehamn	2770	1618	510	2712	4221	1174	724	6	194	334	2796
Umeå	9057	3035	3568	6274	24655	10308	4276	16	841	1001	13176
Upplands-Väsby	5901	439	1028	1939	6849	2062	913	84	553	471	5017
Upplands-Bro	2995	243	498	1385	4018	1231	440	36	187	222	2540
Uppsala	27493	4815	8614	11985	33196	12673	7204	625	2471	2675	24092
Uppvidinge	853	798	150	761	2323	849	214	19	50	121	1371
Vadstena	1057	312	183	759	1796	475	251	12	91	112	952
Vaggeryd	1220	561	220	2027	2705	677	203	15	136	88	1308
Valdemarsvik	976	745	90	615	2096	489	196	13	86	96	1198
Vallentuna	4846	597	751	1827	3659	1054	678	17	276	285	2744
Vansbro	620	479	112	574	1757	622	167	11	119	125	1276
Vara	2468	1380	306	1601	2715	772	326	29	209	207	2444
Varberg	6505	3475	1148	4188	10663	3151	1124	62	1446	944	6692
Vaxholm	2083	167	335	658	1271	413	281	3	68	90	890
Vellinge	9760	482	747	2100	4796	472	351	54	741	293	2673
Vetlanda	2722	1845	521	3857	5462	1621	660	47	201	265	3383
Vilhelmina	380	276	233	554	2287	849	143	2	163	55	1292
Vimmerby	1586	1492	168	1346	3488	971	296	6	173	293	2277
Vindeln	519	488	259	568	1358	374	151	1	78	31	997
Vingåker	881	396	186	616	2633	609	492	5	57	122	1149
Vårgårda	952	714	282	1577	1727	653	341	15	82	101	1346
Vänersborg	3730	1493	895	3259	8280	3032	1038	82	389	487	4908
Vännäs	500	657	184	531	2125	789	188	2	65	60	1267
Värmdö	5949	413	753	1607	5004	1756	738	28	235	368	3207
Värnamo	3648	1488	584	4518	6675	1154	643	47	407	390	3787
Västervik	3821	1770	777	2688	9838	3014	1050	17	272	478	5976
Västerås	17440	1834	4188	8549	28119	8030	3251	237	958	1823	18378
Växjö	10568	3330	1802	6195	15969	5078	2147	83	692	752	9089
Ydre	402	381	79	690	759	197	126	3	44	38	432
Ystad	4382	828	683	1366	6004	1149	493	105	636	481	4262
Åmål	1246	588	257	1034	3236	951	344	18	114	166	2093
Ånge	752	609	144	606	3272	1287	307	11	124	174	1904
Åre	898	933	209	562	1978	809	408	1	76	122	1324
Årjäng	865	530	637	851	1512	486	170	3	37	127	1997
Åsele	222	258	89	206	1233	288	63	1	82	31	571
Åstorp	1646	270	214	739	3133	690	170	43	148	162	2082
Åtvidaberg	1167	575	185	947	3448	874	296	12	135	219	1446
Älmhult	2064	1044	248	1263	3812	796	337	12	109	172	2098
Älvdalen	609	465	123	548	1770	736	240	13	107	150	1542
Älvkarleby	568	118	181	307	3104	917	179	49	37	113	1247
Älvsbyn	407	327	113	422	2876	1604	105	0	49	66	1079
Ängelholm	7286	1316	1007	3348	6026	1495	762	153	581	566	5656
Öckerö	1612	95	397	2109	1887	656	322	25	118	134	1310
Ödeshög	615	427	94	695	1194	308	171	8	49	65	717
Örebro	14140	2830	4781	9031	27986	9234	3755	445	1446	1567	16017
Örkelljunga	1379	389	238	1169	1449	357	148	78	98	135	1604
Örnsköldsvik	4104	2936	1236	4791	16960	4173	1097	25	408	616	7876
Östersund	6027	3688	1193	3185	14316	5277	2330	21	515	693	8635
Österåker	6969	450	1059	2484	5426	1556	834	33	322	438	3774
Östhammar	2325	1244	414	1115	5371	1329	524	33	286	374	3244
Östra Göinge	1355	473	228	920	3927	983	309	19	120	232	2223
Överkalix	202	258	62	107	1475	582	69	1	19	31	674
Övertorneå	428	391	47	278	1331	737	91	2	52	21	820

## Sheet: 2002
	M	C	FP	KD	S	V	MP	SD	Other	Invalid	Nonvoters
Ale	1620	796	1771	1499	6428	1508	606	305	125	234	3523
Alingsås	2839	1186	3323	3434	7450	1992	1213	106	127	372	4501
Alvesta	1478	1544	1002	1270	4568	814	373	249	76	166	2710
Aneby	374	471	300	1152	1402	174	120	23	58	46	797
Arboga	953	564	1006	683	3622	723	429	80	109	170	2109
Arjeplog	77	184	108	112	907	294	90	0	209	15	595
Arvidsjaur	224	331	239	191	2385	642	83	2	328	36	1172
Arvika	1555	1356	1619	1193	6636	1424	838	257	208	308	4752
Askersund	800	760	630	673	3269	615	231	152	56	109	1709
Avesta	1270	1253	1165	922	6633	1292	467	104	148	251	3935
Bengtsfors	551	872	559	653	2863	430	186	14	69	105	1840
Berg	405	1046	255	321	1845	474	253	14	116	58	1415
Bjurholm	228	323	170	164	629	65	14	4	16	13	443
Bjuv	939	266	625	529	3865	425	157	361	87	155	2548
Boden	1777	701	1215	936	8439	2072	893	39	1778	167	3912
Bollebygd	796	371	522	667	1783	336	214	70	26	84	901
Bollnäs	1577	2961	1868	1232	6085	1495	784	138	219	282	4248
Borgholm	1127	1501	614	1022	2020	403	281	33	57	83	1791
Borlänge	2831	1704	2593	1686	13265	2724	1417	501	592	547	7787
Borås	8815	2510	6753	6786	24512	4747	2221	876	905	1029	14044
Botkyrka	4795	556	4967	3327	14987	3573	1645	416	482	431	12322
Boxholm	244	377	194	323	1761	249	107	19	26	66	690
Bromölla	659	270	545	498	3993	619	207	239	50	119	2036
Bräcke	356	639	236	111	2237	490	140	5	69	39	1441
Burlöv	1237	204	1031	451	4184	551	238	562	224	106	2227
Båstad	2386	996	1354	1314	1879	271	318	224	57	178	2273
Dals-Ed	291	484	174	464	1023	115	99	8	42	46	938
Danderyd	8644	359	4733	2047	2145	396	612	92	143	103	2738
Degerfors	332	343	391	340	3947	866	164	60	48	73	1409
Dorotea	73	245	178	90	1068	213	34	6	33	30	576
Eda	382	576	355	352	2154	304	114	40	45	67	1474
Ekerö	3562	516	2779	1434	3522	712	866	107	137	167	2201
Eksjö	1383	1193	944	2038	3897	512	378	82	89	148	2319
Emmaboda	585	793	328	593	3008	345	200	45	75	104	1361
Enköping	3550	2479	2345	2088	8686	1167	766	169	466	423	5816
Eskilstuna	6164	2218	6370	3814	24090	3920	2501	677	650	876	14916
Eslöv	2272	1520	1750	952	7363	844	510	734	213	330	4751
Essunga	627	661	306	434	1165	200	94	12	31	70	794
Fagersta	747	286	581	441	3838	997	261	75	75	94	2108
Falkenberg	3357	3515	2637	2117	8601	1284	892	289	705	405	5505
Falköping	2673	2257	1595	2773	7000	1297	743	281	112	318	4562
Falun	4974	2744	4077	2450	12519	2806	1811	346	866	534	8677
Filipstad	543	369	487	387	3570	815	218	95	148	150	2144
Finspång	1284	762	1097	1274	6844	1258	535	125	74	243	2764
Flen	1180	731	902	842	4679	733	441	97	119	119	2409
Forshaga	626	511	589	490	3513	550	263	146	87	109	1630
Färgelanda	374	796	440	409	1621	248	80	67	37	65	1101
Gagnef	573	874	519	615	2346	423	261	47	144	115	1538
Gislaved	2363	1771	1500	2475	6952	795	455	254	216	259	4315
Gnesta	834	598	658	493	2327	381	374	36	68	77	1436
Gnosjö	717	370	420	1708	1918	200	108	85	51	65	1357
Gotland	4808	5367	2701	2242	14024	2911	1898	209	176	742	9286
Grums	482	529	318	413	3006	483	116	50	100	97	1580
Grästorp	649	603	334	438	1181	186	104	43	14	55	873
Gullspång	402	370	236	377	1483	279	135	94	81	51	887
Gällivare	805	214	457	395	4814	1907	560	87	2245	77	3744
Gävle	6393	2372	7013	4050	25303	5425	2694	795	351	956	14880
Göteborg	47586	5115	49187	23519	90547	32405	17657	4311	2729	4433	80390
Götene	917	864	723	1114	3218	635	308	82	76	129	1707
Habo	843	347	534	1343	2039	289	165	20	90	131	1080
Hagfors	544	810	427	419	4903	1180	176	101	55	121	2243
Hallsberg	814	809	831	839	4895	804	328	226	89	137	2101
Hallstahammar	696	361	817	696	4361	886	277	162	89	108	2513
Halmstad	8562	3038	7266	4444	21403	3591	2200	346	1492	1028	13172
Hammarö	1229	346	1156	662	4028	713	314	111	112	129	1691
Haninge	6123	768	5588	3074	15950	3402	1919	327	859	572	10566
Haparanda	469	439	161	224	1829	401	170	9	377	42	2014
Heby	749	1326	659	825	3174	655	274	107	64	187	2170
Hedemora	945	1149	678	706	3823	928	459	54	174	142	2891
Helsingborg	12846	1452	10323	5770	26664	4036	2441	2767	2082	1263	21363
Herrljunga	697	923	567	991	1892	382	201	70	58	114	1233
Hjo	817	456	617	820	2055	374	203	51	51	91	1295
Hofors	387	306	461	257	3380	922	197	72	10	79	1858
Huddinge	8924	863	7785	3718	17036	3772	2159	764	686	603	11753
Hudiksvall	1723	3211	1661	1512	9108	2514	1202	134	299	388	7093
Hultsfred	812	1251	484	1092	4113	726	207	164	44	135	2311
Hylte	691	1035	536	521	2528	275	174	64	159	125	1552
Hällefors	309	277	277	193	2805	437	133	33	14	79	1461
Härjedalen	650	771	404	310	3341	809	245	20	100	88	2260
Härnösand	1533	1619	1552	1133	6997	1472	874	67	102	212	4277
Härryda	3050	694	3345	1699	6054	1368	909	272	306	313	3690
Hässleholm	4293	2506	2975	3693	10911	1578	1148	981	260	455	8240
Håbo	2287	396	1365	1068	3585	493	374	98	136	198	2357
Höganäs	3259	567	2309	1646	4675	673	509	385	254	244	3103
Högsby	370	495	203	550	1778	316	90	32	20	35	876
Hörby	1140	1115	901	785	2626	281	273	435	249	157	2533
Höör	1349	609	1045	722	2817	391	377	352	290	137	2341
Jokkmokk	145	115	193	132	1606	479	308	1	565	42	965
Järfälla	6750	741	6639	3387	13521	2830	1691	457	333	407	7514
Jönköping	9658	3012	7776	14491	28982	4731	2648	735	943	1084	15583
Kalix	710	687	549	444	5941	1127	978	20	670	90	2418
Kalmar	5767	2298	4279	3702	16110	2663	1772	265	673	679	8212
Karlsborg	602	452	424	550	1932	275	140	24	41	98	1003
Karlshamn	2235	1052	2000	1442	9176	1994	881	532	34	383	4531
Karlskoga	2125	528	1805	1239	10228	1665	551	222	375	271	4864
Karlskrona	5426	2393	4876	3884	17172	2820	1557	1040	109	549	7300
Karlstad	7794	2930	7300	4456	20485	4093	2500	710	1004	893	11401
Katrineholm	2131	1167	1923	1523	10293	1093	981	242	190	271	4580
Kil	954	702	799	685	2928	495	266	109	63	126	1731
Kinda	680	997	494	879	2352	352	258	62	31	99	1456
Kiruna	613	263	575	529	5613	2034	721	75	3286	115	3999
Klippan	1609	622	791	1001	3444	386	227	228	188	235	3112
Knivsta	1436	485	1281	755	2279	391	361	117	57	113	1497
Kramfors	880	1814	698	757	6644	1637	477	47	63	194	3425
Kristianstad	7423	2188	6238	4031	18489	2627	1680	1013	712	877	12072
Kristinehamn	1787	1285	1824	1240	6265	1419	638	210	220	345	3515
Krokom	743	1685	439	421	3414	781	522	24	131	121	2245
Kumla	1179	838	1081	1207	5615	910	362	255	126	143	2499
Kungsbacka	9905	2405	7992	4876	10594	1908	1521	474	764	553	7610
Kungsör	586	428	562	409	2184	398	173	26	54	102	1215
Kungälv	3518	1411	3467	2835	8972	1760	936	275	163	338	4463
Kävlinge	2761	650	2106	970	6549	628	402	914	244	219	3096
Köping	1546	979	1442	959	6853	1395	457	127	288	257	4199
Laholm	2230	2194	1373	1536	4423	642	478	165	363	289	3620
Landskrona	3512	460	2902	1224	9485	1348	542	1322	587	305	6454
Laxå	268	286	351	396	2001	384	94	96	68	71	961
Lekeberg	487	786	388	513	1589	283	161	104	36	60	979
Leksand	1181	1325	965	1233	3291	723	454	76	180	164	2327
Lerum	3655	724	3841	2567	6976	1803	1060	361	197	318	3867
Lessebo	506	409	375	325	2674	471	182	60	22	90	1082
Lidingö	9563	482	6959	2443	4475	919	1076	223	139	224	4339
Lidköping	2745	1826	2298	2591	9921	2159	844	155	315	321	5186
Lilla Edet	731	609	690	573	3256	697	337	191	57	121	2084
Lindesberg	1417	1682	1171	1063	6650	1079	565	223	139	194	3702
Linköping	13410	4255	12678	9011	32093	5891	4514	569	1622	1638	17616
Ljungby	1972	2319	1375	2080	6388	1050	634	199	143	292	4125
Ljusdal	909	1612	994	815	4628	1432	491	96	92	178	4395
Ljusnarsberg	228	341	190	196	1644	389	108	54	22	35	1105
Lomma	3173	298	2366	920	3800	309	369	401	247	152	1620
Ludvika	1387	708	1193	916	8363	2049	602	170	133	358	4619
Luleå	4417	2154	4391	2616	21034	5204	2791	79	2084	447	9727
Lund	10655	2082	12969	3594	21595	5768	4535	1101	778	963	12026
Lycksele	423	644	841	842	3890	758	162	30	104	78	2130
Lysekil	1042	339	1403	640	4465	690	406	107	41	178	2195
Malmö	24235	1701	20322	7793	62338	11172	6310	5538	7725	2250	46955
Malung	942	733	648	425	2771	618	171	36	140	128	1737
Malå	135	199	187	158	1073	381	45	2	19	20	580
Mariestad	1859	880	1438	1609	6183	1246	619	240	105	259	3786
Mark	2170	2054	1851	2360	8362	1588	798	205	171	428	4607
Markaryd	659	557	369	902	2473	278	146	166	45	101	1663
Mellerud	716	865	544	757	2020	358	174	109	113	121	1647
Mjölby	1943	1227	1516	1551	7125	1101	518	50	320	284	3696
Mora	1421	1417	1279	1004	4543	959	602	114	321	232	3739
Motala	2693	1276	2560	2247	12338	1896	1020	107	857	427	6407
Mullsjö	512	227	341	1090	1501	300	181	36	68	80	896
Munkedal	640	845	542	728	2421	421	195	130	78	97	1845
Munkfors	158	221	180	106	1527	248	76	47	13	34	636
Mölndal	5433	1015	6482	3319	11990	3039	1481	673	729	492	7355
Mönsterås	837	928	563	827	3862	642	235	71	114	116	1872
Mörbylånga	1290	1108	879	1013	3171	535	325	50	39	109	1749
Nacka	12142	735	9740	3504	11898	3035	2407	382	400	524	9013
Nora	691	490	713	560	2840	573	257	89	60	92	1671
Norberg	311	189	281	175	1730	601	145	15	42	55	956
Nordanstig	402	1144	453	489	2252	528	256	40	153	75	2004
Nordmaling	340	656	406	460	2190	338	105	9	31	42	1247
Norrköping	12043	2725	8371	6553	30469	5635	3682	1006	1570	1306	19674
Norrtälje	5427	2695	4099	2586	12309	1941	1430	167	633	518	8656
Norsjö	117	559	191	256	1257	390	48	4	28	20	731
Nybro	1305	1404	845	1329	5674	918	283	62	316	234	2979
Nykvarn	803	220	641	374	1961	237	192	85	57	87	952
Nyköping	4001	1841	3477	2884	14633	2278	1328	237	175	447	6569
Nynäshamn	2243	506	1869	1235	6078	1251	692	251	71	230	3619
Nässjö	2095	1352	1301	3224	7917	1339	606	166	219	274	3804
Ockelbo	240	554	237	212	1681	481	100	30	51	57	1145
Olofström	652	503	747	719	4127	690	220	255	33	119	2116
Orsa	414	547	366	330	1480	411	240	112	115	63	1268
Orust	1326	846	1327	1023	3229	732	420	118	47	128	2306
Osby	813	685	621	857	3443	541	242	225	63	154	2159
Oskarshamn	2026	848	1338	2209	7702	1316	490	156	75	258	3932
Ovanåker	569	1780	617	1056	2736	524	287	25	76	115	1850
Oxelösund	666	129	599	400	3815	793	322	31	36	95	1626
Pajala	220	186	98	347	1560	857	111	1	1012	20	1229
Partille	3171	371	3740	2186	6702	1754	869	278	314	292	4052
Perstorp	584	266	399	345	1589	285	80	64	93	77	1263
Piteå	1248	1618	1640	1693	14685	3136	1058	95	1282	214	4733
Ragunda	270	634	141	114	1742	422	112	6	85	54	1217
Robertsfors	248	1316	235	384	1684	346	93	7	23	47	1064
Ronneby	2287	1321	1910	1399	8188	1614	675	537	43	342	4133
Rättvik	829	950	736	525	2530	437	295	55	140	135	2052
Sala	1484	1612	1427	1212	5143	928	544	149	101	263	3563
Salem	1543	173	1442	740	2819	470	386	122	83	86	1526
Sandviken	2034	1463	1907	1466	11622	2640	835	251	236	365	6035
Sigtuna	3807	703	2924	1764	7235	1293	803	319	119	295	5660
Simrishamn	2290	1037	1375	1050	4116	770	453	290	161	219	3601
Sjöbo	1761	1028	866	889	3507	456	266	479	309	226	3132
Skara	1629	991	1139	1162	4643	863	441	89	58	152	2776
Skellefteå	2265	4591	4261	3807	22779	5150	1612	189	313	606	10412
Skinnskatteberg	210	225	185	143	1450	348	105	15	23	32	796
Skurup	1405	753	888	567	3175	385	210	452	126	141	2297
Skövde	4301	2217	3603	3435	12058	2091	1161	307	304	593	7237
Smedjebacken	632	443	463	339	3688	771	249	32	76	137	1953
Sollefteå	891	1293	748	975	7004	1511	532	87	85	230	3572
Sollentuna	8479	876	7442	3429	10103	2046	1608	346	221	377	6347
Solna	7766	640	6886	2442	11842	3302	1969	327	401	468	8887
Sorsele	100	274	115	210	791	168	85	9	42	25	606
Sotenäs	1125	273	880	629	2302	345	198	57	68	108	1569
Staffanstorp	2526	480	1791	859	5080	399	291	436	329	166	2179
Stenungsund	2016	646	2075	1419	4706	855	527	159	198	237	2992
Stockholm	96205	8109	89510	30228	143640	49795	31027	4706	4785	5248	110687
Storfors	255	201	211	200	1448	287	84	32	34	42	718
Storuman	332	550	323	460	1703	402	143	14	98	40	1266
Strängnäs	3220	955	2858	1659	6742	1042	787	86	185	272	4426
Strömstad	793	786	728	433	2188	387	302	32	37	95	2243
Strömsund	536	1267	387	353	4193	1102	253	23	142	96	2298
Sundbyberg	3847	395	3454	1278	7493	1956	1130	302	214	264	5554
Sundsvall	6263	3935	6939	3946	26627	5719	2412	791	742	815	15043
Sunne	1194	1660	767	727	2874	485	309	128	45	115	2200
Surahammar	404	214	487	312	3241	646	197	52	51	100	1628
Svalöv	1103	919	696	526	2969	297	206	355	169	104	1846
Svedala	1818	433	1473	755	4875	420	276	690	203	176	2176
Svenljunga	827	918	626	769	2310	292	200	54	49	133	1678
Säffle	1245	1921	1082	1094	3401	660	359	104	188	217	2447
Säter	753	1005	535	548	2531	633	261	55	124	139	1857
Sävsjö	862	905	401	1705	2175	298	146	91	88	84	1513
Söderhamn	1246	1784	1337	1141	7360	2451	605	123	280	345	4770
Söderköping	1620	886	874	977	3007	490	458	109	93	153	1879
Södertälje	5921	1377	5289	3962	17298	3072	2448	293	1254	544	12984
Sölvesborg	1867	508	937	875	4515	709	298	270	36	215	2531
Tanum	1013	1298	994	732	2042	410	349	40	102	170	2159
Tibro	754	515	680	904	2691	459	223	49	63	96	1596
Tidaholm	770	638	651	880	3794	649	246	59	29	119	1730
Tierp	981	1490	962	914	6061	878	442	175	44	198	3249
Timrå	581	891	856	631	5914	1343	251	161	126	102	2797
Tingsryd	1170	1395	490	937	2870	472	258	171	98	132	2230
Tjörn	1481	347	1613	2019	2639	498	341	174	71	149	1915
Tomelilla	1278	834	672	558	2593	366	221	344	64	190	2537
Torsby	1251	1012	471	434	3480	926	230	93	78	126	2465
Torsås	587	861	293	576	1748	200	156	27	26	56	1175
Tranemo	882	1112	641	849	3030	359	239	65	23	152	1501
Tranås	1431	613	938	1963	4831	683	381	47	148	125	2535
Trelleborg	3380	931	2211	1612	10859	931	638	1099	904	328	6251
Trollhättan	3532	1385	3466	2363	15365	2721	1215	647	97	496	7749
Trosa	1183	320	833	579	2547	344	331	35	46	81	1272
Tyresö	4860	445	4104	1749	7860	1612	1104	231	348	310	4560
Täby	13275	751	9557	3647	7368	1285	1369	352	244	327	5863
Töreboda	727	779	388	581	2089	392	197	121	48	116	1710
Uddevalla	3449	1551	3658	3130	12664	2668	1200	704	202	428	7673
Ulricehamn	1728	1825	1558	2115	4825	866	552	71	215	260	3052
Umeå	4994	5526	7571	4823	28182	8122	4166	200	666	949	14183
Upplands-Väsby	3822	489	3350	1699	7943	1703	916	224	308	298	5482
Upplands-Bro	2054	320	1760	1239	4487	899	436	87	102	164	2905
Uppsala	16236	5450	20110	9562	36370	10086	7439	1594	995	1714	24598
Uppvidinge	609	910	388	514	2491	511	157	140	18	80	1446
Vadstena	806	329	493	580	1963	257	230	31	137	83	1073
Vaggeryd	813	565	500	1882	3070	379	198	75	102	91	1560
Valdemarsvik	711	793	396	466	2225	297	174	19	42	84	1248
Vallentuna	3278	658	2820	1654	4373	807	844	173	118	216	3106
Vansbro	373	660	284	445	1742	370	128	56	74	124	1406
Vara	1856	1535	841	1191	3157	529	256	95	32	149	2622
Varberg	4519	3721	3611	3226	12746	2295	1313	421	830	621	7400
Vaxholm	1516	207	1328	556	1481	327	280	37	26	74	988
Vellinge	7787	472	3712	1589	4805	288	385	667	474	226	2884
Vetlanda	1836	1993	1321	3216	6242	954	486	126	156	217	3662
Vilhelmina	145	583	398	522	2211	470	153	27	80	56	1317
Vimmerby	1023	1704	593	1181	3839	564	301	75	34	172	2464
Vindeln	300	697	332	394	1382	258	80	10	45	33	1135
Vingåker	621	418	484	461	2966	278	281	37	52	58	1221
Vänersborg	2470	1659	2496	2270	9726	2133	956	204	209	500	5528
Vännäs	269	905	338	432	2181	559	156	20	11	51	1393
Värmdö	4385	458	3280	1577	5865	1274	1015	145	122	286	3879
Värnamo	2380	1691	1702	4029	7744	763	528	254	202	251	4390
Västervik	2602	2169	2446	2018	10064	1891	870	177	112	353	6160
Västerås	10802	2354	12408	6102	31557	5433	3642	882	1230	1237	20483
Växjö	7425	3548	5723	4668	18070	3827	2292	703	375	689	10055
Vårgårda	669	774	630	1473	1973	397	262	36	81	98	1402
Ydre	267	434	213	548	845	111	123	1	21	41	469
Ystad	3149	939	1857	1028	7030	741	468	467	283	337	4637
Älmhult	1381	1064	816	999	4162	441	312	120	48	140	2400
Älvdalen	337	581	379	362	1839	338	182	35	206	91	1732
Älvkarleby	359	168	434	257	3255	534	184	120	6	74	1388
Älvsbyn	223	424	222	349	3014	841	134	9	402	49	1188
Ängelholm	5425	1314	3072	2792	7186	913	849	526	482	548	6100
Åmål	715	842	699	750	3457	514	298	51	74	166	2213
Ånge	451	819	399	418	3247	777	214	68	91	99	2073
Åre	690	965	436	394	2106	488	377	8	176	85	1500
Årjäng	500	732	1378	548	1497	279	107	35	32	76	1801
Åsele	114	380	127	133	1156	202	42	9	45	30	560
Åstorp	1218	303	585	664	3241	360	149	260	75	134	2434
Åtvidaberg	810	717	566	749	3623	497	271	49	107	149	1516
Öckerö	1410	134	1006	2039	2076	462	276	50	29	115	1352
Ödeshög	416	476	202	626	1298	188	156	10	39	46	825
Örebro	9258	3539	10909	7827	32052	6872	3997	1345	972	1197	16552
Örkelljunga	922	379	521	1108	1659	193	130	154	115	107	1759
Örnsköldsvik	2243	4195	2782	3590	18053	2443	912	48	596	395	8112
Östersund	3942	4698	3271	1850	15378	3903	2065	119	395	536	9806
Österåker	4927	544	4050	2007	6511	1154	1008	156	179	271	4147
Östhammar	1633	1534	1097	1002	5799	823	496	150	82	230	3574
Östra Göinge	1007	560	628	753	3945	589	274	167	115	161	2278
Överkalix	93	244	84	91	1404	342	86	4	268	28	631
Övertorneå	186	345	77	180	1079	376	90	3	593	11	995

## Sheet: 2006
	M	C	FP	KD	S	V	MP	SD	Other	Invalid	Nonvoters
Ale	3272	1071	1116	1094	6164	1102	645	606	335	312	3518
Alingsås	5249	1869	2240	2417	7297	1474	1541	550	507	398	4190
Alvesta	2793	1508	586	864	4263	508	372	440	233	232	2454
Aneby	733	543	205	916	1310	132	118	136	67	78	771
Arboga	1733	725	542	423	3453	525	316	201	289	166	1967
Arjeplog	210	202	119	93	879	283	62	34	73	34	550
Arvidsjaur	465	334	172	95	2550	553	76	46	147	63	995
Arvika	2890	1746	864	850	6497	1061	761	614	325	308	4217
Askersund	1371	801	384	549	3238	399	259	273	97	133	1574
Avesta	2646	1154	672	607	6335	914	469	553	384	328	3392
Bengtsfors	1009	878	297	418	2608	338	247	128	173	105	1663
Berg	745	1104	99	189	1631	349	197	76	154	96	1375
Bjurholm	301	314	152	132	560	51	35	5	20	17	409
Bjuv	1578	336	370	326	3673	227	152	785	172	150	2338
Boden	3201	979	756	835	8723	1576	517	326	918	232	3711
Bollebygd	1399	484	342	441	1676	289	182	195	163	95	842
Bollnäs	2671	2664	752	893	6046	1051	589	476	559	337	4801
Borgholm	1892	1555	325	580	1938	276	287	250	127	111	1679
Borlänge	5318	2065	1608	1255	12894	2025	1240	1012	916	614	6919
Borås	15297	3495	4342	4735	21911	3665	2544	1946	2323	1066	13727
Botkyrka	10180	1226	2890	2537	14465	2710	2030	839	784	566	11984
Boxholm	452	373	97	268	1686	183	100	85	96	85	645
Bromölla	1180	347	406	335	3851	429	173	549	156	186	1749
Bräcke	632	629	128	95	2034	410	134	54	108	90	1249
Burlöv	2188	285	655	295	3742	377	277	709	325	121	2209
Båstad	3908	1191	720	782	1704	165	349	336	194	148	1990
Dals-Ed	543	471	129	331	931	84	77	53	128	54	767
Danderyd	11744	1242	2089	1848	1541	230	594	134	235	91	2562
Degerfors	615	341	201	329	3633	703	168	183	129	95	1373
Dorotea	162	231	160	60	1012	167	19	19	24	47	570
Eda	681	669	149	256	1917	205	87	138	126	85	1412
Ekerö	6625	1040	1529	1093	2535	483	980	212	331	213	1943
Eksjö	2476	1266	582	1440	3390	379	384	294	167	195	2286
Emmaboda	1032	812	163	451	2647	238	205	185	118	147	1312
Enköping	6688	2874	1202	1363	7866	874	1007	517	629	551	5472
Eskilstuna	11576	3192	3706	3104	23614	2882	2869	1523	1129	1110	14013
Eslöv	3933	1649	1249	682	7117	624	555	1490	430	333	4331
Essunga	977	651	165	269	1065	154	108	103	78	78	767
Fagersta	1291	322	372	334	3611	683	220	165	239	138	2042
Falkenberg	6018	3632	1649	1396	8590	920	961	733	586	609	5472
Falköping	4389	2464	871	1887	7066	938	709	816	421	353	4163
Falun	8775	3615	2157	2037	11633	2027	2106	845	1247	684	7591
Filipstad	917	384	273	228	3702	586	150	204	107	118	1944
Finspång	2397	937	622	931	6265	881	544	355	369	238	2635
Flen	2004	859	490	559	4604	533	424	268	170	179	2225
Forshaga	1149	538	351	376	3598	398	217	255	151	131	1443
Färgelanda	714	764	259	230	1556	153	87	171	147	100	1027
Gagnef	1107	990	249	443	2350	347	249	166	180	108	1408
Gislaved	4251	1787	920	1694	6243	529	451	781	333	302	4128
Gnesta	1566	678	332	334	2064	291	438	147	140	130	1291
Gnosjö	1195	420	224	1395	1764	140	126	204	99	84	1275
Gotland	7715	6883	1554	1374	12464	2145	2237	566	812	1030	8425
Grums	913	529	184	302	2907	356	131	150	119	98	1542
Grästorp	1075	598	165	233	1190	130	88	83	87	66	763
Gullspång	612	384	160	242	1482	181	104	126	149	58	745
Gällivare	1361	298	269	323	6034	2037	329	268	501	120	3464
Gävle	12600	3524	4036	2773	23058	4230	3055	1888	1602	1055	13722
Göteborg	78679	13076	29981	19698	84693	25407	24694	7455	9043	4615	76495
Götene	1684	876	441	867	3090	379	312	205	159	173	1587
Habo	1550	436	349	1214	1982	213	201	210	96	150	899
Hagfors	976	688	256	258	4644	922	148	306	123	123	2122
Hallsberg	1407	837	473	630	4695	569	336	436	185	201	1860
Hallstahammar	1375	458	507	620	4213	648	316	243	208	198	2290
Halmstad	15383	3755	4327	3398	20045	2445	2410	1439	2307	1140	12177
Hammarö	2265	510	637	597	3804	520	362	210	173	144	1511
Haninge	13128	1574	3171	2356	13395	2375	2199	913	1136	762	9924
Haparanda	714	509	94	152	2134	261	88	57	145	53	1925
Heby	1520	1360	404	573	2946	474	251	305	190	211	2108
Hedemora	1794	1115	374	482	3744	683	427	284	274	175	2593
Helsingborg	23235	2814	6389	3699	24494	2547	3038	4668	2881	1239	19191
Herrljunga	1246	904	402	622	1814	288	188	211	174	128	1119
Hjo	1442	514	333	565	1995	246	247	168	111	110	1165
Hofors	821	352	325	171	3065	685	190	239	157	127	1667
Huddinge	17041	2056	4423	2992	14118	2781	2630	1297	1123	751	11478
Hudiksvall	3883	3513	809	1098	8629	1875	1176	500	670	527	6288
Hultsfred	1394	1218	325	700	3794	496	247	318	170	185	2246
Hylte	1292	938	306	407	2294	196	169	245	118	116	1508
Hällefors	570	345	122	134	2610	390	124	161	84	58	1205
Härjedalen	1137	852	312	251	3023	542	153	179	164	133	1952
Härnösand	3033	1824	800	777	6267	1115	913	343	833	205	3572
Härryda	5711	1339	2056	1421	5620	1050	1055	523	497	348	3259
Hässleholm	7445	2783	1785	2538	10302	997	1094	1895	629	562	7776
Håbo	4254	639	735	677	3091	385	424	252	289	186	2156
Höganäs	5637	874	1273	1180	4117	357	604	632	440	221	2980
Högsby	579	539	153	259	1634	187	77	190	40	62	888
Hörby	2274	1052	599	537	2451	208	265	681	437	173	2334
Höör	2442	742	624	491	2658	332	446	664	258	144	2141
Jokkmokk	371	190	200	79	1636	505	223	35	186	55	908
Järfälla	12676	1518	3513	2522	11188	2091	2031	836	781	593	7351
Jönköping	17624	4472	4618	13076	26602	3835	3149	2020	1645	1376	14756
Kalix	1123	766	365	363	6547	766	509	189	296	155	2429
Kalmar	9785	2982	2596	2575	15584	1878	2053	1176	799	738	7635
Karlsborg	996	607	275	334	1773	172	127	118	102	137	889
Karlshamn	3912	1288	1179	898	8827	1332	834	1252	287	456	4351
Karlskoga	3747	793	898	1010	9341	1206	604	567	751	360	4390
Karlskrona	9330	2810	2956	2297	15782	1761	1623	2325	613	740	7317
Karlstad	13504	4020	4104	3504	19731	3199	2929	1218	1345	987	10718
Katrineholm	3824	1338	1438	1135	9613	868	1035	473	299	338	4215
Kil	1504	787	433	464	2991	372	246	235	135	166	1570
Kinda	1306	1020	230	527	2383	262	249	156	146	132	1200
Kiruna	1308	450	433	536	7127	2069	511	334	994	180	3762
Klippan	2457	660	489	590	3482	264	232	681	235	194	2862
Knivsta	2688	796	786	629	1923	283	437	202	171	128	1318
Kramfors	1629	1832	379	527	6380	1179	383	172	236	186	3070
Kristianstad	12347	3506	4580	2218	17039	1754	1737	2040	1487	1087	11009
Kristinehamn	3111	1294	972	839	6595	1105	547	380	288	279	3405
Krokom	1319	1832	294	340	3169	603	469	132	229	186	2136
Kumla	1987	893	731	1066	5684	565	350	523	212	244	2225
Kungsbacka	17630	3716	4379	3715	9584	1373	1690	950	1319	629	6815
Kungsör	1161	539	302	280	1924	287	183	157	130	94	1177
Kungälv	6516	1961	2173	2165	8192	1261	1116	863	585	465	4072
Kävlinge	5380	942	1457	705	5973	377	432	1176	470	275	2808
Köping	2897	1254	813	728	6572	966	486	490	350	331	3983
Laholm	3958	2247	783	906	4076	523	487	867	333	315	3322
Landskrona	5581	687	2809	633	9398	889	673	1900	486	313	5859
Laxå	513	290	162	304	2038	212	76	138	66	68	913
Lekeberg	852	776	219	451	1574	184	161	212	90	106	909
Leksand	2509	1333	489	1034	3080	474	478	151	286	218	2077
Lerum	6815	1441	2320	1999	6251	1272	1450	575	630	390	3452
Lessebo	879	463	194	198	2332	367	171	144	93	115	1046
Lidingö	14386	1738	3241	2201	3135	598	1163	394	337	224	3954
Lidköping	5349	2102	1280	2094	9432	1524	1021	676	423	453	4689
Lilla Edet	1309	671	402	404	3140	583	280	381	219	144	1929
Lindesberg	2577	1750	622	765	6168	751	504	727	301	274	3316
Linköping	24321	6401	7656	6805	29196	4226	5492	1509	3314	1705	15991
Ljungby	3849	2327	830	1519	5948	741	585	538	271	356	3781
Ljusdal	2147	1623	491	553	4340	938	434	351	299	283	3763
Ljusnarsberg	453	321	97	118	1510	277	107	184	52	37	983
Lomma	5664	665	1398	673	2841	201	371	499	400	152	1475
Ludvika	2602	949	683	631	7695	1566	501	461	568	430	4231
Luleå	7959	3065	2802	2069	21982	3964	2682	607	1638	577	8907
Lund	19883	4780	8233	2952	17189	3934	6093	1695	2010	1060	11236
Lycksele	952	678	476	727	3906	568	210	132	145	114	2014
Lysekil	1918	445	950	553	3975	510	432	233	253	186	2120
Malmö	44232	4475	13769	5373	54732	8468	9425	7708	7120	2389	45617
Malung	1721	769	411	243	2465	513	157	135	113	151	1585
Malå	222	189	134	113	1155	234	30	14	39	33	502
Mariestad	3485	999	719	1135	6204	898	565	438	293	298	3442
Mark	4182	2424	1093	1597	7851	1306	819	595	625	445	4342
Markaryd	1112	582	208	704	2314	158	135	268	124	120	1527
Mellerud	1161	901	301	532	1934	284	177	241	126	129	1549
Mjölby	3411	1369	869	1142	6813	733	510	311	715	395	3284
Mora	2808	1640	592	579	4374	627	573	222	638	282	3536
Motala	5419	1594	1575	1530	11413	1512	1032	684	1100	614	5674
Mullsjö	933	320	222	883	1454	213	182	134	123	77	736
Munkedal	1214	860	354	483	2316	286	198	200	135	163	1686
Munkfors	237	241	138	68	1391	227	60	79	51	45	607
Mölndal	10030	2015	4190	2756	10801	2217	1982	1176	911	650	6917
Mönsterås	1427	1015	346	556	3812	432	231	303	125	147	1779
Mörbylånga	2210	1166	529	626	3055	361	371	265	174	163	1518
Nacka	21467	2810	5024	3075	9732	2126	3250	623	915	569	8147
Nora	1180	572	425	393	2740	348	295	260	149	129	1518
Norberg	573	233	158	117	1562	442	147	107	168	90	922
Nordanstig	829	1133	289	302	2230	415	201	213	212	152	1767
Nordmaling	553	736	386	302	2157	283	116	71	65	72	1077
Norrköping	19924	4303	4553	4867	28252	4454	4200	2165	3477	1509	17630
Norrtälje	10613	3157	2211	2096	10418	1590	1616	690	723	826	8083
Norsjö	201	421	125	249	1354	264	45	27	56	46	745
Nybro	2355	1493	452	865	5505	656	334	376	395	234	2787
Nykvarn	1697	350	351	286	1597	139	203	140	142	105	900
Nyköping	7543	2337	2152	2409	12893	1536	1653	775	624	699	6183
Nynäshamn	4677	767	988	897	5209	856	771	441	334	254	3399
Nässjö	3532	1471	763	2578	7516	989	640	582	318	379	3700
Ockelbo	549	621	113	148	1642	339	119	74	81	99	1053
Olofström	1142	543	416	410	4059	496	192	482	125	171	2045
Orsa	894	664	178	234	1481	295	217	138	152	97	1067
Orust	2517	1139	783	784	3027	495	467	255	306	193	2031
Osby	1465	757	420	592	3259	314	221	493	117	140	1932
Oskarshamn	3482	990	797	1389	7273	1114	461	665	257	366	3692
Ovanåker	968	1690	327	839	2728	304	198	145	178	161	1894
Oxelösund	1285	238	397	321	3522	563	329	157	132	173	1571
Pajala	406	193	91	226	1859	924	85	55	210	51	1219
Partille	5726	931	2163	1707	6158	1242	1058	571	694	285	3805
Perstorp	913	278	216	224	1591	211	66	237	154	58	1259
Piteå	2856	1914	1095	1371	15380	2305	1028	219	977	343	4526
Ragunda	432	625	92	99	1597	396	99	67	84	91	1068
Robertsfors	436	1240	172	281	1746	273	137	34	93	71	948
Ronneby	3888	1634	1067	824	7570	1128	618	1065	374	357	3873
Rättvik	1506	1038	385	371	2441	281	277	171	306	142	1842
Sala	3011	1872	824	854	4650	745	463	355	326	321	3156
Salem	2980	415	803	536	2412	343	490	215	192	98	1441
Sandviken	4000	1781	1144	1023	10835	2021	759	547	712	368	5510
Sigtuna	7108	1079	1560	1300	6751	837	915	521	434	348	5290
Simrishamn	3752	1181	745	817	3672	425	580	536	447	256	3180
Sjöbo	3018	1070	530	602	3284	304	275	912	204	237	2993
Skara	2936	1053	708	775	4427	557	477	346	235	217	2540
Skellefteå	5076	4624	2750	2891	23134	4111	1959	631	805	809	9369
Skinnskatteberg	399	256	157	106	1347	254	95	82	77	45	736
Skurup	2453	747	549	389	2978	236	248	656	205	160	2075
Skövde	7885	2726	2089	2291	11625	1552	1240	939	659	643	6832
Smedjebacken	1104	502	219	236	3672	523	195	148	240	143	1572
Sollefteå	1700	1368	525	603	6672	1193	465	283	243	230	3454
Sollentuna	14841	2152	3917	2749	7867	1478	1883	484	719	422	6020
Solna	14781	1998	4188	1996	9528	2343	2745	622	916	608	8444
Sorsele	213	301	71	156	695	136	48	24	38	37	554
Sotenäs	1837	387	626	589	1929	223	201	131	164	101	1347
Staffanstorp	4642	671	1102	551	4132	287	425	668	422	227	1975
Stenungsund	3907	1040	1269	1030	4420	710	708	372	600	258	2779
Stockholm	169211	27257	48476	24327	111765	35616	45030	7912	12861	6550	104329
Storfors	429	232	99	125	1444	237	61	78	56	39	621
Storuman	608	481	243	386	1590	325	104	45	103	80	1207
Strängnäs	6130	1432	1562	1268	6148	704	883	418	377	369	3914
Strömstad	1322	832	590	382	2068	299	317	106	132	129	1974
Strömsund	1123	1165	221	237	3933	829	180	155	223	148	2021
Sundbyberg	6907	944	1897	904	6146	1438	1446	443	527	369	5137
Sundsvall	12436	4871	4300	3002	24921	3927	2639	1667	1409	1008	13396
Sunne	1979	1661	433	476	2858	329	271	205	143	166	1955
Surahammar	813	271	335	238	3056	475	175	142	159	118	1603
Svalöv	1713	1030	444	321	2672	225	228	729	125	146	1855
Svedala	3537	532	953	451	4245	257	316	1083	276	199	2012
Svenljunga	1464	992	381	467	2083	157	134	177	242	144	1637
Säffle	2015	1666	508	683	3589	409	241	382	273	194	2501
Säter	1347	1047	330	379	2517	454	256	167	242	180	1605
Sävsjö	1385	910	257	1422	2068	208	123	324	98	133	1302
Söderhamn	2455	1774	661	800	7386	1456	554	584	548	335	4338
Söderköping	2542	1039	475	677	2744	392	467	242	312	164	1713
Södertälje	11505	2304	3067	3109	15438	2403	2759	829	1506	629	12634
Sölvesborg	2837	580	487	535	4294	476	238	821	174	229	2323
Tanum	1991	1409	649	528	1874	259	352	160	201	195	1895
Tibro	1291	642	458	675	2642	299	188	217	151	115	1478
Tidaholm	1364	682	334	572	3850	440	235	261	161	152	1567
Tierp	1764	1722	666	656	5495	656	431	377	239	250	3102
Timrå	1365	937	497	475	5772	835	303	379	248	181	2592
Tingsryd	2046	1238	324	592	2630	314	230	301	125	174	1966
Tjörn	2871	618	1080	1546	2416	387	407	193	216	167	1715
Tomelilla	2079	886	393	399	2458	244	245	632	189	154	2285
Torsby	1675	918	253	304	3507	654	192	227	112	165	2197
Torsås	920	787	169	400	1663	139	143	179	94	94	1045
Tranemo	1532	1271	417	473	2612	256	222	281	174	144	1516
Tranås	2443	763	593	1388	4461	509	422	322	204	190	2449
Trelleborg	5775	1176	1554	1430	9638	630	668	2174	1196	405	5763
Trollhättan	6049	1801	2188	1762	15926	1733	1373	627	680	582	7155
Trosa	2372	423	531	471	2091	226	333	130	162	115	1166
Tyresö	9313	1174	2252	1431	6321	1176	1460	363	623	423	4150
Täby	20913	2011	4359	2909	5379	810	1469	411	582	359	5409
Töreboda	1167	770	221	380	2191	286	170	165	148	121	1552
Uddevalla	7139	1891	2311	2424	11987	1612	1436	1110	943	638	6957
Ulricehamn	3364	2060	798	1380	4296	560	587	406	564	298	2889
Umeå	11681	7429	4845	3963	27279	6058	6416	643	2360	1124	12882
Upplands-Väsby	7326	848	1907	1338	6501	1225	1093	531	445	339	5308
Upplands-Bro	3860	532	930	1012	3925	684	609	320	233	222	2742
Uppsala	31252	10002	13079	8165	31237	7577	9097	2319	3479	1829	22552
Uppvidinge	1146	892	190	361	2114	338	149	319	86	129	1367
Vadstena	1389	405	269	397	1788	213	211	130	171	77	938
Vaggeryd	1542	651	357	1484	2907	271	192	297	88	130	1578
Valdemarsvik	1193	768	217	343	2094	206	142	130	121	75	1120
Vallentuna	6911	1230	1447	1162	3435	553	1002	294	384	266	2729
Vansbro	706	676	155	395	1663	316	98	123	115	131	1137
Vara	2832	1587	483	772	3187	409	230	222	191	187	2319
Varberg	8976	4301	2354	2165	12158	1653	1519	989	860	937	6902
Vaxholm	3014	446	578	502	1113	190	447	71	111	89	875
Vellinge	11952	781	1878	1205	3599	225	408	900	435	241	2536
Vetlanda	3220	2133	897	2358	5876	721	531	441	208	327	3494
Vilhelmina	402	579	270	450	2117	402	105	65	112	91	1141
Vimmerby	1768	1633	387	784	3755	391	328	290	163	235	2270
Vindeln	571	674	204	297	1363	165	83	42	81	54	987
Vingåker	1050	445	235	349	2909	227	254	159	76	86	1158
Vänersborg	4440	1945	1551	1722	9631	1357	1095	596	580	463	5090
Vännäs	629	920	223	356	2144	418	215	47	92	57	1245
Värmdö	8850	1126	1737	1283	4614	884	1326	438	367	350	3485
Värnamo	4418	2118	995	3098	7184	595	551	769	259	349	4240
Västervik	4586	2116	1438	1328	10347	1258	950	478	345	405	5676
Västerås	21280	4256	8066	4802	28626	4186	3907	1775	2806	1852	18278
Växjö	13326	4356	3591	3845	16919	2733	2722	1390	997	867	9160
Vårgårda	1225	909	505	1107	1968	279	311	211	148	114	1244
Ydre	508	477	107	361	772	90	96	64	31	66	434
Ystad	5467	1102	1113	872	6354	469	568	800	509	347	4151
Älmhult	2303	1196	458	741	3536	322	331	440	105	185	2211
Älvdalen	778	640	179	233	1874	206	118	147	244	143	1385
Älvkarleby	813	254	276	206	3022	423	192	209	163	122	1208
Älvsbyn	425	470	168	256	3105	617	114	85	240	68	1217
Ängelholm	8684	1718	1741	1791	6666	666	896	1141	968	474	5476
Åmål	1395	846	385	485	3354	439	318	182	188	197	2034
Ånge	901	784	220	324	3135	551	170	211	159	124	1802
Åre	1380	1117	257	298	1883	376	402	90	149	149	1563
Årjäng	956	925	407	493	1579	230	116	144	98	112	1807
Åsele	206	337	99	134	1048	144	22	33	48	28	502
Åstorp	1734	425	376	370	3354	215	133	625	179	158	2304
Åtvidaberg	1466	762	311	519	3441	345	230	160	177	186	1448
Öckerö	2271	268	743	1733	1922	326	357	181	196	154	1099
Ödeshög	709	436	136	464	1215	131	129	97	90	63	719
Örebro	16950	5062	7006	6541	30623	4804	4849	2858	1937	1447	16040
Örkelljunga	1455	428	331	763	1631	131	106	411	244	101	1548
Örnsköldsvik	5255	4581	1567	2966	17368	1429	998	345	796	609	7436
Östersund	6985	5787	1823	1405	14052	2979	2273	471	966	817	8796
Österåker	9557	1261	2106	1658	5138	818	1254	410	378	330	3881
Östhammar	3037	1693	781	707	5094	568	473	302	259	297	3419
Östra Göinge	1527	676	471	574	3785	301	219	485	195	214	2080
Överkalix	173	279	62	64	1427	307	51	19	58	21	675
Övertorneå	354	416	88	127	1222	327	75	28	148	36	944

## Sheet: 2010
	M	C	FP	KD	S	V	MP	SD	Other	Invalid	Nonvoters
Ale	4768	839	1094	976	5577	1028	1012	1367	237	242	3022
Alingsås	7000	1551	2506	2194	6454	1546	2382	1191	266	289	3707
Alvesta	3546	1316	549	635	3624	527	507	916	89	149	2275
Aneby	958	522	214	749	1129	127	195	323	24	60	695
Arboga	2259	496	582	387	3218	487	535	512	89	131	1711
Arjeplog	286	114	117	96	922	230	90	97	21	30	520
Arvidsjaur	589	319	182	88	2383	491	115	197	47	43	842
Arvika	3886	1377	902	704	6431	1076	1040	893	173	240	3637
Askersund	1949	615	376	458	3002	352	377	443	56	122	1388
Avesta	3289	897	684	496	6320	778	710	1034	137	208	2840
Bengtsfors	1389	652	314	351	2310	309	294	339	47	101	1480
Berg	998	819	125	120	1842	247	248	217	54	79	1152
Bjurholm	425	226	129	104	578	57	31	39	10	9	325
Bjuv	2124	305	405	219	3332	262	286	1223	56	108	2143
Boden	3880	677	876	597	9255	1476	783	846	183	157	3018
Bollebygd	1812	395	355	358	1453	255	335	448	57	64	783
Bollnäs	3676	1574	888	700	6063	1123	880	1386	176	236	4210
Borgholm	2329	1236	364	537	1709	261	453	380	71	100	1400
Borlänge	7142	1652	1532	1075	12164	2039	1853	2842	457	421	5544
Borås	18978	3091	5018	4014	20800	3644	4216	4616	816	722	11968
Botkyrka	12401	1147	2560	2110	14761	2943	2849	2048	559	359	11225
Boxholm	720	323	131	182	1616	204	176	193	18	62	529
Bromölla	1758	276	428	223	3230	364	310	1210	54	138	1490
Bräcke	767	530	149	59	2178	298	167	172	48	60	963
Burlöv	2909	254	652	232	3160	353	496	1177	180	92	2278
Båstad	4308	1185	722	702	1493	183	538	549	89	126	1704
Dals-Ed	765	445	129	260	800	109	104	172	29	48	665
Danderyd	10740	2297	2075	2744	1195	250	798	347	157	72	2167
Degerfors	898	264	204	295	3423	700	319	349	42	69	1057
Dorotea	208	171	137	48	999	174	15	53	26	39	449
Eda	988	534	163	175	1868	202	121	249	48	75	1209
Ekerö	7553	1169	1498	1136	2120	507	1321	540	184	118	1778
Eksjö	3080	1196	640	1208	2982	387	563	623	72	159	1963
Emmaboda	1431	672	183	322	2443	317	283	349	67	85	1092
Enköping	8755	2527	1330	1164	7325	896	1511	1370	283	366	4754
Eskilstuna	15352	2713	3903	2579	21003	3186	4623	4646	583	724	11894
Eslöv	5650	1324	1330	540	6138	610	908	2258	306	247	4038
Essunga	1158	464	186	236	1081	142	154	228	37	57	630
Fagersta	1611	258	369	281	3374	672	384	587	69	134	1683
Falkenberg	7675	3358	1820	1285	7964	974	1587	1536	373	413	4787
Falköping	5669	1892	1055	1595	6356	949	1079	1580	192	250	3722
Falun	10558	2942	2092	1813	11523	2009	2963	2007	652	542	6368
Filipstad	1272	258	278	193	3544	558	248	423	63	88	1455
Finspång	3048	771	634	803	6042	839	800	723	100	193	2420
Flen	2451	831	488	496	3923	561	599	700	92	130	1851
Forshaga	1571	444	383	318	3515	399	362	388	65	84	1187
Färgelanda	1032	628	206	220	1438	173	127	361	32	83	842
Gagnef	1548	802	266	373	2284	326	396	475	72	100	1102
Gislaved	5066	1741	950	1357	6142	515	700	1286	104	255	3598
Gnesta	1946	588	384	265	1897	374	649	397	103	81	1156
Gnosjö	1464	454	279	1105	1712	156	165	404	44	92	1099
Gotland	9731	5657	1785	1128	12855	2342	3259	1225	658	617	6980
Grums	1218	426	224	196	2838	310	215	317	75	80	1294
Grästorp	1210	541	199	161	1170	135	138	240	40	60	609
Gullspång	794	262	170	187	1536	177	128	217	26	54	640
Gällivare	1705	205	272	284	6702	1629	459	599	145	78	2902
Gävle	16677	2827	4189	2349	21208	4186	4600	4566	721	747	11174
Göteborg	96981	12183	26829	19484	80543	27246	34205	15608	6223	3156	67363
Götene	2214	760	538	709	3003	423	553	415	79	127	1332
Habo	2104	381	419	1135	1873	215	358	426	32	97	775
Hagfors	1181	585	333	177	4405	754	215	439	136	80	1731
Hallsberg	2058	622	477	524	4463	585	484	663	79	155	1621
Hallstahammar	1881	321	558	395	4325	668	437	521	97	136	1997
Halmstad	18910	3641	4534	3043	19424	2370	3849	3150	1015	744	10940
Hammarö	3114	444	746	550	3472	490	578	383	121	89	1246
Haninge	16161	1703	3009	1970	12313	2210	3206	2524	825	492	9080
Haparanda	755	322	66	115	2655	191	103	165	22	37	1806
Heby	1979	1197	429	460	2818	402	354	578	105	158	1905
Hedemora	2311	926	341	446	3525	623	589	803	122	134	2186
Helsingborg	28639	2649	6234	3450	21910	2693	5167	7115	1224	898	18197
Herrljunga	1503	792	440	549	1651	296	322	482	44	99	1041
Hjo	1716	434	448	501	1831	274	391	307	48	72	984
Hofors	967	250	308	123	3089	684	262	458	79	84	1276
Huddinge	20769	2362	4127	2794	13320	2870	4090	2569	798	494	10582
Hudiksvall	5126	2376	953	1040	8677	1905	1680	1337	378	369	5283
Hultsfred	1819	1029	326	754	3436	476	349	537	71	125	1866
Hylte	1558	773	403	311	2108	195	232	423	100	80	1288
Hällefors	812	215	165	114	2332	329	203	330	56	65	966
Härjedalen	1498	634	258	158	3004	404	256	470	57	118	1653
Härnösand	3612	1200	884	665	6491	1039	1309	650	299	133	3197
Härryda	7796	1286	2248	1376	4697	990	1631	1212	255	238	2946
Hässleholm	9248	2542	1877	1857	9004	1023	1919	4103	273	404	6276
Håbo	5097	601	860	564	2983	368	653	701	132	153	1950
Höganäs	6823	862	1459	1079	3258	415	947	1026	241	174	2680
Högsby	768	409	122	219	1494	156	134	271	41	53	750
Hörby	3048	901	549	388	2076	238	416	1282	276	116	2066
Höör	3300	594	687	439	2172	356	707	1097	172	124	1889
Jokkmokk	455	128	169	65	1764	348	259	123	40	40	792
Järfälla	14479	1664	3357	2370	10217	2096	3094	1915	543	347	7091
Jönköping	23040	4366	5239	11190	24397	3948	5301	4583	621	946	13715
Kalix	1563	545	413	240	6583	713	590	394	61	106	2065
Kalmar	12430	2712	2592	2320	13778	2007	3304	2267	453	571	6744
Karlsborg	1244	509	356	303	1556	155	201	270	32	97	757
Karlshamn	5426	1023	1099	722	7709	1253	1299	1947	188	279	3661
Karlskoga	4547	612	1036	937	9062	1037	1058	910	368	193	3690
Karlskrona	11905	2304	2695	1777	14651	1814	2312	3682	352	549	6137
Karlstad	17246	3193	4347	3068	19008	3160	4620	2399	668	634	9418
Katrineholm	5175	1308	1399	885	7956	955	1566	1299	165	278	3784
Kil	1987	695	431	390	2907	396	408	359	77	98	1343
Kinda	1634	864	326	435	2094	309	410	408	47	97	1018
Kiruna	1922	374	468	469	7520	2031	759	827	165	148	3164
Klippan	2978	552	496	506	3078	389	358	1184	112	147	2439
Knivsta	3435	830	856	636	1720	311	664	399	130	78	1197
Kramfors	2011	1268	396	440	6485	1079	595	397	164	149	2447
Kristianstad	15864	2711	4519	1893	14385	1677	2755	5948	487	675	9717
Kristinehamn	4049	971	966	703	6472	1009	869	712	174	183	2923
Krokom	1905	1619	287	289	3302	570	557	311	87	163	1841
Kumla	3045	672	821	900	5354	543	610	943	134	165	2050
Kungsbacka	22404	3630	4789	3611	7797	1261	2799	2241	655	457	5943
Kungsör	1420	358	362	249	1840	294	260	370	53	86	951
Kungälv	9134	1817	2490	1965	7156	1217	1740	1707	276	341	3706
Kävlinge	7363	972	1591	663	4676	389	865	1677	226	209	2607
Köping	3648	998	831	608	6369	1053	792	1087	160	172	3307
Laholm	5058	1956	869	710	3822	476	690	1321	233	196	2925
Landskrona	6877	605	2849	602	8730	999	1058	2408	233	238	5457
Laxå	750	219	199	244	1887	198	115	212	23	50	726
Lekeberg	1179	615	208	422	1463	212	253	358	51	59	759
Leksand	3218	965	546	899	2964	425	665	410	153	173	1835
Lerum	8758	1268	2505	1738	5565	1277	2194	1336	289	289	2935
Lessebo	1204	375	218	151	2076	285	286	379	21	92	862
Lidingö	13922	2879	3064	2869	2637	554	1619	759	256	150	3586
Lidköping	6792	1842	1734	1687	9095	1462	1651	1307	212	312	3867
Lilla Edet	1723	503	460	295	2926	562	359	777	109	91	1736
Lindesberg	3495	1183	741	718	5732	685	773	1368	150	164	2740
Linköping	29359	6084	8439	6098	26419	4522	8966	4323	1634	1034	14135
Ljungby	4833	2225	878	1237	5317	737	878	1058	160	274	3392
Ljusdal	2822	1114	516	424	4336	870	605	813	221	208	3157
Ljusnarsberg	615	175	102	113	1406	251	142	305	61	49	778
Lomma	7079	781	1515	795	2021	201	698	834	300	144	1363
Ludvika	3425	641	833	549	7466	1363	842	1251	182	258	3530
Luleå	10036	2500	2863	1749	22972	3856	3584	1742	748	445	7444
Lund	23073	4775	8004	3596	14018	4155	9178	3586	1558	755	10622
Lycksele	1359	355	415	657	3979	697	265	294	51	80	1718
Lysekil	2482	409	973	454	3551	540	633	560	86	128	1841
Malmö	55160	4795	11768	5274	48450	10118	14861	13256	5426	1559	43659
Malung	2002	548	388	171	2434	449	200	382	98	120	1415
Malå	306	73	141	89	1108	268	55	56	15	29	454
Mariestad	4363	821	864	884	5762	917	948	806	161	235	3042
Mark	5326	2017	1643	1458	7394	1222	1245	1267	198	279	3693
Markaryd	1603	564	208	589	1945	166	209	540	36	86	1259
Mellerud	1526	765	354	372	1715	291	260	443	43	74	1298
Mjölby	4430	1161	1085	963	6440	862	980	823	278	222	2860
Mora	3468	1169	631	584	4666	600	772	787	253	208	2989
Motala	6645	1285	1726	1274	11902	1520	1448	1580	358	311	4566
Mullsjö	1181	229	238	869	1283	223	268	280	43	51	643
Munkedal	1663	753	339	448	2092	327	250	458	57	91	1415
Munkfors	292	181	147	71	1393	165	65	122	48	23	482
Mölndal	12807	1854	4008	2542	9667	2060	3326	2185	532	417	6158
Mönsterås	2014	905	372	490	3442	474	383	572	77	108	1489
Mörbylånga	2962	1048	548	613	2671	405	594	561	88	137	1331
Nacka	24153	4040	4950	3799	8797	2207	4765	1510	709	403	7528
Nora	1631	417	433	371	2725	301	412	389	66	106	1222
Norberg	747	172	176	108	1582	411	217	274	42	69	716
Nordanstig	1144	692	339	298	2292	427	278	515	93	92	1469
Nordmaling	809	497	312	254	2128	336	155	156	32	31	963
Norrköping	24647	3806	4920	4249	26550	4625	6478	5000	1456	985	15935
Norrtälje	13053	2886	2384	1771	9566	1612	2601	1824	455	510	7419
Norsjö	309	270	149	161	1322	341	75	64	38	32	630
Nybro	3141	1277	467	782	4956	782	512	739	179	208	2486
Nykvarn	2353	287	392	284	1348	143	347	410	84	63	799
Nyköping	9479	2035	2376	1837	11688	1618	2787	1805	374	384	5664
Nynäshamn	5665	721	1022	773	4745	867	1171	986	221	222	3133
Nässjö	4526	1314	920	2073	6454	940	977	1445	136	257	3305
Ockelbo	766	484	133	113	1589	236	211	302	38	58	878
Olofström	1552	502	300	373	3859	462	299	802	68	116	1797
Orsa	940	453	202	207	1599	273	292	400	58	68	955
Orust	3532	920	870	661	2669	494	668	492	125	152	1761
Osby	1949	724	378	437	2742	240	425	1021	46	120	1620
Oskarshamn	4770	852	984	1261	6400	974	724	1074	176	243	3161
Ovanåker	1392	1159	265	739	2785	269	308	387	68	140	1774
Oxelösund	1719	211	394	248	3288	577	534	356	107	92	1331
Pajala	512	132	86	225	2085	766	85	157	17	35	929
Partille	7495	892	2213	1562	5485	1137	1690	1291	371	219	3375
Perstorp	1141	228	205	162	1445	190	175	448	59	55	1061
Piteå	3962	1410	1194	1134	16143	2289	1517	685	264	248	3751
Ragunda	523	491	63	55	1799	283	125	136	77	73	881
Robertsfors	616	943	174	271	1858	337	196	109	52	60	797
Ronneby	5006	1407	878	662	6478	1098	929	2042	178	244	3192
Rättvik	1899	800	367	350	2438	268	441	437	159	125	1617
Sala	3706	1589	849	689	4716	676	826	896	137	210	2666
Salem	3558	528	850	496	2086	371	723	477	126	97	1353
Sandviken	5039	1348	1194	897	10536	1931	1223	1438	273	323	4665
Sigtuna	8720	1016	1617	1354	6365	875	1432	1145	282	217	5000
Simrishamn	4620	948	785	592	3381	432	873	967	172	173	2795
Sjöbo	3914	964	543	433	2626	328	463	1772	146	176	2584
Skara	3537	878	697	667	4140	552	763	677	127	139	2093
Skellefteå	6852	2865	2750	2568	23795	4568	2780	1404	438	514	8155
Skinnskatteberg	512	189	229	86	1336	217	157	198	26	26	551
Skurup	3195	665	575	256	2391	249	385	1227	144	130	1829
Skövde	10105	2512	2428	2110	10342	1569	2106	1750	438	485	5838
Smedjebacken	1421	364	243	191	3664	479	298	461	79	102	1269
Sollefteå	2097	870	468	369	7069	952	615	604	476	128	2635
Sollentuna	16507	2722	3831	2991	6952	1504	2845	1235	497	316	5635
Solna	16338	2475	3898	2314	8823	2600	4292	1478	694	380	8162
Sorsele	247	185	57	122	686	192	53	64	13	31	482
Sotenäs	2453	286	512	502	1707	235	272	261	41	71	1124
Staffanstorp	5994	717	1135	532	3149	300	724	1220	317	140	1897
Stenungsund	5609	924	1330	971	4014	646	1099	754	199	219	2437
Stockholm	183421	33895	45939	28244	111688	39565	65351	16950	9834	4147	95430
Storfors	495	177	90	108	1397	200	96	156	31	28	513
Storuman	711	378	214	298	1650	350	137	128	45	49	1074
Strängnäs	7268	1376	1591	1109	5526	868	1375	1309	204	279	3533
Strömstad	1910	711	561	342	1826	275	552	295	55	119	1764
Strömsund	1386	847	182	168	3992	648	229	381	63	147	1721
Sundbyberg	8007	1052	1823	928	5998	1589	2285	1023	416	190	4875
Sundsvall	16428	3211	4171	2437	23976	3767	3922	3416	1153	676	11445
Sunne	2374	1457	424	384	2818	391	351	353	99	121	1741
Surahammar	1196	171	349	177	3026	485	254	432	69	102	1237
Svalöv	2167	924	454	272	2284	274	380	1039	115	106	1664
Svedala	4919	501	903	399	3010	276	572	1657	210	151	1831
Svenljunga	1862	909	418	335	1883	200	247	510	63	113	1296
Säffle	2736	1209	558	593	3350	387	436	635	74	135	2173
Säter	1856	828	324	299	2392	400	347	552	87	140	1413
Sävsjö	1752	862	309	1238	1770	209	196	647	19	75	1129
Söderhamn	3400	1158	659	552	7318	1183	871	1414	290	206	3555
Söderköping	3143	933	549	614	2450	396	663	470	118	124	1566
Södertälje	13405	1766	2804	2454	15457	2373	3758	2534	907	462	11825
Sölvesborg	3498	535	459	439	3823	448	450	1357	100	154	1988
Tanum	2579	1213	730	455	1737	271	494	344	78	127	1726
Tibro	1597	496	493	681	2485	292	300	435	44	101	1236
Tidaholm	1848	569	419	432	3678	456	404	524	64	118	1379
Tierp	2658	1344	588	471	5536	690	606	810	204	207	2502
Timrå	2123	628	562	328	5698	839	432	690	150	112	2158
Tingsryd	2378	1200	312	457	2303	274	297	569	41	120	1670
Tjörn	3725	578	1019	1362	2104	309	609	518	97	136	1500
Tomelilla	2469	781	358	228	2254	239	390	1065	167	142	1983
Torsby	1888	680	271	242	3440	561	215	328	141	103	1995
Torsås	1163	667	167	277	1562	176	212	330	35	58	862
Tranemo	1986	1048	439	410	2384	231	363	514	68	111	1245
Tranås	3171	762	634	1134	4110	458	742	753	59	131	2101
Trelleborg	8922	1037	1521	957	8025	661	1030	3604	445	322	5375
Trollhättan	8273	1268	2537	1501	14445	1995	2319	1695	346	437	6241
Trosa	3092	387	524	402	1758	261	555	432	76	76	1046
Tyresö	10995	1242	2200	1440	5616	1033	2143	1065	330	223	3892
Täby	20898	3221	4711	3599	4421	794	2141	958	393	245	5154
Töreboda	1427	667	226	306	2169	296	248	373	51	99	1295
Uddevalla	9623	1683	2211	2258	11177	1744	2333	2046	360	382	6105
Ulricehamn	4370	1813	1010	1170	3903	584	909	995	132	197	2528
Umeå	15800	5147	4987	3620	26766	8399	7935	1747	1358	745	11417
Upplands-Väsby	8397	918	1890	1265	6225	1184	1610	1104	307	206	4661
Upplands-Bro	4870	581	1144	972	3852	621	943	723	188	127	2555
Uppsala	37802	9681	11716	8248	30744	8158	14291	4916	2503	1306	19951
Uppvidinge	1450	811	225	302	1852	286	211	514	24	93	1165
Vadstena	1615	324	351	349	1708	204	341	259	46	75	718
Vaggeryd	2015	643	361	1212	2733	268	293	610	60	88	1423
Valdemarsvik	1396	635	223	278	1971	219	235	342	32	66	955
Vallentuna	8150	1336	1599	1185	3094	553	1402	725	263	191	2621
Vansbro	868	610	156	299	1777	256	113	266	53	91	976
Vara	3375	1267	574	633	2891	424	376	596	85	143	1988
Varberg	12273	3820	2871	2034	11204	1628	2411	1836	555	629	5924
Vaxholm	3433	602	657	487	877	216	535	188	88	61	824
Vellinge	13365	965	1957	1391	2123	195	726	1575	317	159	2311
Vetlanda	4265	1924	936	1914	5130	725	767	1114	105	194	3127
Vilhelmina	542	313	218	284	2408	392	129	199	168	61	889
Vimmerby	2574	1252	395	633	3583	422	463	638	100	171	1871
Vindeln	734	470	211	244	1488	211	111	117	35	30	770
Vingåker	1407	401	240	274	2424	237	377	426	55	80	969
Vänersborg	6257	1381	1792	1295	8173	1613	1716	1506	295	363	4239
Vännäs	993	614	286	296	2217	563	272	142	51	53	997
Värmdö	10630	1348	1767	1253	4085	835	1985	946	303	243	3287
Värnamo	5279	2465	995	2638	6601	604	913	1394	112	232	3764
Västervik	6230	1770	1327	1133	9642	1229	1302	1246	258	334	4756
Västerås	26482	3714	7711	4426	28436	4191	5597	5115	1424	957	15273
Växjö	16799	3983	3806	3158	15327	2776	4116	2729	547	650	8260
Vårgårda	1639	840	583	931	1883	288	438	415	60	88	1119
Ydre	656	410	132	289	723	74	126	149	9	34	330
Ystad	7160	1086	1226	662	5358	490	1039	1594	282	272	3789
Älmhult	2949	1085	471	582	3111	329	540	719	93	112	1809
Älvdalen	1052	489	142	173	1923	245	171	363	57	84	1091
Älvkarleby	1136	189	296	149	2875	401	304	466	58	86	1070
Älvsbyn	608	347	223	196	3073	659	154	292	71	38	978
Ängelholm	10421	1658	1670	1494	5783	685	1533	1955	392	383	5059
Åmål	1949	517	473	410	3123	420	476	429	64	106	1833
Ånge	1244	505	212	190	3278	453	207	386	103	89	1419
Åre	1732	949	338	257	2052	315	564	204	76	125	1314
Årjäng	1281	748	389	440	1662	173	158	346	51	100	1516
Åsele	273	192	116	109	1026	149	37	79	23	17	404
Åstorp	2345	355	384	306	3113	222	313	964	86	116	2107
Åtvidaberg	1924	630	369	392	3164	335	397	385	46	121	1243
Öckerö	3045	237	690	1627	1595	261	497	381	89	114	1017
Ödeshög	924	335	132	431	1085	133	205	207	30	66	604
Örebro	22812	4198	6653	6139	29969	5118	7100	4866	933	1017	14183
Örkelljunga	1687	377	336	661	1471	170	236	710	86	91	1412
Örnsköldsvik	7035	3503	1560	2554	17344	1513	1677	1121	655	403	6184
Östersund	9384	4598	1753	1234	14844	2575	3193	1231	485	502	7416
Österåker	11092	1407	2232	1522	4352	810	1833	853	292	263	3597
Östhammar	3888	1469	803	573	4861	619	610	763	181	211	2841
Östra Göinge	2142	534	519	359	3150	299	370	1188	84	156	1730
Överkalix	201	227	75	35	1516	268	60	91	14	12	502
Övertorneå	378	318	78	95	1462	293	72	94	11	23	672

## Sheet: 2014
	M	C	FP	KD	S	V	MP	SD	Other	Invalid	Nonvoters
Ale	3962	911	776	779	5774	1124	1005	2902	620	241	2901
Alingsås	5956	1760	1811	1806	7236	1576	2338	2846	987	218	3534
Alvesta	2481	1285	292	509	3758	493	423	2611	262	129	1909
Aneby	744	543	129	599	1288	114	213	731	64	44	548
Arboga	1852	498	349	315	3436	449	469	1387	220	101	1573
Arjeplog	182	127	61	64	818	222	64	273	40	31	462
Arvidsjaur	439	270	133	77	2255	440	71	565	76	42	770
Arvika	2962	1328	584	628	6621	1022	851	2320	502	211	3102
Askersund	1330	650	238	335	2906	338	317	1355	195	83	1191
Avesta	2264	825	453	439	6121	820	525	2837	370	159	2411
Bengtsfors	961	582	183	274	2274	225	200	1166	193	67	1199
Berg	809	742	84	82	1855	216	179	671	119	42	854
Bjurholm	338	194	89	98	597	79	28	162	22	9	302
Bjuv	1425	269	221	188	3425	296	312	2173	161	121	2011
Boden	2903	694	769	537	8779	1254	688	2770	496	138	2967
Bollebygd	1427	459	270	296	1569	252	304	1074	151	57	679
Bollnäs	2612	1444	526	546	6672	1012	720	3191	447	161	3338
Borgholm	1866	1115	264	385	1941	279	340	1160	237	87	1151
Borlänge	5713	1615	1181	1001	11825	1953	1768	5617	1067	406	5152
Borås	15679	3312	3513	3465	21131	3874	4572	9716	2033	695	12125
Botkyrka	9670	1185	2078	2472	15806	2989	3545	4495	1487	327	12596
Boxholm	545	305	101	164	1626	158	156	576	56	33	448
Bromölla	1231	242	238	170	3041	364	335	2282	126	90	1346
Bräcke	551	492	86	57	2002	260	120	533	125	50	821
Burlöv	2038	291	476	178	3548	418	588	1863	261	77	2339
Båstad	3497	1018	619	544	1835	217	635	1492	229	83	1533
Dals-Ed	536	398	81	206	850	80	77	587	77	38	571
Danderyd	10627	1516	2522	2234	1452	287	999	1126	501	65	2173
Degerfors	679	268	123	219	3287	520	259	927	144	60	1023
Dorotea	129	204	124	50	921	200	30	179	35	22	317
Eda	767	485	103	138	1814	217	86	661	73	68	1126
Ekerö	6613	1208	1250	1068	2734	542	1404	1590	604	145	1756
Eksjö	2282	1252	475	958	3439	381	603	1477	276	123	1682
Emmaboda	1001	670	105	243	2419	278	238	924	150	67	1001
Enköping	7068	2380	1329	1071	8067	985	1462	3607	729	319	4399
Eskilstuna	13052	2624	2680	2206	21722	3284	3721	10170	1758	734	11764
Eslöv	3999	1334	871	462	6556	745	1147	4290	582	245	3733
Essunga	895	422	105	159	1135	140	153	590	93	39	569
Fagersta	1209	195	207	205	3512	508	326	1455	192	86	1562
Falkenberg	6516	3177	1137	1104	9158	1094	1615	3666	632	320	4556
Falköping	4195	1940	707	1279	6820	888	1040	3696	538	190	3124
Falun	8871	3058	1711	1466	11555	2271	2749	4912	1658	478	5596
Filipstad	821	263	151	141	3081	446	203	1422	143	67	1334
Finspång	2247	714	461	635	6029	734	642	2146	363	171	2230
Flen	1892	762	347	355	3671	552	501	1802	254	99	1747
Forshaga	1135	496	233	266	3566	366	292	1066	177	70	1112
Färgelanda	552	586	138	159	1455	144	111	1020	83	59	713
Gagnef	1225	786	211	284	2214	348	293	1170	240	92	928
Gislaved	3973	1826	583	975	6427	555	665	2888	260	212	3205
Gnesta	1610	599	226	201	2081	404	529	911	319	75	1023
Gnosjö	1196	491	169	822	1757	150	197	916	72	70	1025
Gotland	8450	5317	1494	1095	12774	2308	2859	3259	2099	520	6291
Grums	900	439	140	181	2849	254	170	885	117	78	1105
Grästorp	908	501	127	160	1181	152	139	608	77	43	591
Gullspång	542	268	81	128	1435	179	106	556	99	28	590
Gällivare	1311	213	174	273	6117	1407	503	1843	267	85	2635
Gävle	13500	2753	3248	2087	21915	4310	3991	10170	2325	576	9857
Göteborg	79768	12696	24136	15389	79167	31272	32868	32240	26758	2662	69895
Götene	1669	827	335	550	3173	458	423	1136	254	112	1177
Habo	1644	472	270	974	2007	231	393	1119	144	100	671
Hagfors	841	525	165	165	4299	520	147	1139	142	65	1529
Hallsberg	1505	635	300	446	4485	519	447	1713	230	113	1380
Hallstahammar	1448	369	370	315	4343	587	389	1606	228	97	1866
Halmstad	15501	3940	3379	2454	21043	2816	3926	7824	2116	644	10397
Hammarö	2651	523	540	490	3876	470	627	857	240	70	1149
Haninge	13319	1640	2417	1719	14180	2377	3520	5741	1753	483	9296
Haparanda	573	363	76	118	2175	209	126	582	101	25	1829
Heby	1443	1156	237	427	3132	408	315	1454	252	144	1577
Hedemora	1756	920	278	306	3478	605	445	1732	403	127	1825
Helsingborg	22803	2812	4384	2859	24663	3422	5612	14555	2372	801	17651
Herrljunga	1183	796	266	439	1779	269	269	1089	169	80	898
Hjo	1404	473	311	388	1877	279	335	883	143	77	823
Hofors	681	274	171	106	2893	660	182	975	158	69	1163
Huddinge	17455	2426	3434	2357	15401	3068	4845	5981	2287	448	11408
Hudiksvall	3940	2233	687	809	9352	1698	1461	3349	821	242	4498
Hultsfred	1253	956	182	580	3468	362	237	1542	187	77	1677
Hylte	1061	739	258	200	2244	176	175	1135	135	46	1153
Hällefors	568	205	95	92	2078	289	138	790	143	35	940
Härjedalen	1160	707	142	130	2903	349	200	1027	147	77	1422
Härnösand	2530	1055	538	545	7063	1042	1136	1799	630	108	2808
Härryda	6829	1437	1905	1130	5222	1059	1843	2913	814	217	2794
Hässleholm	6204	1980	1255	1674	9754	1011	2260	7653	842	439	5799
Håbo	4262	613	613	537	3247	423	707	1874	340	142	1803
Höganäs	5709	892	1073	906	3706	497	1065	2488	510	151	2375
Högsby	532	386	69	194	1426	150	82	721	68	28	610
Hörby	1848	853	383	347	2367	259	458	2604	384	133	1833
Höör	2263	704	486	381	2579	425	785	2122	363	127	1602
Jokkmokk	299	80	105	44	1597	320	312	421	118	25	743
Järfälla	12229	1694	2586	2110	12049	2489	3268	4317	1458	277	7184
Jönköping	19020	5040	3626	9645	26475	3996	5932	10891	2204	778	12983
Kalix	1267	520	268	231	6113	692	449	1262	177	94	1911
Kalmar	10260	2954	1950	1941	14311	1974	3035	5744	1542	427	6246
Karlsborg	827	470	289	278	1689	153	173	854	88	53	627
Karlshamn	3923	1015	616	647	8114	1044	1192	3867	574	221	3489
Karlskoga	3713	682	653	719	8878	993	947	2858	434	179	3350
Karlskrona	8848	2493	2225	1674	15522	1954	2309	6603	1099	368	5917
Karlstad	14227	3480	3244	2760	21188	3332	4735	5842	2303	549	8651
Katrineholm	4064	1356	906	745	8432	999	1278	3054	517	209	3518
Kil	1495	679	261	334	3094	417	361	1164	177	91	1163
Kinda	1285	698	211	420	2119	306	331	1113	199	59	917
Kiruna	1540	441	339	508	7090	1738	779	1976	553	157	2812
Klippan	1923	531	281	409	3392	346	386	2581	228	136	2263
Knivsta	2977	777	630	653	2111	383	774	1048	363	113	1212
Kramfors	1410	1188	208	298	6447	930	413	1209	345	93	2204
Kristianstad	11650	2687	3331	1697	15452	1606	3073	11127	1249	575	9548
Kristinehamn	3122	1018	776	620	6664	906	820	1846	401	149	2625
Krokom	1631	1443	216	259	3421	615	432	988	248	100	1557
Kumla	2430	684	675	783	5165	578	672	2198	344	179	1929
Kungsbacka	19909	3975	4254	2884	8936	1506	3160	6281	1481	442	5649
Kungsör	998	384	262	235	1936	268	193	931	125	54	863
Kungälv	7527	1904	1910	1643	7760	1399	1850	3921	904	256	3552
Kävlinge	5677	1081	1237	548	5237	396	1129	3657	367	205	2246
Köping	2773	965	587	498	6487	886	632	2781	329	161	3096
Laholm	3882	1764	612	607	4234	468	793	2867	434	194	2575
Landskrona	5044	717	1767	502	9468	1063	1267	4768	758	252	5673
Laxå	518	209	110	203	1649	207	122	679	63	39	626
Lekeberg	835	663	155	334	1480	210	210	897	155	61	655
Leksand	2511	1056	403	787	3110	515	614	1247	341	123	1533
Lerum	7105	1549	2050	1461	6121	1309	2196	3123	1039	247	3007
Lessebo	817	343	103	122	2081	289	230	902	127	66	741
Lidingö	13224	2074	3439	2328	3238	606	1899	1900	860	144	3698
Lidköping	5280	1868	1363	1433	9641	1507	1559	3329	718	274	3602
Lilla Edet	1245	508	281	246	2849	519	338	1836	254	95	1679
Lindesberg	2587	1144	433	568	5670	662	714	3204	366	134	2349
Linköping	24281	6157	6988	5790	29210	4709	8268	11214	3755	1087	13804
Ljungby	3590	1812	551	1033	5920	742	737	2905	422	203	3113
Ljusdal	2278	1041	383	291	4420	676	592	2009	429	135	2517
Ljusnarsberg	385	161	72	68	1314	208	103	743	76	45	620
Lomma	6176	905	1531	769	2690	203	897	1954	348	86	1197
Ludvika	2590	691	522	402	6836	1287	780	3363	370	258	2906
Luleå	8226	2380	2281	1664	23092	3856	3431	4567	2185	364	7346
Lund	17244	4293	7400	3025	17159	4865	9350	6987	5521	682	9864
Lycksele	1127	327	297	575	3667	824	185	834	135	71	1591
Lysekil	1754	517	604	412	3451	594	566	1549	299	92	1711
Malmö	41510	4850	10000	4620	52460	13598	15367	24171	12527	1604	45944
Malung	1506	575	247	157	2414	315	181	1154	125	94	1169
Malå	177	96	94	62	1041	266	47	218	49	21	414
Mariestad	3524	1032	581	746	5968	843	820	2179	372	200	2667
Mark	4193	1972	1145	1149	7352	1244	1196	3274	636	267	3525
Markaryd	1166	443	101	441	2048	143	207	1253	137	69	1150
Mellerud	1053	719	186	276	1748	209	190	1205	123	64	1179
Mjölby	3726	1135	756	846	6685	771	770	2644	399	223	2683
Mora	2629	1338	386	416	4776	605	625	2279	403	145	2504
Motala	5285	1423	1257	1069	11268	1366	1377	4601	681	306	4277
Mullsjö	793	241	161	809	1357	230	284	761	116	54	582
Munkedal	1281	640	211	330	2090	362	209	1262	179	80	1302
Munkfors	239	152	87	49	1430	114	51	280	61	11	434
Mölndal	10369	2054	3395	2165	10265	2337	3688	4695	1669	429	5845
Mönsterås	1494	852	210	376	3449	396	270	1620	163	91	1273
Mörbylånga	2513	982	413	458	2972	380	561	1536	312	101	1101
Nacka	21946	3732	5044	3100	10479	2514	5657	3849	2793	401	7597
Nora	1132	519	244	268	2734	377	353	1068	229	73	1147
Norberg	535	163	107	85	1447	334	161	766	168	46	623
Nordanstig	907	583	212	227	2398	357	228	1127	165	77	1130
Nordmaling	631	527	238	214	1996	425	107	433	73	45	890
Norrköping	19995	3856	3912	3937	26680	4706	5963	14045	3164	865	14986
Norrtälje	10723	2845	1784	1391	11478	1726	2417	4762	1318	454	6663
Norsjö	227	219	95	130	1323	323	33	255	29	32	545
Nybro	2246	1359	335	598	4780	694	438	2232	319	147	2214
Nykvarn	1926	355	273	234	1603	155	339	1097	124	74	733
Nyköping	8212	2139	1606	1554	12139	1722	2659	4477	1176	393	5186
Nynäshamn	4481	739	908	653	5198	865	1082	2505	564	165	3012
Nässjö	3203	1350	543	1767	6502	794	989	3713	357	183	2871
Ockelbo	502	440	83	86	1489	229	142	804	106	37	680
Olofström	1123	473	168	287	3839	413	295	1602	172	118	1641
Orsa	666	493	127	147	1523	261	230	956	204	33	830
Orust	2580	904	627	478	2893	557	571	1604	345	138	1591
Osby	1331	488	219	401	2904	282	350	2094	175	104	1411
Oskarshamn	3704	810	767	1017	6662	864	584	2866	341	207	2761
Ovanåker	1108	1028	167	632	2802	291	270	1228	158	78	1355
Oxelösund	1301	206	260	209	3348	604	398	1066	205	94	1257
Pajala	383	133	63	212	1859	722	92	457	103	32	960
Partille	6346	1047	1863	1253	5778	1422	1857	2698	978	187	3578
Perstorp	727	203	128	116	1549	136	175	1055	82	49	1002
Piteå	3389	1449	855	1024	15655	2340	1351	2218	922	210	3724
Ragunda	333	454	43	58	1719	255	97	491	101	48	712
Robertsfors	502	756	130	207	1907	403	154	307	141	36	751
Ronneby	3335	1289	653	534	6731	972	732	4028	421	174	2877
Rättvik	1593	760	270	257	2362	337	359	1270	250	116	1375
Sala	2888	1600	587	522	4867	670	678	2238	479	183	2365
Salem	2984	515	672	549	2425	412	755	1108	308	75	1358
Sandviken	3830	1273	921	677	10816	1763	961	3789	711	224	4023
Sigtuna	7406	1055	1237	1264	6930	1130	1600	3137	767	204	5253
Simrishamn	3284	995	593	475	3413	473	761	2512	588	132	2368
Sjöbo	2743	916	337	400	2798	278	461	3544	353	141	2239
Skara	2643	955	439	521	4249	540	660	1976	349	131	1849
Skellefteå	5210	2832	1865	1940	24468	4552	2575	3809	1528	525	7544
Skinnskatteberg	388	187	149	70	1245	185	86	528	71	19	519
Skurup	2259	643	360	223	2736	320	373	2396	246	124	1620
Skövde	8399	2605	1963	1751	11618	1405	2029	4507	1128	383	5317
Smedjebacken	1109	401	139	158	3262	493	269	1365	195	81	1078
Sollefteå	1377	857	270	267	7037	865	402	1681	352	123	2281
Sollentuna	15106	2337	3689	2687	8445	1762	3448	2984	1420	307	5940
Solna	13986	2294	3795	2074	10543	3113	4687	3606	2666	281	7740
Sorsele	175	149	26	92	612	209	47	204	34	31	407
Sotenäs	1997	329	421	345	1848	250	235	788	137	69	1013
Staffanstorp	4597	791	927	496	3756	349	877	2553	420	131	1715
Stenungsund	4712	975	1082	726	4562	702	1053	2276	467	164	2270
Stockholm	160166	28201	45365	24691	124792	44656	64392	38356	46946	3500	96079
Storfors	320	171	46	95	1286	162	59	459	29	33	419
Storuman	510	365	155	254	1567	397	117	450	66	52	902
Strängnäs	6307	1198	1188	1068	6017	1003	1282	3225	601	239	3248
Strömstad	1602	663	509	286	1876	319	532	941	228	66	1605
Strömsund	892	788	83	160	3858	556	171	1092	155	99	1512
Sundbyberg	7014	1080	1600	923	7157	1835	2612	2369	1276	206	4932
Sundsvall	12690	3393	2892	2183	26618	3611	3317	7579	2273	480	10216
Sunne	1902	1219	357	307	3098	324	318	1120	221	109	1452
Surahammar	847	232	213	142	2833	451	213	1151	163	72	1157
Svalöv	1467	799	285	215	2421	255	386	2180	252	89	1448
Svedala	3471	567	694	378	3439	267	659	3113	334	148	1625
Svenljunga	1410	755	264	280	2000	215	233	1256	206	98	1215
Säffle	1931	1372	339	428	3361	351	337	1805	185	93	1771
Säter	1376	772	217	239	2489	398	284	1393	237	97	1092
Sävsjö	1248	806	159	1067	1919	189	184	1310	111	61	1070
Söderhamn	2553	1175	442	470	7393	1058	691	2687	498	159	3115
Söderköping	2555	856	425	494	2651	372	571	1624	278	83	1308
Södertälje	10870	1807	2191	3242	15089	2755	3431	5821	1945	479	13482
Sölvesborg	2595	522	322	341	3775	363	441	2860	220	114	1720
Tanum	2310	1108	551	311	1943	329	428	974	331	117	1419
Tibro	1225	530	338	510	2683	260	320	1214	155	49	1025
Tidaholm	1307	539	253	360	3764	396	380	1433	171	96	1226
Tierp	2010	1294	380	390	5669	680	553	1898	434	169	2273
Timrå	1532	569	408	312	5937	789	354	1639	264	85	1924
Tingsryd	1614	1044	177	346	2484	289	220	1624	154	85	1429
Tjörn	3080	585	803	1078	2363	372	582	1512	298	109	1368
Tomelilla	1702	800	251	193	2384	218	350	2127	301	119	1564
Torsby	1318	675	193	215	3305	440	207	1091	155	75	1764
Torsås	760	649	161	193	1582	150	152	982	98	47	709
Tranemo	1539	994	267	312	2514	242	340	1165	181	95	1171
Tranås	2332	793	461	944	4441	488	680	1905	264	110	1796
Trelleborg	6487	1078	1068	684	8907	673	1165	6472	657	265	5017
Trollhättan	6383	1475	1876	1305	14480	2064	2190	4812	1118	333	6319
Trosa	2576	511	409	341	2124	278	525	973	246	71	956
Tyresö	9745	1289	1827	1296	6777	1220	2376	2710	996	230	3643
Täby	19836	2804	4944	3072	5487	976	2687	2824	1161	226	4977
Töreboda	1094	719	157	234	2117	242	220	1031	130	69	1059
Uddevalla	7106	1679	1651	1852	11718	2084	2096	5347	1150	457	5862
Ulricehamn	3547	1931	686	874	4225	693	889	2288	328	134	2302
Umeå	13248	4449	3960	3069	29032	9907	6521	4539	5583	647	10336
Upplands-Väsby	6972	919	1501	1093	7428	1430	1680	2679	825	236	4697
Upplands-Bro	4064	595	995	849	4397	727	958	1825	464	121	2525
Uppsala	30520	8135	10180	7108	35382	10498	14513	11118	9356	960	18509
Uppvidinge	1009	754	155	212	1905	239	168	1142	123	76	964
Vadstena	1332	357	198	305	1752	198	326	657	152	60	719
Vaggeryd	1521	683	261	1013	2921	298	346	1319	163	88	1287
Valdemarsvik	1075	565	149	190	1900	198	177	997	127	55	808
Vallentuna	7287	1364	1403	985	3925	649	1655	2071	712	175	2420
Vansbro	640	629	96	263	1623	253	121	720	96	67	835
Vara	2667	1146	343	422	3074	416	350	1773	191	143	1716
Varberg	10392	3772	2167	1739	12947	1725	2515	4782	1252	453	5414
Vaxholm	3033	580	644	407	1119	235	624	495	247	38	768
Vellinge	11420	1015	1859	1090	2814	233	852	3871	368	135	2238
Vetlanda	3189	1920	609	1615	5581	607	708	2858	316	176	2758
Vilhelmina	400	355	115	244	2032	488	112	562	120	67	831
Vimmerby	1954	1196	233	520	3740	450	399	1600	222	118	1611
Vindeln	546	392	131	214	1422	281	108	345	124	23	632
Vingåker	977	379	154	209	2300	238	272	1209	157	59	781
Vänersborg	4400	1606	1197	1104	8579	1656	1531	3943	709	300	3934
Vännäs	717	594	189	263	2228	688	241	475	199	43	924
Värmdö	9448	1356	1577	1077	5136	946	2096	2626	993	212	3055
Värnamo	4449	2383	644	2134	7373	652	901	2927	361	210	3350
Västervik	4730	1938	922	943	9620	1258	1099	3333	644	247	4232
Västerås	22759	4126	5925	4109	29830	4713	5402	11885	3032	946	15752
Växjö	13525	4307	2416	2807	17623	2927	4051	6885	1778	501	7828
Vårgårda	1329	877	320	763	2059	316	382	1157	163	65	941
Ydre	453	422	88	248	747	83	110	367	48	23	281
Ystad	5559	1215	930	588	5936	576	1040	3324	583	249	3327
Älmhult	2251	1000	314	513	3360	337	523	1498	222	74	1611
Älvdalen	638	452	109	105	1955	211	109	1028	107	69	803
Älvkarleby	774	187	171	132	2840	375	229	1198	130	60	939
Älvsbyn	441	330	144	171	2895	500	117	692	126	30	966
Ängelholm	7932	1659	1251	1255	7112	734	1603	4722	614	298	4525
Åmål	1314	568	307	281	3085	404	392	1341	203	99	1633
Ånge	735	483	94	174	3214	372	126	1044	222	54	1190
Åre	1467	932	208	270	2151	332	601	640	205	87	1110
Årjäng	1056	696	312	446	1641	176	134	1021	83	71	1138
Åsele	221	201	98	65	848	172	36	207	45	25	340
Åstorp	1484	335	263	270	3236	260	324	2017	171	95	2095
Åtvidaberg	1446	623	220	300	3129	304	353	1354	143	101	1107
Öckerö	2636	249	602	1477	1783	346	461	921	250	118	1016
Ödeshög	652	332	94	354	1113	106	174	615	96	33	513
Örebro	19388	4726	4955	5736	29958	5282	7731	10694	3959	940	14067
Örkelljunga	1099	366	185	600	1700	143	229	1615	134	59	1212
Örnsköldsvik	5559	3377	1030	2318	18661	1602	1325	2618	904	399	5765
Östersund	7670	3929	1508	1103	15394	2669	2960	3782	1586	409	6578
Österåker	9652	1489	1956	1308	5262	914	2002	2518	712	218	3482
Östhammar	3017	1285	601	458	5478	611	527	1894	472	182	2528
Östra Göinge	1454	511	273	327	3168	293	328	2305	196	85	1517
Överkalix	194	211	42	27	1250	250	52	310	46	20	410
Övertorneå	291	302	59	98	1289	275	76	301	42	16	667

## Sheet: 2018
	M	C	FP	KD	S	V	MP	SD	Other	Invalid	Nonvoters
Ale	3639	1358	914	1212	5401	1478	759	4301	268	237	2699
Alingsås	5047	2696	1857	2369	7268	2149	1590	4221	374	249	3170
Alvesta	2191	1125	351	916	3532	617	322	3100	177	119	1647
Aneby	726	573	152	652	1073	180	105	947	77	38	506
Arboga	1724	629	357	473	3117	531	293	2004	105	106	1339
Arjeplog	163	142	53	132	647	263	38	373	28	26	354
Arvidsjaur	388	390	150	163	1864	441	39	686	54	65	723
Arvika	2566	1601	605	961	5765	1416	608	3145	294	206	2812
Askersund	1286	718	238	528	2514	426	180	1821	107	77	1021
Avesta	2298	983	425	732	5072	950	323	3597	193	158	2257
Bengtsfors	859	558	158	446	1910	320	140	1556	66	55	1035
Berg	704	779	77	210	1475	290	103	906	66	49	784
Bjurholm	284	233	79	121	464	80	23	296	7	15	284
Bjuv	1241	312	226	363	2627	314	158	3318	90	103	1829
Boden	2736	1190	690	881	7980	1547	424	3393	269	181	2643
Bollebygd	1256	551	348	480	1452	321	254	1482	65	64	642
Bollnäs	2400	1948	585	1016	5942	1313	430	3361	178	178	2955
Borgholm	1452	1090	263	641	1823	435	241	1643	94	68	998
Borlänge	5547	2411	1421	1661	10617	2460	1273	6594	476	377	4809
Borås	14354	5077	3984	4629	20640	4905	2559	12840	916	581	11078
Botkyrka	8407	2354	1992	3691	14680	4471	1749	7287	762	326	12717
Boxholm	557	354	101	214	1396	183	93	729	78	47	460
Bromölla	1091	267	282	373	2528	276	133	3116	85	108	1128
Bräcke	514	586	60	161	1576	307	58	793	76	54	736
Burlöv	1937	504	473	355	3244	624	337	2392	144	95	2408
Båstad	2949	1178	560	885	1703	337	410	2224	116	103	1309
Dals-Ed	477	372	85	305	707	88	65	794	43	38	501
Danderyd	9106	2470	2450	2212	1760	516	825	2263	295	64	1930
Degerfors	683	343	154	257	2827	653	152	1275	71	62	959
Dorotea	106	256	62	84	753	183	21	212	43	36	320
Eda	622	448	121	321	1457	251	54	996	59	76	943
Ekerö	5010	2002	1361	1398	3059	848	1016	2887	233	132	1526
Eksjö	1915	1403	494	1190	3014	534	357	2214	173	143	1495
Emmaboda	852	676	145	362	1985	342	143	1320	94	81	900
Enköping	6523	2843	1304	1869	7422	1343	885	5791	482	253	4020
Eskilstuna	12488	3713	2970	3027	20210	4286	2043	13140	801	657	11447
Eslöv	3644	1510	902	999	5673	1072	682	5780	403	252	3310
Essunga	771	453	100	255	970	217	93	862	43	38	520
Fagersta	1106	328	250	367	3083	622	179	1798	92	108	1478
Falkenberg	5550	3624	1270	2048	8905	1503	1009	5172	391	281	4171
Falköping	3545	2095	779	1922	6173	1251	648	4409	298	191	3076
Falun	7778	4669	1822	2358	11057	3227	1926	6036	588	400	5033
Filipstad	767	312	153	267	2632	458	91	1636	76	97	1274
Finspång	2162	923	492	895	5239	1061	354	2928	231	160	2005
Flen	1706	840	322	566	3338	700	355	2150	141	89	1664
Forshaga	1009	599	212	470	2967	491	193	1556	103	91	975
Färgelanda	570	524	125	246	1144	190	70	1379	52	59	632
Gagnef	991	946	259	589	1893	418	191	1502	112	98	835
Gislaved	3261	2110	566	1393	5223	698	399	3956	146	192	3124
Gnesta	1456	774	250	370	1862	596	388	1356	165	90	956
Gnosjö	1081	572	187	876	1541	166	108	1275	49	54	962
Gotland	6822	7075	1539	1699	12254	3704	2037	5226	773	469	5273
Grums	750	411	128	273	2422	324	100	1365	103	73	968
Grästorp	832	509	140	284	1015	127	81	918	46	41	499
Gullspång	470	291	84	184	1202	200	75	809	74	47	554
Gällivare	1402	422	233	378	4809	1474	283	2341	122	123	2494
Gävle	12033	4189	3551	3257	21258	5609	2573	12893	878	662	9530
Göteborg	69432	24893	25337	19283	83097	48946	24286	47040	7331	3015	65765
Götene	1366	895	353	838	2755	555	318	1675	105	114	1090
Habo	1528	679	327	1172	1839	303	260	1550	88	79	557
Hagfors	705	598	177	343	3610	629	102	1369	74	74	1453
Hallsberg	1410	808	325	600	3763	669	264	2214	147	109	1325
Hallstahammar	1478	532	402	511	3638	802	224	2340	136	110	1682
Halmstad	13953	5398	3475	4083	19929	3613	2420	11598	1029	620	9575
Hammarö	2182	959	720	717	3728	626	449	1437	98	69	1087
Haninge	11583	3058	2579	2704	13776	4036	1875	10042	831	456	8950
Haparanda	563	423	82	234	1615	260	78	1077	70	52	1666
Heby	1249	1196	270	726	2641	502	213	2074	193	134	1409
Hedemora	1498	979	261	680	3004	733	285	2213	171	118	1642
Helsingborg	20811	5299	4488	4706	23562	4206	3228	21048	1114	723	16594
Herrljunga	1066	787	311	562	1578	384	175	1389	110	84	809
Hjo	1162	613	252	600	1709	387	222	1216	75	70	788
Hofors	691	320	215	243	2408	721	117	1336	67	87	1128
Huddinge	14789	4620	3772	3287	16033	5303	3271	9319	1046	429	10970
Hudiksvall	3406	3116	686	1319	8569	2302	888	4024	389	270	4213
Hultsfred	1201	920	159	812	2911	510	137	1891	120	84	1442
Hylte	873	706	200	398	1889	239	116	1562	73	72	1082
Hällefors	510	259	90	145	1704	385	79	1058	59	48	823
Härjedalen	936	933	186	288	2339	476	126	1258	155	75	1244
Härnösand	2131	1618	522	862	5971	1443	702	2743	292	154	2391
Härryda	5791	2251	1969	1570	5211	1409	1342	4272	366	189	2475
Hässleholm	6013	2302	1380	2419	8504	1521	1034	9708	453	393	5261
Håbo	3558	951	717	872	2831	696	375	3237	158	135	1655
Höganäs	4813	1513	1173	1321	3591	599	784	3603	216	145	2217
Högsby	519	339	53	262	1103	183	53	925	29	30	575
Hörby	1740	839	435	660	1957	449	256	3566	162	96	1562
Höör	2029	833	588	690	2074	664	605	3024	230	126	1462
Jokkmokk	269	168	86	125	1301	471	229	543	36	35	650
Järfälla	10937	2881	2756	2872	12635	3995	2074	6847	657	294	7282
Jönköping	16782	8300	4186	11044	24890	5323	3749	14762	1093	717	12034
Kalix	1285	704	315	393	4977	865	306	2015	111	140	1654
Kalmar	8995	4200	2240	2988	13853	3061	1901	7802	601	412	5586
Karlsborg	781	520	258	415	1377	247	108	1093	57	80	515
Karlshamn	3632	1392	727	1095	7073	1306	718	5218	278	241	3014
Karlskoga	3578	1199	792	964	7469	1425	557	3650	265	207	2991
Karlskrona	8134	3177	2304	2758	13845	2458	1503	9553	585	436	5031
Karlstad	12363	5359	3585	4058	20097	4990	3068	8898	916	580	7912
Katrineholm	3745	1730	818	1144	8054	1293	701	3841	257	233	3355
Kil	1296	823	368	469	2575	482	253	1716	78	122	1013
Kinda	1125	812	238	532	1831	396	250	1373	107	70	822
Kiruna	1584	796	371	727	5657	1991	418	2913	339	195	2477
Klippan	1657	612	326	711	2547	423	237	3860	162	150	2004
Knivsta	2628	1207	816	964	2349	611	613	1908	180	77	1076
Kramfors	1124	1503	247	480	4955	1423	226	1902	206	135	1952
Kristianstad	11761	3159	3324	2996	14132	2223	1504	14275	583	542	8620
Kristinehamn	2567	1408	879	953	5483	1215	488	2889	206	170	2463
Krokom	1325	1757	218	528	2920	781	293	1463	106	128	1232
Kumla	2353	984	697	1113	4540	783	377	2940	161	181	1822
Kungsbacka	17156	5464	4255	4382	9149	2074	2050	10824	695	441	5048
Kungsör	894	459	237	301	1688	314	112	1284	81	73	724
Kungälv	6702	2624	1829	2327	7603	1875	1290	5616	388	265	3178
Kävlinge	5234	1561	1300	1056	4616	573	676	5106	274	138	2013
Köping	2562	1105	546	960	5674	1054	368	3923	198	164	2710
Laholm	3105	1930	733	1247	3837	643	492	4223	228	187	2271
Landskrona	4722	1196	1803	1084	8591	1374	854	6800	359	274	5367
Laxå	440	235	103	346	1300	253	60	885	43	37	561
Lekeberg	830	698	160	460	1369	279	144	1264	89	69	541
Leksand	2142	1408	396	1038	2860	771	399	1776	154	113	1300
Lerum	6441	2346	2038	2015	6159	1797	1561	4654	349	265	2646
Lessebo	676	360	126	270	1903	355	123	1098	51	68	702
Lidingö	11178	3658	3346	2666	3831	1087	1533	3400	333	106	3398
Lidköping	4727	2431	1340	1978	9068	1742	979	4724	314	284	3237
Lilla Edet	1239	582	324	445	2478	629	247	2568	119	100	1560
Lindesberg	2408	1298	434	924	4823	929	393	3823	248	179	2189
Linköping	23444	10194	7562	6862	29108	6795	5963	13918	1818	870	12904
Ljungby	3364	1687	551	1533	5115	886	448	4228	259	207	2752
Ljusdal	1739	1480	405	616	4101	833	332	2409	150	168	2389
Ljusnarsberg	340	179	80	126	1015	209	57	936	58	30	592
Lomma	5438	1531	1635	1046	2738	417	626	2807	163	91	1078
Ludvika	2377	1105	591	762	5973	1392	490	3915	263	224	2537
Luleå	8179	4006	2323	2544	20727	5567	1897	7103	836	407	6596
Lund	15223	7726	7765	3778	18447	7746	7264	9739	1887	568	9165
Lycksele	1122	569	297	753	3032	736	112	1074	92	85	1449
Lysekil	1544	698	537	543	3201	652	425	2153	132	115	1424
Malmö	37645	11003	10812	7426	56248	23021	10783	32480	3880	1633	42760
Malung	1282	627	213	401	1958	411	117	1660	87	79	1023
Malå	176	157	76	110	843	278	20	283	18	35	351
Mariestad	3266	1355	606	1200	5415	977	508	2887	195	185	2373
Mark	3640	2426	1243	1608	6624	1653	754	4515	307	267	3143
Markaryd	986	372	109	632	1615	187	94	1883	95	73	1006
Mellerud	947	692	159	411	1462	250	146	1651	65	54	941
Mjölby	3674	1480	803	1161	5743	1029	512	3517	200	207	2351
Mora	2157	1624	464	932	4016	842	397	3099	217	156	2152
Motala	5550	1933	1260	1772	9295	1806	760	5781	293	325	3836
Mullsjö	681	337	127	864	1220	259	193	1065	77	49	568
Munkedal	1122	614	208	480	1750	416	157	1831	96	82	1080
Munkfors	195	190	68	92	1221	143	32	361	38	24	413
Mölndal	9891	3541	3620	2761	10551	3351	2537	6960	721	388	5338
Mönsterås	1233	893	273	578	2840	473	186	2341	94	100	1084
Mörbylånga	1921	1163	406	759	2813	613	418	2134	140	103	949
Nacka	18415	7807	5388	3911	12419	4194	4193	6897	877	364	7164
Nora	1016	614	250	436	2334	439	234	1482	117	72	1057
Norberg	528	214	141	153	1366	357	94	809	80	61	583
Nordanstig	713	717	152	418	1978	586	117	1307	96	70	1209
Nordmaling	603	632	152	273	1672	426	79	760	59	46	776
Norrköping	18220	5784	4286	5736	25235	7237	3597	17459	1491	815	14240
Norrtälje	9153	3952	1951	2439	10805	2555	1550	8191	578	469	6168
Norsjö	202	276	103	236	1079	257	27	332	46	34	500
Nybro	1874	1296	367	952	4158	753	230	2884	183	160	1991
Nykvarn	1865	524	312	415	1535	241	204	1681	70	69	707
Nyköping	7368	3133	1654	2360	11724	2363	1645	5912	528	342	4729
Nynäshamn	3714	1136	792	1026	4813	1192	664	4071	234	173	2791
Nässjö	2990	1634	671	2090	5698	1047	556	4443	268	176	2681
Ockelbo	431	435	75	189	1212	286	108	1042	40	58	623
Olofström	1002	542	192	410	3054	472	160	2407	98	106	1487
Orsa	527	505	120	333	1285	371	137	1223	100	60	715
Orust	2079	1089	555	724	2728	722	403	2282	158	170	1343
Osby	1353	613	204	611	2363	330	189	2615	107	92	1264
Oskarshamn	3243	1080	835	1468	5763	1055	304	3970	152	178	2443
Ovanåker	955	1297	206	770	2472	367	135	1362	81	86	1237
Oxelösund	1199	320	250	357	2993	666	232	1419	109	86	1172
Pajala	359	193	57	281	1434	762	55	627	40	34	878
Partille	5587	1899	1731	1665	5727	1951	1279	3933	308	210	3359
Perstorp	660	208	99	220	1210	137	81	1456	55	54	919
Piteå	3489	2212	744	1418	14018	3117	713	3486	326	196	3375
Ragunda	272	510	57	137	1293	318	53	720	86	48	597
Robertsfors	473	831	107	226	1703	464	121	490	74	37	669
Ronneby	3024	1313	603	969	5573	1027	398	5483	244	176	2640
Rättvik	1287	933	237	544	2043	464	228	1787	121	101	1139
Sala	2400	1761	608	903	4384	939	394	3326	243	177	2025
Salem	2480	760	757	797	2304	597	447	1685	158	81	1397
Sandviken	3559	1661	1066	1110	9164	2080	559	5311	284	271	3762
Sigtuna	6307	1702	1260	1934	6520	1635	882	4931	405	196	5299
Simrishamn	2712	1085	607	799	3099	761	606	3310	264	149	2055
Sjöbo	2263	876	362	766	2371	411	301	4871	197	164	1950
Skara	2370	1032	446	843	3726	731	444	2477	181	118	1741
Skellefteå	5849	4325	1653	2388	22184	4778	1483	5710	594	519	6830
Skinnskatteberg	307	191	140	113	1102	188	58	723	43	30	497
Skurup	2072	728	384	440	2268	429	264	3352	117	100	1357
Skövde	7660	3226	2068	2947	10561	2064	1245	6210	673	390	5066
Smedjebacken	1037	468	183	335	2900	563	158	1702	94	105	1019
Sollefteå	1132	1622	202	550	4453	1933	190	2357	192	147	2002
Sollentuna	12260	4445	3918	3290	9107	2833	2293	4910	620	258	5663
Solna	11976	4563	4101	2928	12124	4995	3205	5707	911	278	7305
Sorsele	166	185	29	105	540	193	30	234	32	39	369
Sotenäs	1631	521	352	535	1639	313	175	1353	73	53	888
Staffanstorp	4375	1192	1009	809	3469	492	591	3604	192	100	1615
Stenungsund	4175	1279	1092	1195	4543	943	711	3375	196	177	1987
Stockholm	133731	55428	47988	29776	145245	80217	47044	60135	11642	3654	89297
Storfors	281	219	75	140	1067	180	32	590	38	34	395
Storuman	459	416	132	299	1307	413	78	645	51	58	779
Strängnäs	6102	1837	1123	1344	5384	1369	880	4526	279	240	3021
Strömstad	1384	616	485	518	1923	411	323	1533	135	59	1412
Strömsund	764	946	80	307	3071	576	107	1552	72	111	1403
Sundbyberg	6667	2400	2104	1499	7929	3292	1779	3649	488	202	5038
Sundsvall	10914	5448	3146	3305	24834	4915	2118	10305	937	557	8879
Sunne	1551	1332	347	633	2524	425	225	1654	119	136	1289
Surahammar	809	250	210	260	2272	511	119	1719	91	64	1102
Svalöv	1284	796	315	434	1966	396	221	2930	191	95	1215
Svedala	3105	821	735	724	3004	440	405	4322	179	147	1390
Svenljunga	1199	821	295	466	1774	283	148	1760	138	90	1040
Säffle	1541	1409	303	671	2739	453	198	2485	97	125	1601
Säter	1290	945	239	469	2267	477	193	1648	82	133	970
Sävsjö	1154	695	166	1261	1550	223	117	1796	66	71	1018
Söderhamn	2407	1662	500	844	6128	1386	402	3285	162	182	2744
Söderköping	2158	1086	495	780	2232	550	348	2179	127	96	1132
Södertälje	9561	2827	2149	5392	13122	3719	2178	8441	884	411	14099
Sölvesborg	2246	670	371	722	3279	436	246	3681	136	143	1588
Tanum	1963	1064	471	572	1947	433	300	1671	153	85	1236
Tibro	1168	596	398	694	2240	333	162	1516	69	71	977
Tidaholm	1162	634	295	598	3245	488	222	1848	97	98	1116
Tierp	1903	1565	430	747	4676	912	376	2890	303	149	1994
Timrå	1433	818	368	597	5189	959	224	2335	109	105	1739
Tingsryd	1233	918	141	659	2153	380	158	2136	103	95	1229
Tjörn	2434	862	778	1382	2315	573	428	2342	145	91	1202
Tomelilla	1527	815	254	402	1996	368	253	2860	142	141	1397
Torsby	1047	842	231	387	2664	490	139	1610	99	107	1483
Torsås	601	566	135	348	1354	209	98	1358	52	36	652
Tranemo	1377	1077	293	479	2296	348	210	1519	83	96	1043
Tranås	2050	1127	489	1123	3889	657	380	2393	171	111	1609
Trelleborg	6116	1623	1280	1475	7075	1105	717	8738	322	327	4548
Trollhättan	6493	2238	1822	1857	13256	2538	1594	6364	447	369	5801
Trosa	2407	814	415	558	2073	470	366	1666	95	62	936
Tyresö	7818	2399	2099	1741	7223	1929	1636	4941	474	222	3294
Täby	16687	5094	4966	3853	6491	1483	1908	5293	611	230	4541
Töreboda	1027	646	184	391	1812	275	119	1372	112	83	903
Uddevalla	6596	2373	1769	2547	10905	2430	1410	7411	528	342	5484
Ulricehamn	3167	2081	821	1278	3982	891	520	3154	202	161	2147
Umeå	12992	8041	3971	3786	29204	13244	4620	7253	1463	551	9908
Upplands-Väsby	5970	1618	1463	1734	6966	2069	1012	4659	339	206	4704
Upplands-Bro	3790	984	889	1234	4281	1089	532	3291	276	140	2517
Uppsala	26649	12913	10724	9976	38310	15879	10431	16662	3123	974	17126
Uppvidinge	838	681	127	421	1653	337	97	1505	76	96	885
Vadstena	1200	493	199	391	1549	315	209	898	73	48	651
Vaggeryd	1345	912	316	1150	2585	367	233	1796	109	83	1212
Valdemarsvik	931	570	145	387	1618	290	109	1252	77	64	714
Vallentuna	5927	2119	1620	1588	3962	937	1017	3485	297	147	2339
Vansbro	599	657	96	436	1322	324	56	937	74	64	730
Vara	2262	1237	359	688	2620	512	201	2485	141	136	1534
Varberg	8993	4838	2511	3257	12312	2426	1603	7013	516	405	4856
Vaxholm	2457	1078	629	640	1327	381	446	1058	90	47	638
Vellinge	9988	1829	1832	1881	2672	331	559	5946	207	115	1871
Vetlanda	2999	1938	617	2050	4925	692	378	3922	190	167	2389
Vilhelmina	327	623	79	319	1632	472	49	712	163	52	816
Vimmerby	1687	1397	208	858	3144	580	240	2098	146	116	1399
Vindeln	509	500	92	252	1113	279	69	550	67	29	613
Vingåker	930	416	156	363	1974	419	163	1440	52	64	778
Vänersborg	4038	1854	1129	1697	7994	1733	899	5578	339	276	3553
Vännäs	714	733	158	338	1944	737	173	740	78	35	873
Värmdö	7728	2743	1799	1657	5759	1693	1522	4832	382	220	3036
Värnamo	4030	2804	798	2572	6335	834	566	4097	232	212	3154
Västervik	4155	2154	954	1555	8431	1637	694	4709	282	258	3938
Västerås	21314	6070	6557	5928	27963	6863	3267	16814	1256	831	14632
Växjö	12726	5448	2638	4277	17870	4282	2478	9160	671	453	7174
Vårgårda	1138	940	329	943	1888	428	271	1562	99	70	905
Ydre	414	390	95	324	598	143	78	536	38	13	252
Ystad	4868	1603	993	1197	5281	858	695	5026	265	250	2876
Älmhult	1879	1121	340	710	2976	487	300	2148	106	99	1422
Älvdalen	510	553	121	252	1509	251	76	1340	84	93	738
Älvkarleby	700	265	206	257	2360	410	133	1607	71	78	868
Älvsbyn	454	479	160	246	2378	570	65	882	72	40	911
Ängelholm	7113	2274	1315	2067	6276	1046	895	6819	329	284	4084
Åmål	1091	596	269	466	2762	533	242	1835	115	85	1431
Ånge	707	537	100	306	2630	429	68	1390	113	72	1065
Åre	1127	1577	197	348	1911	602	451	960	124	87	946
Årjäng	777	561	196	902	1418	206	101	1411	54	72	1070
Åsele	157	301	48	86	727	156	20	280	30	20	313
Åstorp	1504	409	257	407	2546	340	149	3004	103	88	1885
Åtvidaberg	1327	778	324	475	2678	400	230	1705	96	88	973
Öckerö	2012	494	605	1783	1710	452	422	1606	86	71	831
Ödeshög	592	365	82	536	928	147	92	742	72	26	449
Örebro	17616	7919	5565	7621	30988	8325	4692	14151	1551	872	13830
Örkelljunga	954	416	165	751	1288	180	145	2200	93	61	1080
Örnsköldsvik	4814	4562	1016	2716	16850	2233	838	4328	429	378	4923
Östersund	6576	5998	1564	2139	14047	3829	1858	5605	560	421	5874
Österåker	8224	2592	2072	1976	5463	1376	1231	4459	318	236	3362
Östhammar	2580	1306	604	1250	4579	749	378	3128	240	155	2306
Östra Göinge	1587	517	211	509	2418	333	180	2913	79	131	1374
Överkalix	175	197	47	77	1046	235	24	411	29	29	397
Övertorneå	253	429	45	142	1040	247	35	426	16	19	621
